# Supplementary material for: Subnational mortality estimates for India in 2019: a baseline for evaluating excess deaths due to the COVID-19 pandemic
Source: PubMed Central journal article supplement — BMJ Glob Health. 2021 Nov 25;6(11):e007399. doi: 10.1136/bmjgh-2021-007399 (PMC8627370; doi:10.1136/bmjgh-2021-007399), 2021-11-25
Supplement: bmjgh-2021-007399supp001.pdf [file bmjgh-2021-007399supp001.pdf]

## Supplementary Appendix File

MS Title: Subnational mortality estimates for India in 2019: A baseline for evaluating excess deaths due to the COVID pandemic

### List of Appendices

Appendix Table 1: GATHER Statement

Appendix Table 2: Input data for estimating completeness of death registration using the Adair Lopez method, and completeness estimates by sex with 95% Uncertainty intervals for India and States, 2019

Appendix Table 3: Model life table methods and inputs for selected States / UTs

Appendix Table 4: 95% Uncertainty intervals for estimates of life expectancy at birth and deaths for broad age groups by sex for India & States, 2019

Appendix Table 5: Adjustment factors (with sources) for correction of under-reporting of deaths in CRS data by sex and age for India and States, 2019

Appendix Table 6: CRS reported & final estimates of deaths by sex and age for India and States/UTs, 2019

Appendix Table 7: Annual proportions of delayed registration for states/UT during 2016 to 2019

Appendix table 8: Estimated life tables by sex for India and States / Union Territories in 2019

Appendix Figure 1: Logarithmic age-specific death rates at ages 55 to 70+ years for males and females in selected states of India with high overall completeness of death registration in 2019

Appendix Figure 2a: Scatter plot comparing Study and GBD life expectancies at birth for males, 2019

Appendix Figure 2b: Scatter plot comparing Study and GBD life expectancies at birth for females, 2019

**Appendix Table 1. GATHER checklist of information that should be included in reports of global health estimates, with description of compliance and location of information for article titled: Subnational mortality estimates for India in 2019: A baseline for evaluating excess deaths due to the COVID pandemic**

| #                                                                                           | GATHER checklist item                                                               | Description of compliance                                                                                                                                                                                                                                                                                                                                                                                        | Reference                                                                                                                                                        |
|---------------------------------------------------------------------------------------------|-------------------------------------------------------------------------------------|------------------------------------------------------------------------------------------------------------------------------------------------------------------------------------------------------------------------------------------------------------------------------------------------------------------------------------------------------------------------------------------------------------------|------------------------------------------------------------------------------------------------------------------------------------------------------------------|
| <b>Objectives and funding</b>                                                               |                                                                                     |                                                                                                                                                                                                                                                                                                                                                                                                                  |                                                                                                                                                                  |
| 1                                                                                           | Define the indicators, populations, and time periods for which estimates were made. | Outcome Indicators are estimates of death by age and sex and life expectancy at birth.<br><br>Estimates were developed for India at national level and for 29 states and 7 UTs (Jammu and Kashmir as a state)<br><br>Estimates were for 2019                                                                                                                                                                     | Information on study population and reference period for estimates provided in Main text Methods section on page 2-3<br><br>Outcome measures described on page 6 |
| 2                                                                                           | List the funding sources for the work.                                              | There were no funding sources                                                                                                                                                                                                                                                                                                                                                                                    | Not applicable                                                                                                                                                   |
| <b>Data Inputs</b>                                                                          |                                                                                     |                                                                                                                                                                                                                                                                                                                                                                                                                  |                                                                                                                                                                  |
| <i>For all data inputs from multiple sources that are synthesized as part of the study:</i> |                                                                                     |                                                                                                                                                                                                                                                                                                                                                                                                                  |                                                                                                                                                                  |
| 3                                                                                           | Describe how the data were identified and how the data were accessed.               | All data used in this analysis are available in the public domain via the internet<br><br>Data from Civil Registration System (CRS)<br><br>Sample Registration System (SRS)<br><br>Under 5 Mortality rates from Fifth National Family and Health Survey (NFHS-5) factsheets.<br><br>Populations from projections developed by the National Commission on Population.<br><br>State GBD Life Expectancies for 2019 | CRS: References 9,10<br><br>References 11, 17<br><br>Reference 13<br><br>Reference 12<br><br>Reference 14, 31                                                    |
| 4                                                                                           | Specify the inclusion and exclusion criteria. Identify all ad-hoc exclusions.       | All representative mortality data sources for India and states were included in this analysis, namely CRS 2019, SRS 2018, and NFHS.<br><br>Synthesized mortality estimates from GBD were also included for the comparative analyses.                                                                                                                                                                             | Methods section on Page 2-3                                                                                                                                      |

| <b>Data analysis</b> |                                                                                                                                                                                                                                                                         |                                                                                                                                                                                                                                                                                                                                             |                                                                                                                                                                                                                                                                   |
|----------------------|-------------------------------------------------------------------------------------------------------------------------------------------------------------------------------------------------------------------------------------------------------------------------|---------------------------------------------------------------------------------------------------------------------------------------------------------------------------------------------------------------------------------------------------------------------------------------------------------------------------------------------|-------------------------------------------------------------------------------------------------------------------------------------------------------------------------------------------------------------------------------------------------------------------|
| 9                    | Provide a conceptual overview of the data analysis method.                                                                                                                                                                                                              | A conceptual overview of the methods is provided in various subsections. Subsections are (i) Death Registration Completeness; (ii) Under five mortality adjustment; (iii) Adult mortality adjustment and (iv) Mortality adjustment at older ages                                                                                            | Conceptual overview of data analysis described in Methods section                                                                                                                                                                                                 |
| 10                   | Provide a detailed description of all steps of the analysis, including mathematical formulae. This description should cover, as relevant, data cleaning, data pre-processing, data adjustments and weighting of data sources, and mathematical or statistical model(s). | The methods are described in various subsections. Subsections are (i) Death Registration Completeness; (ii) Under five mortality adjustment; (iii) Adult mortality adjustment and (iv) Mortality adjustment at older ages<br><br>CRS deaths were interpolated into 5 year age categories derived from SRS 2018 as described in Reference 5. | Interpolation step for deriving age categories CRS deaths at older ages described in reference 5<br><br>Adair-Lopez Completeness estimated according to the methodology described in reference 15<br><br>Spreadsheet tool provided for life table in reference 18 |
| 11                   | Describe how candidate models were evaluated and how the final model(s) were selected.                                                                                                                                                                                  | We used the 2 parameter WHO Modmatch life table system to estimate abridged schedules of age-specific mortality by sex, for 9 states/UTs                                                                                                                                                                                                    | Details provided in Methods section. Weblinks to Modmatch materials are provided in the references. Input parameters are provided in appendix table 3<br><br>Model life table references 19 and 20                                                                |
| 12                   | Provide the results of an evaluation of model performance, if done, as well as the results of any relevant sensitivity analysis.                                                                                                                                        | Not Applicable                                                                                                                                                                                                                                                                                                                              | Not Applicable                                                                                                                                                                                                                                                    |
| 13                   | Describe methods for calculating uncertainty of the estimates. State which sources of uncertainty were, and were not, accounted for in the uncertainty analysis.                                                                                                        | Confidence intervals for summary outputs from boot strapping.<br><br>Uncertainty was not accounted for in population estimates that were obtained from the National Commission on Population projections.<br><br>Details of the uncertainty evaluation described in methods and results.                                                    | Reference for bootstrapping spreadsheet at reference 23                                                                                                                                                                                                           |

|                               |                                                                                                                                                          |                                                                                                                                                                                                                          |                                           |
|-------------------------------|----------------------------------------------------------------------------------------------------------------------------------------------------------|--------------------------------------------------------------------------------------------------------------------------------------------------------------------------------------------------------------------------|-------------------------------------------|
| 14                            | State how analytic or statistical source code used to generate estimates can be accessed.                                                                | Not Applicable                                                                                                                                                                                                           | Not Applicable                            |
| <b>Results and Discussion</b> |                                                                                                                                                          |                                                                                                                                                                                                                          |                                           |
| 15                            | Provide published estimates in a file format from which data can be efficiently extracted.                                                               | Results are available in the main tables and appendix tables.                                                                                                                                                            | Tables 1-4 and appendix tables 4-7        |
| 16                            | Report a quantitative measure of the uncertainty of the estimates (e.g. uncertainty intervals).                                                          | 95% Uncertainty intervals of deaths by sex for 4 broad age groups, and for life expectancy estimates are provided in Appendix table 4.                                                                                   | Appendix Table 4                          |
| 17                            | Interpret results in light of existing evidence. If updating a previous set of estimates, describe the reasons for changes in estimates.                 | Comparative analysis is done between:<br>(i) Estimated deaths and reported CRS deaths<br>(ii) Estimated life Expectancy with CRS reported life expectancy<br>(iii) Estimated life expectancies and GBD Life Expectancies | Table 1, 3 and 4 and discussions section. |
| 18                            | Discuss limitations of the estimates. Include a discussion of any modelling assumptions or data limitations that affect interpretation of the estimates. | Study limitations described in Discussion section                                                                                                                                                                        | Discussion section                        |

**Appendix Table 2: Input data for estimating completeness of death registration using the Adair Lopez method, and completeness estimates by sex with 95% Uncertainty intervals for India and States, 2019**

| Location          | MALES                      |                       |                  |                          |                |      |      |                    |            |
|-------------------|----------------------------|-----------------------|------------------|--------------------------|----------------|------|------|--------------------|------------|
|                   | Registered Deaths All ages | Mid-year pop All ages | % population 65+ | True U5MR <sup>1,2</sup> | Completeness % | LL   | UL   | Final total deaths | Final comp |
| Andhra Pradesh    | 244619                     | 26330627              | 7.50%            | 0.034                    | 93%            | 91.6 | 94.8 | 260955             | 94%        |
| Arunachal Pradesh | 2643                       | 778000                | 4.30%            | 0.044                    | 37%            | 31.4 | 44.7 | 6456               | 41%        |
| Assam             | 102545                     | 17832058              | 5.02%            | 0.044                    | 77%            | 71.6 | 81.7 | 131766             | 78%        |
| Bihar             | 223334                     | 64005072              | 5.19%            | 0.034                    | 57%            | 51.5 | 63.5 | 466770             | 48%        |
| Chhattisgarh      | 110735                     | 15034382              | 4.56%            | 0.046                    | 88%            | 84.5 | 90.5 | 137616             | 80%        |
| Goa               | 8209                       | 768002                | 5.50%            | 0.021                    | 98%            | 97.8 | 98.9 | 8209               | 100%       |
| Gujarat           | 276232                     | 36514600              | 5.70%            | 0.032                    | 92%            | 89.5 | 93.3 | 298876             | 92%        |
| Haryana           | 119360                     | 15556738              | 5.69%            | 0.036                    | 91%            | 88.2 | 92.6 | 131928             | 90%        |
| Himachal Pradesh  | 25463                      | 3741750               | 7.96%            | 0.022                    | 90%            | 87.7 | 92.1 | 28032              | 91%        |
| Jammu & Kashmir   | 24421                      | 7037330               | 6.07%            | 0.023                    | 67%            | 61.9 | 71.9 | 43396              | 56%        |
| Jharkhand         | 71008                      | 19660804              | 5.22%            | 0.030                    | 64%            | 57.6 | 69.4 | 130724             | 54%        |
| Karnataka         | 307936                     | 33740466              | 6.68%            | 0.026                    | 96%            | 94.7 | 96.7 | 321738             | 96%        |
| Kerala            | 148399                     | 16974473              | 9.98%            | 0.011                    | 98%            | 97.0 | 98.0 | 152063             | 98%        |
| Madhya Pradesh    | 309719                     | 43550654              | 5.00%            | 0.058                    | 81%            | 75.9 | 85.1 | 386756             | 80%        |
| Maharashtra       | 401093                     | 64405616              | 6.87%            | 0.021                    | 90%            | 88.3 | 91.8 | 445557             | 90%        |
| Manipur           | 2005                       | 1567000               | 4.30%            | 0.030                    | 29%            | 22.9 | 37.2 | 12438              | 16%        |
| Meghalaya         | 11097                      | 1625000               | 4.30%            | 0.040                    | 88%            | 84.6 | 91.0 | 13095              | 85%        |
| Mizoram           | 4052                       | 605000                | 4.30%            | 0.024                    | 93%            | 90.5 | 95.9 | 4585               | 88%        |
| Nagaland          | 1632                       | 1116000               | 4.30%            | 0.033                    | 32%            | 25.1 | 39.6 | 6385               | 26%        |

**Appendix Table 2: Input data for estimating completeness of death registration using the Adair Lopez method, and completeness estimates by sex with 95% Uncertainty intervals for India and States, 2019**

| Location         | MALES                      |                       |                  |                          |                |      |      |                    |            |
|------------------|----------------------------|-----------------------|------------------|--------------------------|----------------|------|------|--------------------|------------|
|                  | Registered Deaths All ages | Mid-year pop All ages | % population 65+ | True U5MR <sup>1,2</sup> | Completeness % | LL   | UL   | Final total deaths | Final comp |
| Odisha           | 195891                     | 21383760              | 8.16%            | 0.044                    | 89%            | 85.8 | 91.9 | 219233             | 89%        |
| Punjab           | 124525                     | 15864373              | 7.81%            | 0.023                    | 93%            | 91.7 | 94.5 | 134045             | 93%        |
| Rajasthan        | 284983                     | 40732632              | 4.89%            | 0.040                    | 88%            | 84.5 | 90.3 | 326922             | 87%        |
| Sikkim           | 2021                       | 340080                | 7.30%            | 0.011                    | 92%            | 87.6 | 94.8 | 2650               | 76%        |
| Tamil Nadu       | 377430                     | 38004485              | 8.33%            | 0.018                    | 97%            | 96.9 | 97.9 | 386603             | 98%        |
| Telangana        | 132311                     | 18884868              | 6.43%            | 0.029                    | 90%            | 87.3 | 91.9 | 147274             | 90%        |
| Tripura          | 18448                      | 2042000               | 4.30%            | 0.043                    | 93%            | 91.2 | 95.2 | 19622              | 94%        |
| Uttar Pradesh    | 535017                     | 119986720             | 4.89%            | 0.046                    | 62%            | 55.3 | 67.8 | 898121             | 60%        |
| Uttarkhand       | 40517                      | 5816720               | 6.32%            | 0.034                    | 87%            | 84.4 | 89.9 | 46563              | 87%        |
| West Bengal      | 326754                     | 49920665              | 6.89%            | 0.026                    | 88%            | 86.1 | 90.5 | 368312             | 89%        |
| A & N islands    | 1616                       | 211553                | 6.80%            | 0.025                    | 93%            | 89.3 | 95.6 | 1961               | 82%        |
| Dadra & N Haveli | 1638                       | 335000                | 4.60%            | 0.037                    | 75%            | 69.0 | 82.0 | 2664               | 61%        |
| Daman & Diu      | 727                        | 298000                | 4.60%            | 0.037                    | 41%            | 33.9 | 50.9 | 2190               | 33%        |
| Delhi            | 89723                      | 10908852              | 5.32%            | 0.019                    | 97%            | 96.2 | 97.7 |                    | NA         |
| INDIA            | 4549292                    | 696982378             | 6.07%            | 0.039                    | 83%            | 78.7 | 86.1 | 5605758            | 81%        |

1. True under-five mortality rates (U5MR) were sourced from SRS 2018 or NFHS 5, except Jharkhand (NFHS 4).

2. These true U5MR values were also used to correct CRS deaths for this age group, as shown in Figure 1

3. Completeness by Adair Lopez method was not estimated for Chandigarh, Lakshadweep and Puducherry, as there was no available alternate estimate of under-five mortality rate

|                                                                                                       |                                                                                                                                                                                                                                                                                                                                                                                         |                                                                                                                                                                                                                                                                                                                 |                                                                                                                                                                              |
|-------------------------------------------------------------------------------------------------------|-----------------------------------------------------------------------------------------------------------------------------------------------------------------------------------------------------------------------------------------------------------------------------------------------------------------------------------------------------------------------------------------|-----------------------------------------------------------------------------------------------------------------------------------------------------------------------------------------------------------------------------------------------------------------------------------------------------------------|------------------------------------------------------------------------------------------------------------------------------------------------------------------------------|
| 5                                                                                                     | Provide information on all included data sources and their main characteristics. For each data source used, report reference information or contact name/institution, population represented, data collection method, year(s) of data collection, sex and age range, diagnostic criteria or measurement method, and sample size, as relevant.                                           | Data sources and their characteristics are described in specific references for each source.                                                                                                                                                                                                                    | Characteristics of each data source relevant to this analysis are summarized in Introduction and Methods sections, with appropriate references provided in the bibliography. |
| 6                                                                                                     | Identify and describe any categories of input data that have potentially important biases (e.g., based on characteristics listed in item 5).                                                                                                                                                                                                                                            | Summary of known biases in mortality data from empirical national data sources (CRS, SRS, NFHS) included in methods and discussions.                                                                                                                                                                            | Main text, Methods section, on Pages 2 and 3<br><br>Discussions on Pages 21 and 22                                                                                           |
| <i>For data inputs that contribute to the analysis but were not synthesized as part of the study:</i> |                                                                                                                                                                                                                                                                                                                                                                                         |                                                                                                                                                                                                                                                                                                                 |                                                                                                                                                                              |
| 7                                                                                                     | Describe and give sources for any other data inputs.                                                                                                                                                                                                                                                                                                                                    | None                                                                                                                                                                                                                                                                                                            | Not applicable                                                                                                                                                               |
| <i>For all data inputs:</i>                                                                           |                                                                                                                                                                                                                                                                                                                                                                                         |                                                                                                                                                                                                                                                                                                                 |                                                                                                                                                                              |
| 8                                                                                                     | Provide all data inputs in a file format from which data can be efficiently extracted (e.g., a spreadsheet as opposed to a PDF), including all relevant meta-data listed in item 5. For any data inputs that cannot be shared due to ethical or legal reasons, such as third-party ownership, provide a contact name or the name of the institution that retains the right to the data. | Inputs for estimating the Adair-Lopez Method of completeness and for estimating model life tables for selected states using the WHO Modified Logit Life table system are available from Appendix tables 2 and 3<br><br>All other population and mortality data inputs are available from the weblinks provided. | Weblinks to data inputs available from references                                                                                                                            |

**Appendix Table 2: Input data for estimating completeness of death registration using the Adair Lopez method, and completeness estimates by sex with 95% Uncertainty intervals for India and States, 2019**

| Location          | FEMALES                    |                       |                  |                          |                |      |      |                    |            |
|-------------------|----------------------------|-----------------------|------------------|--------------------------|----------------|------|------|--------------------|------------|
|                   | Registered Deaths All ages | Mid-year pop All ages | % population 65+ | True U5MR <sup>1,2</sup> | Completeness % | LL   | UL   | Final total deaths | Final comp |
| Andhra Pradesh    | 156853                     | 26197072              | 8.76%            | 0.032                    | 85%            | 81.6 | 88.4 | 183523             | 85%        |
| Arunachal Pradesh | 847                        | 810695                | 3.80%            | 0.051                    | 21%            | 15.3 | 27.6 | 4101               | 21%        |
| Assam             | 60512                      | 17145000              | 5.11%            | 0.051                    | 57%            | 49.3 | 64.1 | 122827             | 49%        |
| Bihar             | 136015                     | 59105426              | 5.31%            | 0.039                    | 43%            | 36.8 | 51.3 | 389369             | 35%        |
| Chhattisgarh      | 77319                      | 14911490              | 5.98%            | 0.045                    | 80%            | 74.9 | 84.5 | 106216             | 73%        |
| Goa               | 5642                       | 747266                | 6.20%            | 0.023                    | 98%            | 96.5 | 98.3 | 5642               | 100%       |
| Gujarat           | 186040                     | 33034692              | 7.18%            | 0.029                    | 88%            | 85.5 | 90.9 | 208165             | 89%        |
| Haryana           | 69550                      | 13788880              | 7.13%            | 0.036                    | 80%            | 74.9 | 83.9 | 87560              | 79%        |
| Himachal Pradesh  | 18170                      | 3627948               | 9.43%            | 0.025                    | 80%            | 75.6 | 84.0 | 23077              | 79%        |
| Jammu & Kashmir   | 19806                      | 6360780               | 6.52%            | 0.023                    | 71%            | 65.5 | 75.8 | 31231              | 63%        |
| Jharkhand         | 48366                      | 18742850              | 5.70%            | 0.039                    | 47%            | 39.4 | 53.8 | 123557             | 39%        |
| Karnataka         | 200648                     | 32679538              | 7.69%            | 0.030                    | 90%            | 87.1 | 92.1 | 228218             | 88%        |
| Kerala            | 122154                     | 18328599              | 11.73%           | 0.009                    | 97%            | 96.1 | 97.3 | 126140             | 97%        |
| Madhya Pradesh    | 183609                     | 40781349              | 5.81%            | 0.053                    | 67%            | 60.6 | 74.1 | 272111             | 67%        |
| Maharashtra       | 292637                     | 59297615              | 8.26%            | 0.023                    | 85%            | 82.0 | 87.9 | 357150             | 82%        |
| Manipur           | 985                        | 1522000               | 3.80%            | 0.030                    | 28%            | 21.7 | 36.7 | 7141               | 14%        |
| Meghalaya         | 7201                       | 1615000               | 3.80%            | 0.040                    | 83%            | 78.6 | 86.0 | 8216               | 88%        |
| Mizoram           | 2554                       | 593000                | 3.80%            | 0.024                    | 91%            | 87.5 | 93.7 | 2578               | 99%        |
| Nagaland          | 639                        | 1044000               | 3.80%            | 0.033                    | 26%            | 20.1 | 35.2 | 4139               | 15%        |



**Appendix Table 2: Input data for estimating completeness of death registration using the Adair Lopez method, and completeness by sex with 95% Uncertainty intervals for India and States, 2019**

| Location         | FEMALES                    |                       |                  |                          |                |      |      |                    |            |
|------------------|----------------------------|-----------------------|------------------|--------------------------|----------------|------|------|--------------------|------------|
|                  | Registered Deaths All ages | Mid-year pop All ages | % population 65+ | True U5MR <sup>1,2</sup> | Completeness % | LL   | UL   | Final total deaths | Final comp |
| Odisha           | 147056                     | 22717702              | 8.21%            | 0.043                    | 85%            | 80.2 | 87.9 | 176879             | 83%        |
| Punjab           | 88617                      | 14325135              | 9.04%            | 0.022                    | 92%            | 89.5 | 93.2 | 96278              | 92%        |
| Rajasthan        | 166273                     | 38368072              | 6.26%            | 0.041                    | 71%            | 64.5 | 76.7 | 235519             | 71%        |
| Sikkim           | 1287                       | 302671                | 7.60%            | 0.011                    | 90%            | 86.7 | 93.0 | 1707               | 75%        |
| Tamil Nadu       | 256467                     | 38015370              | 9.14%            | 0.017                    | 95%            | 94.4 | 96.4 | 268955             | 95%        |
| Telangana        | 95983                      | 18613229              | 7.75%            | 0.030                    | 83%            | 79.1 | 86.2 | 115444             | 83%        |
| Tripura          | 11968                      | 1970000               | 3.80%            | 0.043                    | 91%            | 88.6 | 93.5 | 13162              | 91%        |
| Uttar Pradesh    | 409579                     | 110128815             | 5.61%            | 0.048                    | 60%            | 52.7 | 66.9 | 760186             | 54%        |
| Uttarkhand       | 25796                      | 5526600               | 7.68%            | 0.032                    | 76%            | 71.6 | 81.2 | 33804              | 76%        |
| West Bengal      | 224941                     | 47799232              | 7.05%            | 0.026                    | 84%            | 80.6 | 87.2 | 278966             | 81%        |
| A & N islands    | 1000                       | 185320                | 7.20%            | 0.025                    | 90%            | 82.3 | 93.9 | 1216               | 82%        |
| Dadra & N Haveli | 1067                       | 229000                | 5.90%            | 0.037                    | 79%            | 72.5 | 87.0 | 1498               | 71%        |
| Daman & Diu      | 435                        | 132000                | 5.90%            | 0.037                    | 61%            | 53.0 | 70.7 | 746                | 58%        |
| Delhi            | 55527                      | 9585263               | 6.18%            | 0.018                    | 96%            | 94.5 | 96.6 |                    |            |
| INDIA            | 3089528                    | 659544784             | 6.95%            | 0.039                    | 74%            | 68.2 | 79.4 | 4319485            | 72%        |

1. True under-five mortality rates (U5MR) were sourced from SRS 2018 or NFHS 5, except Jharkhand (NFHS 4).

2. These true U5MR values were also used to correct CRS deaths for this age group, as shown in Figure 1

3. Completeness by Adair Lopez method was not estimated for Chandigarh, Lakshadweep and Puducherry, as there was no available alternate estimate of under-five mortality rate

**APPENDIX TABLE 3****Model life tables**

For states without data from the Sample Registration System (SRS), age-specific death rates were estimated from the World Health Organization Modified Logit Life Table System, implemented through its customized software tool named 'MODMATCH', to serve as comparators to evaluate the quality of age-specific death rates based on data from the Civil Registration System for these states. The MODMATCH system uses input values of risk of under-five mortality ( ${}_5q_0$ ) and risk of adult mortality ( ${}_{45}q_{15}$ ) in a statistical model, to predict a complete schedule of age-specific mortality risks for the location of interest. Mortality patterns in the MODMATCH model life tables approach are predicted from relationships between observed levels of child and adult mortality and their associated age-specific mortality patterns across all ages. For MODMATCH, the regression equations for the WHO international relational standard used in the model were derived using an international historical series of reliable life tables collected since 1950 onwards.

The input values of  ${}_5q_0$  and  ${}_{45}q_{15}$  for each of the States / Union Territories are shown in the following table, along with the sources for each value. As can be seen, the  ${}_5q_0$  values were obtained from the 5<sup>th</sup> round of National Family and Health Surveys conducted during 2019-2020, except for Arunachal Pradesh, where the NFHS report has not yet been released, hence the  ${}_5q_0$  risk from the SRS for Assam (neighboring state) was used. For adult mortality, the CRS raw data derived values of  ${}_{45}q_{15}$  were adjusted for completeness based on the Adair Lopez estimated completeness, and then used as input values in the MODMATCH System.

| Location          | Males     |       |                 |       | Females   |       |                 |       |
|-------------------|-----------|-------|-----------------|-------|-----------|-------|-----------------|-------|
|                   | ${}_5q_0$ |       | ${}_{45}q_{15}$ |       | ${}_5q_0$ |       | ${}_{45}q_{15}$ |       |
|                   | Source    | Value | Source          | Value | Source    | Value | Source          | Value |
| Arunachal Pradesh | Assam SRS | 44    | CRS AL adj      | 252   | Assam SRS | 51    | CRS AL adj      | 157   |
| Manipur           | NFHS 5    | 30    | CRS AL adj      | 236   | NFHS 5    | 30    | CRS AL adj      | 126   |
| Meghalaya         | NFHS 5    | 40    | CRS AL adj      | 252   | NFHS 5    | 40    | CRS AL adj      | 147   |
| Mizoram           | NFHS 5    | 24    | CRS AL adj      | 267   | NFHS 5    | 24    | CRS AL adj      | 128   |
| Nagaland          | NFHS 5    | 33    | CRS AL adj      | 165   | NFHS 5    | 33    | CRS AL adj      | 107   |
| Sikkim            | NFHS 5    | 17    | CRS AL adj      | 151   | NFHS 5    | 17    | CRS AL adj      | 78    |
| A & N Islands     | NFHS 5    | 25    | CRS AL adj      | 233   | NFHS 5    | 25    | CRS AL adj      | 142   |
| Dadra & NH        | NFHS 5    | 37    | CRS AL adj      | 246   | NFHS 5    | 37    | CRS AL adj      | 156   |
| Daman & Diu       | NFHS 5    | 37    | CRS AL adj      | 219   | NFHS 5    | 37    | CRS AL adj      | 119   |

For Goa, Lakshadweep, Puducherry and Tripura, the age-specific death rates from the CRS data showed plausible trends and were considered to be complete, therefore directly used for our mortality assessment without any adjustments. For Chandigarh, the age-specific death rates from the SRS 2018 data for Delhi were used to estimate the numbers of deaths that would have occurred during 2019.

As mentioned above, the predictions for these 9 locations were based on the WHO international relational standard of the MODMATCH software program. The WHO international standard does not include any life tables for Indian populations. In future, selected adjusted life tables constructed for States / UTs with higher quality CRS data and from Sample Registration System data could also be incorporated to establish a national standard to appropriately reflect age-specific mortality trends and relationships for India.

APPENDIX TABLE 4: 95% Uncertainty intervals for estimates of life expectancy at birth and deaths for broad age groups by sex for India &amp; States, 2019

| LOCATION          | MALES |      |      |               |       |       |                |       |       |                 |        |        |             |        |        |
|-------------------|-------|------|------|---------------|-------|-------|----------------|-------|-------|-----------------|--------|--------|-------------|--------|--------|
|                   | LE    |      |      | Deaths 0 to 4 |       |       | Deaths 5 to 29 |       |       | Deaths 30 to 69 |        |        | Deaths 70 + |        |        |
|                   | PE    | LL   | UL   | PE            | LL    | UL    | PE             | LL    | UL    | PE              | LL     | UL     | PE          | LL     | UL     |
| Andhra Pradesh    | 66.8  | 66.7 | 66.9 | 12787         | 12565 | 13011 | 12593          | 12369 | 12822 | 146068          | 145350 | 146813 | 89508       | 85817  | 89984  |
| Arunachal Pradesh | 64.4  | 64.0 | 64.8 | 695           | 646   | 748   | 370            | 332   | 406   | 3284            | 3174   | 3392   | 2106        | 1961   | 2144   |
| Assam             | 67.8  | 67.7 | 67.9 | 14475         | 14250 | 14693 | 5409           | 5261  | 5550  | 67274           | 66793  | 67749  | 44607       | 42848  | 44921  |
| Bihar             | 67.0  | 67.0 | 67.1 | 81935         | 81426 | 82472 | 31115          | 30767 | 31466 | 202740          | 201907 | 203635 | 150980      | 144900 | 153718 |
| Chhattisgarh      | 63.1  | 63.0 | 63.1 | 14349         | 14116 | 14581 | 10618          | 10427 | 10810 | 76047           | 75550  | 76556  | 36601       | 35421  | 36862  |
| Goa               | 64.4  | 64.1 | 64.8 | 140           | 117   | 163   | 445            | 402   | 487   | 4503            | 4385   | 4624   | 3121        | 2891   | 3197   |
| Gujarat           | 67.1  | 67.1 | 67.2 | 21014         | 20754 | 21272 | 20537          | 20258 | 20811 | 156619          | 155866 | 157318 | 100707      | 95976  | 101132 |
| Haryana           | 66.5  | 66.4 | 66.6 | 9788          | 9583  | 9965  | 8083           | 7901  | 8254  | 68867           | 68369  | 69343  | 45190       | 42951  | 46488  |
| Himachal Pradesh  | 72.3  | 72.1 | 72.4 | 1106          | 1040  | 1167  | 1450           | 1377  | 1525  | 11732           | 11538  | 11937  | 13744       | 12934  | 13925  |
| Jammu & Kashmir   | 72.2  | 72.0 | 72.3 | 2629          | 2523  | 2726  | 1643           | 1568  | 1723  | 22024           | 21732  | 22303  | 17101       | 16003  | 17302  |
| Jharkhand         | 68.3  | 68.2 | 68.3 | 20101         | 19835 | 20367 | 7447           | 7288  | 7613  | 58317           | 57834  | 58779  | 44859       | 43521  | 45357  |
| Karnataka         | 66.4  | 66.3 | 66.4 | 13058         | 12824 | 13301 | 19265          | 19013 | 19555 | 176733          | 175971 | 177513 | 112682      | 108535 | 113128 |
| Kerala            | 72.2  | 72.1 | 72.3 | 2663          | 2557  | 2763  | 4930           | 4798  | 5067  | 70940           | 70418  | 71434  | 73531       | 69264  | 73953  |
| Madhya Pradesh    | 64.1  | 64.0 | 64.1 | 53957         | 53487 | 54386 | 32257          | 31924 | 32589 | 192622          | 191894 | 193453 | 107919      | 102887 | 108390 |
| Maharashtra       | 71.5  | 71.4 | 71.5 | 19284         | 19011 | 19562 | 25541          | 25235 | 25855 | 223855          | 222992 | 224724 | 176877      | 170609 | 180538 |
| Manipur           | 66.5  | 66.3 | 66.8 | 860           | 802   | 920   | 1075           | 1012  | 1145  | 5814            | 5670   | 5957   | 3723        | 3495   | 3790   |
| Meghalaya         | 64.6  | 64.4 | 64.9 | 1199          | 1132  | 1260  | 1503           | 1423  | 1580  | 6434            | 6287   | 6584   | 3959        | 3727   | 4029   |
| Mizoram           | 66.2  | 65.8 | 66.6 | 265           | 233   | 298   | 435            | 396   | 475   | 2515            | 2425   | 2615   | 1370        | 1266   | 1396   |
| Nagaland          | 70.0  | 69.7 | 70.3 | 638           | 589   | 685   | 298            | 263   | 332   | 2874            | 2771   | 2970   | 2382        | 2103   | 2338   |
| Odisha            | 66.5  | 66.4 | 66.6 | 15614         | 11962 | 12386 | 12161          | 11962 | 12386 | 112611          | 111958 | 113246 | 78847       | 75401  | 79306  |

APPENDIX TABLE 4: 95% Uncertainty intervals for estimates of life expectancy at birth and deaths for broad age groups by sex for India &amp; States, 2019

| LOCATION                    | MALES |       |       |               |        |        |                |        |        |                 |         |         |             |         |         |
|-----------------------------|-------|-------|-------|---------------|--------|--------|----------------|--------|--------|-----------------|---------|---------|-------------|---------|---------|
|                             | LE    |       |       | Deaths 0 to 4 |        |        | Deaths 5 to 29 |        |        | Deaths 30 to 69 |         |         | Deaths 70 + |         |         |
|                             | PE    | LL    | UL    | PE            | LL     | UL     | PE             | LL     | UL     | PE              | LL      | UL      | PE          | LL      | UL      |
| <b>Punjab</b>               | 69.6  | 69.5  | 69.7  | 4896          | 4759   | 5035   | 6711           | 6544   | 6879   | 76596           | 76094   | 77152   | 45843       | 43832   | 45843   |
| <b>Rajasthan</b>            | 65.9  | 65.9  | 66.0  | 34552         | 34180  | 34885  | 20563          | 20270  | 20840  | 166524          | 165734  | 167237  | 105283      | 99857   | 105283  |
| <b>Sikkim</b>               | 72.4  | 71.9  | 73.0  | 78            | 61     | 94     | 110            | 91     | 131    | 977             | 921     | 1041    | 1484        | 1345    | 1541    |
| <b>Tamil Nadu</b>           | 67.9  | 67.9  | 68.0  | 9083          | 8899   | 9261   | 18070          | 17808  | 18337  | 213212          | 212396  | 214039  | 146238      | 139287  | 146238  |
| <b>Telangana</b>            | 69.4  | 69.3  | 69.5  | 8189          | 8017   | 8366   | 4780           | 4650   | 4906   | 103643          | 103117  | 104170  | 30663       | 29516   | 30960   |
| <b>Tripura</b>              | 62.9  | 62.7  | 63.1  | 1642          | 1568   | 1721   | 877            | 817    | 935    | 10474           | 10290   | 10657   | 6629        | 6195    | 6725    |
| <b>Uttar Pradesh</b>        | 66.3  | 66.3  | 66.4  | 120119        | 119404 | 120788 | 63356          | 62874  | 63833  | 414044          | 412761  | 415219  | 300603      | 289001  | 307449  |
| <b>Uttarkhand</b>           | 68.4  | 68.2  | 68.5  | 3305          | 3198   | 3410   | 1989           | 1906   | 2072   | 20582           | 20329   | 20857   | 20687       | 19611   | 20906   |
| <b>West Bengal</b>          | 70.7  | 70.6  | 70.7  | 17633         | 17365  | 17888  | 15180          | 14931  | 15433  | 203083          | 202261  | 203917  | 132415      | 125502  | 132998  |
| <b>A &amp; N Islands</b>    | 67.5  | 66.8  | 68.2  | 68            | 52     | 84     | 120            | 99     | 141    | 987             | 930     | 1050    | 786         | 714     | 825     |
| <b>Chandigarh</b>           | 73.7  | 73.3  | 74.1  | 157           | 134    | 179    | 185            | 159    | 211    | 1373            | 1299    | 1443    | 2130        | 1871    | 2229    |
| <b>Dadra &amp; N Haveli</b> | 65.6  | 64.9  | 66.1  | 198           | 171    | 224    | 257            | 225    | 290    | 1348            | 1278    | 1416    | 862         | 787     | 902     |
| <b>Daman and Diu</b>        | 66.7  | 66.1  | 67.4  | 176           | 151    | 201    | 205            | 178    | 233    | 1067            | 1008    | 1130    | 283         | 671     | 782     |
| <b>Delhi</b>                | 73.6  | 72.7  | 72.9  | 3141          | 3032   | 3248   | 2986           | 2882   | 3096   | 25391           | 25077   | 25706   | 19618       | 18951   | 19383   |
| <b>Lakshadweep</b>          | 78.4  | 76.6  | 80.6  | 6             | 2      | 11     | 4              | 1      | 8      | 80              | 94      | 131     | 88          | 68      | 103     |
| <b>Puducherry</b>           | 63.8  | 63.4  | 64.2  | 375           | 339    | 413    | 487            | 443    | 530    | 4909            | 4787    | 5051    | 2291        | 2105    | 2362    |
| <b>INDIA</b>                | 67.51 | 67.49 | 67.52 | 490206        | 488959 | 491498 | 333070         | 331954 | 334108 | 2856307         | 2853159 | 2859389 | 1926175     | 1846342 | 1928279 |

APPENDIX TABLE 4:

| LOCATION          | FEMALES |      |      |               |       |       |                |       |       |                 |        |        |             |        |        |
|-------------------|---------|------|------|---------------|-------|-------|----------------|-------|-------|-----------------|--------|--------|-------------|--------|--------|
|                   | LE      |      |      | Deaths 0 to 4 |       |       | Deaths 5 to 29 |       |       | Deaths 30 to 69 |        |        | Deaths 70 + |        |        |
|                   | PE      | LL   | UL   | PE            | LL    | UL    | PE             | LL    | UL    | PE              | LL     | UL     | PE          | LL     | UL     |
| Andhra Pradesh    | 73.2    | 73.1 | 73.3 | 11017         | 10816 | 11211 | 7495           | 7311  | 7652  | 83107           | 82588  | 83644  | 81905       | 80164  | 81905  |
| Arunachal Pradesh | 68.7    | 68.3 | 69.2 | 732           | 681   | 784   | 232            | 202   | 260   | 1714            | 1639   | 1797   | 1424        | 1303   | 1455   |
| Assam             | 67.4    | 67.3 | 67.5 | 15577         | 15329 | 15800 | 8622           | 8455  | 8801  | 66344           | 65879  | 66780  | 32285       | 31060  | 32145  |
| Bihar             | 68.3    | 68.2 | 68.4 | 74296         | 73728 | 74844 | 27446          | 27127 | 27788 | 164286          | 163519 | 165031 | 123341      | 117500 | 126003 |
| Chhattisgarh      | 68.3    | 68.2 | 68.4 | 13290         | 13085 | 13508 | 8352           | 8173  | 8530  | 48121           | 47732  | 48521  | 36453       | 35171  | 36453  |
| Goa               | 71.6    | 71.3 | 71.9 | 108           | 89    | 129   | 147            | 123   | 172   | 1934            | 1849   | 2011   | 3453        | 3202   | 3524   |
| Gujarat           | 73.0    | 72.9 | 73.0 | 16358         | 16114 | 16604 | 12003          | 11806 | 12221 | 79891           | 79340  | 80413  | 99912       | 94892  | 99912  |
| Haryana           | 71.9    | 71.8 | 72.0 | 8346          | 8178  | 8538  | 4418           | 4281  | 4549  | 41382           | 41020  | 41772  | 33414       | 31401  | 34699  |
| Himachal Pradesh  | 76.1    | 76.0 | 76.3 | 1148          | 1081  | 1214  | 1027           | 968   | 1091  | 7282            | 7125   | 7448   | 13620       | 12593  | 13620  |
| Jammu & Kashmir   | 75.7    | 75.5 | 75.9 | 1925          | 1840  | 2009  | 1220           | 1148  | 1288  | 14310           | 14061  | 14549  | 13776       | 13061  | 13776  |
| Jharkhand         | 69.3    | 69.2 | 69.4 | 15463         | 15208 | 15707 | 7197           | 7035  | 7361  | 55956           | 55504  | 56395  | 44942       | 43153  | 46268  |
| Karnataka         | 71.7    | 71.6 | 71.7 | 13855         | 13611 | 14104 | 11668          | 11468 | 11889 | 89977           | 89452  | 90536  | 112718      | 109027 | 114306 |
| Kerala            | 78.3    | 78.2 | 78.4 | 2081          | 1989  | 2168  | 1631           | 1554  | 1711  | 36342           | 35985  | 36687  | 86087       | 78771  | 86087  |
| Madhya Pradesh    | 69.8    | 69.8 | 69.9 | 45332         | 44909 | 45731 | 17092          | 16836 | 17343 | 95026           | 94422  | 95649  | 114661      | 108871 | 114661 |
| Maharashtra       | 74.6    | 74.5 | 74.6 | 18626         | 18351 | 18887 | 25074          | 24768 | 25390 | 157630          | 156897 | 158424 | 155821      | 148287 | 161456 |
| Manipur           | 72.8    | 72.5 | 73.1 | 807           | 754   | 859   | 547            | 504   | 595   | 2755            | 2653   | 2848   | 2385        | 2195   | 2441   |
| Meghalaya         | 70.3    | 70.0 | 70.6 | 1155          | 1090  | 1221  | 999            | 941   | 1065  | 3345            | 3234   | 3453   | 2717        | 2519   | 2778   |
| Mizoram           | 72.7    | 72.2 | 73.3 | 251           | 221   | 282   | 235            | 206   | 265   | 1076            | 1013   | 1140   | 1015        | 924    | 1063   |
| Nagaland          | 73.6    | 73.2 | 74.1 | 163           | 139   | 190   | 602            | 554   | 648   | 1704            | 1625   | 1789   | 1556        | 1342   | 1532   |
| Odisha            | 71.0    | 70.9 | 71.0 | 15228         | 14993 | 15482 | 10014          | 9832  | 10212 | 77804           | 77268  | 78347  | 73833       | 71287  | 73833  |

APPENDIX TABLE 4:

| LOCATION                    | FEMALES |       |       |               |        |        |                |        |        |                 |         |         |             |         |         |
|-----------------------------|---------|-------|-------|---------------|--------|--------|----------------|--------|--------|-----------------|---------|---------|-------------|---------|---------|
|                             | LE      |       |       | Deaths 0 to 4 |        |        | Deaths 5 to 29 |        |        | Deaths 30 to 69 |         |         | Deaths 70 + |         |         |
|                             | PE      | LL    | UL    | PE            | LL     | UL     | PE             | LL     | UL     | PE              | LL      | UL      | PE          | LL      | UL      |
| <b>Punjab</b>               | 74.5    | 74.4  | 74.6  | 4115          | 4004   | 4239   | 4473           | 4343   | 4599   | 52514           | 52089   | 52940   | 35177       | 33000   | 35177   |
| <b>Rajasthan</b>            | 71.6    | 71.5  | 71.6  | 30897         | 30557  | 31220  | 10764          | 10560  | 10972  | 94320           | 93735   | 94884   | 99538       | 93497   | 99538   |
| <b>Sikkim</b>               | 77.1    | 76.5  | 77.7  | 66            | 51     | 82     | 59             | 45     | 74     | 467             | 426     | 510     | 1115        | 992     | 1167    |
| <b>Tamil Nadu</b>           | 73.9    | 73.9  | 74.0  | 7887          | 7723   | 8058   | 10028          | 9836   | 10228  | 121161          | 120505  | 121828  | 129879      | 122870  | 133408  |
| <b>Telangana</b>            | 73.8    | 73.7  | 73.9  | 7710          | 7530   | 7891   | 3441           | 3332   | 3551   | 75809           | 75371   | 76302   | 28485       | 26914   | 29766   |
| <b>Tripura</b>              | 66.9    | 66.7  | 67.2  | 1529          | 1461   | 1602   | 653            | 606    | 705    | 5784            | 5648    | 5930    | 5196        | 4846    | 5301    |
| <b>Uttar Pradesh</b>        | 68.2    | 68.2  | 68.3  | 110710        | 110045 | 111329 | 52186          | 51724  | 52635  | 334685          | 333668  | 335821  | 262604      | 253796  | 267378  |
| <b>Uttarkhand</b>           | 73.5    | 73.4  | 73.7  | 2650          | 2548   | 2749   | 1533           | 1457   | 1607   | 11052           | 10834   | 11261   | 18568       | 17299   | 19777   |
| <b>West Bengal</b>          | 73.9    | 73.8  | 73.9  | 16519         | 16268  | 16769  | 11585          | 11388  | 11799  | 124962          | 124311  | 125670  | 125900      | 120693  | 128431  |
| <b>A &amp; N Islands</b>    | 72.7    | 71.8  | 73.5  | 57            | 43     | 72     | 71             | 55     | 88     | 521             | 476     | 560     | 566         | 503     | 604     |
| <b>Chandigarh</b>           | 78.6    | 78.0  | 79.3  | 112           | 90     | 133    | 128            | 106    | 151    | 984             | 925     | 1043    | 1163        | 1036    | 1220    |
| <b>Dadra &amp; N Haveli</b> | 70.4    | 69.7  | 71.3  | 126           | 106    | 149    | 106            | 86     | 125    | 627             | 581     | 678     | 639         | 565     | 676     |
| <b>Daman and Diu</b>        | 72.5    | 71.5  | 73.5  | 73            | 56     | 90     | 43             | 31     | 56     | 283             | 251     | 315     | 300         | 296     | 374     |
| <b>Delhi</b>                | 78.6    | 78.5  | 78.8  | 2295          | 2200   | 2385   | 2214           | 2122   | 2304   | 17667           | 17415   | 17942   | 14899       | 14090   | 15313   |
| <b>Lakshadweep</b>          | 82.6    | 80.2  | 85.1  | 5             | 1      | 9      | 2              | 0      | 6      | 61              | 46      | 77      | 88          | 68      | 104     |
| <b>Puducherry</b>           | 72.5    | 72.1  | 72.9  | 250           | 220    | 282    | 341            | 305    | 379    | 2280            | 2190    | 2379    | 2320        | 2136    | 2396    |
| <b>INDIA</b>                | 71.37   | 71.36 | 71.39 | 441208        | 439979 | 442474 | 243217         | 242217 | 244150 | 1873258         | 1870845 | 1875782 | 1761803     | 1683114 | 1763828 |

**Appendix TABLE 5: Adjustment factors (with sources) for correction of under-reporting of deaths in CRS data by sex and age for india and States, 2019**

| Location          | MALE      |       |          |            |          |        | FEMALE    |       |          |            |          |        |
|-------------------|-----------|-------|----------|------------|----------|--------|-----------|-------|----------|------------|----------|--------|
|                   | Source    | < 5 y | Source   | 15 to 59 y | Source   | ≥ 60 y | Source    | < 5 y | Source   | 15 to 59 y | Source   | ≥ 60 y |
| Andhra Pradesh    | SRS 2018  | 2.9   | CRS      | 1          | AL       | 1.09   | SRS 2018  | 3.2   | CRS      | 1          | SRS 2018 | 1.31   |
| Arunachal Pradesh | ASSAM SRS | >10   | MODMATCH | 1.7        | MODMATCH | 4.0    | ASSAM SRS | >10   | MODMATCH | 2.9        | MODMATCH | 8.9    |
| Assam             | SRS 2018  | 7.1   | CRS      | 1          | SRS 2018 | 1.60   | SRS 2018  | 9.7   | SRS 2018 | 2.9        | SRS 2018 | 2.32   |
| Bihar             | NFHS5     | 7.5   | AL       | 1.49       | AL       | 2.8    | NFHS 5    | 8.9   | AL       | 2.2        | AL       | 3.4    |
| Chhattisgarh      | SRS 2018  | 3.3   | SRS 2018 | 1.16       | AL       | 1.16   | SRS 2018  | 4.2   | SRS 2018 | 1.24       | AL       | 1.25   |
| Goa               | CRS       | 1     | CRS      | 1          | CRS      | 1      | CRS       | 1     | CRS      | 1          | CRS      | 1      |
| Gujarat           | SRS 2018  | 1.9   | CRS      | 1          | AL       | 1.11   | SRS 2018  | 2.1   | CRS      | 1          | AL       | 1.10   |
| Haryana           | SRS 2018  | 7.3   | CRS      | 1          | AL       | 1.07   | SRS 2018  | 9.0   | CRS      | 1          | AL       | 1.23   |
| Himachal Pradesh  | SRS 2018  | 2.0   | CRS      | 1          | SRS2018  | 1.17   | SRS 2018  | 2.6   | SRS 2018 | 1.22       | AL       | 1.24   |
| Jammu & Kashmir   | SRS 2018  | 1.1   | SRS 2018 | 7.2        | SRS 2018 | 1.5    | SRS 2018  | 1.1   | SRS 2018 | 5.3        | AL       | 1.42   |
| Jharkhand         | NFHS 4    | 5.8   | SRS 2018 | 1.24       | SRS 2018 | 2.6    | NFHS 4    | 5.2   | SRS 2018 | 1.9        | SRS 2018 | 3.5    |
| Karnataka         | SRS 2018  | 1.7   | CRS      | 1          | AL       | 1.07   | SRS 2018  | 2.4   | CRS      | 1          | AL       | 1.21   |
| Kerala            | SRS 2018  | 1.6   | CRS      | 1          | AL       | 1.02   | SRS 2018  | 1.50  | CRS      | 1          | AL       | 1.03   |
| Madhya Pradesh    | SRS 2018  | 6.0   | CRS      | 1          | AL       | 1.24   | SRS 2018  | 6.4   | CRS      | 1          | SRS 2018 | 1.81   |
| Maharashtra       | SRS 2018  | 1.7   | CRS      | 1          | AL       | 1.10   | SRS 2018  | 2.2   | SRS 2018 | 1.23       | SRS 2018 | 1.08   |
| Manipur           | NFHS 5    | >10   | MODMATCH | 5.1        | MODMATCH | >10    | NFHS 5    | >10   | MODMATCH | 5.2        | MODMATCH | >10    |
| Meghalaya         | NFHS 5    | 1     | CRS      | 1          | MODMATCH | 2.5    | NFHS 5    | 1     | CRS      | 1          | MODMATCH | 1.8    |
| Mizoram           | NFHS 5    | 1.6   | CRS      | 1          | MODMATCH | 1.32   | NFHS 5    | 1.02  | CRS      | 1          | MODMATCH | 1.04   |
| Nagaland          | NFHS 5    | >10   | MODMATCH | 2.5        | MODMATCH | >10    | NFHS 5    | >10   | MODMATCH | 3.2        | MODMATCH | >10    |
| Odisha            | SRS 2018  | 1.9   | CRS      | 1          | SRS 2018 | 1.24   | SRS 2018  | 2.5   | CRS      | 1          | SRS 2018 | 1.39   |

**Appendix TABLE 5: Adjustment factors (with sources) for correction of under-reporting of deaths in CRS data by sex and age for india and States, 2019**

| Location         | MALE      |       |           |            |           |        | FEMALE    |       |           |            |           |        |
|------------------|-----------|-------|-----------|------------|-----------|--------|-----------|-------|-----------|------------|-----------|--------|
|                  | Source    | < 5 y | Source    | 15 to 59 y | Source    | ≥ 60 y | Source    | < 5 y | Source    | 15 to 59 y | Source    | ≥ 60 y |
| Punjab           | SRS 2018  | 3.2   | CRS       | 1          | AL        | 1.09   | SRS 2018  | 3.2   | CRS       | 1          | AL        | 1.08   |
| Rajasthan        | SRS 2018  | 4.2   | CRS       | 1          | AL        | 1.07   | SRS 2018  | 5.8   | CRS       | 1          | AL        | 1.40   |
| Sikkim           | NFHS 5    | 1.49  | CRS       | 1          | MODMATCH  | 1.65   | NFHS 5    | 1.7   | CRS       | 1          | MODMATCH  | 1.50   |
| Tamil Nadu       | SRS 2018  | 1.3   | CRS       | 1          | AL        | 1.04   | SRS 2018  | 1.5   | CRS       | 1          | AL        | 1.04   |
| Telangana        | SRS 2018  | 2.1   | CRS       | 1          | AL        | 1.10   | SRS 2018  | 2.4   | CRS       | 1          | AL        | 1.41   |
| Tripura          | NFHS 5    | 3.5   | CRS       | 1          | CRS       | 1      | NFHS 5    | 4.6   | CRS       | 1          | CRS       | 1      |
| Uttar Pradesh    | SRS 2018  | 5.1   | SRS 2018  | 1.26       | SRS 2018  | 2.5    | SRS 2018  | 5.7   | SRS 2018  | 1.4        | SRS 2018  | 2.9    |
| Uttarkhand       | SRS 2018  | 3.3   | CRS       | 1          | AL        | 1.14   | SRS 2018  | 3.5   | SRS 2018  | 1.24       | AL        | 1.24   |
| West Bengal      | SRS 2018  | 2.5   | CRS       | 1          | AL        | 1.13   | SRS 2018  | 3.1   | CRS       | 1          | SRS 2018  | 1.29   |
| A & N Islands    | NFHS 5    | 1.22  | CRS       | 1          | MODMATCH  | 1.69   | NFHS 5    | 1.4   | CRS       | 1          | MODMATCH  | 1.55   |
| Chandigarh       | SRS Delhi | NA    | SRS Delhi | NA         | SRS Delhi | NA     | SRS Delhi | NA    | SRS Delhi | NA         | SRS Delhi | NA     |
| Dadra & N Haveli | NFHS 5    | 1.16  | MODMATCH  | 1.24       | MODMATCH  | 2.1    | CRS       | 1     | MODMATCH  | 1.15       | MODMATCH  | 1.89   |
| Daman and Diu    | NFHS 5    | 5.2   | MODMATCH  | 1.48       | AL        | 1.48   | NFHS 5    | 2.6   | AL        | 1.4        | AL        | 1.40   |
| Delhi            | SRS 2018  | NA    | SRS 2018  | NA         | SRS 2018  | NA     | SRS 2018  | NA    | SRS 2018  | NA         | SRS 2018  | NA     |
| Lakshadweep      | CRS       | 1     | CRS       | 1          | CRS       | 1      | CRS       | 1     | CRS       | 1          | CRS       | 1      |
| Puducherry       | CRS       | 1     | CRS       | 1          | CRS       | 1      | CRS       | 1     | CRS       | 1          | CRS       | 1      |
| INDIA            |           | 3.42  |           | 1.06       |           | 1.32   |           | 4.06  |           | 1.17       |           | 1.45   |

|            |              |              |       |
|------------|--------------|--------------|-------|
| Negligible | Minor        | Moderate     | High  |
| 1 to 1.10  | 1.11 to 1.25 | 1.26 to 1.50 | >1.51 |



Appendix Table 6 : CRS reported and final estimates of deaths by sex and age for India and States / UTs, 2019

| Location          | Males  |       |          |      |          |        |        |        |        |        |
|-------------------|--------|-------|----------|------|----------|--------|--------|--------|--------|--------|
|                   | 0 to 4 |       | 5 to `14 |      | 15 to 59 |        | 60+    |        | Total  |        |
|                   | RAW    | Adj   | RAW      | Adj  | RAW      | Adj    | RAW    | Adj    | RAW    | Adj    |
| Andhra Pradesh    | 4487   | 12787 | 1070     | 1070 | 104259   | 104259 | 134803 | 142839 | 244619 | 260955 |
| Arunachal Pradesh | 17     | 695   | 27       | 47   | 1507     | 2630   | 1092   | 3083   | 2643   | 6456   |
| Assam             | 2039   | 14475 | 1725     | 1725 | 33064    | 33064  | 65717  | 82501  | 102545 | 131766 |
| Bihar             | 10968  | 81935 | 6563     | 6563 | 90361    | 137816 | 115442 | 240457 | 223334 | 466770 |
| Chhattisgarh      | 4388   | 14349 | 1715     | 1715 | 49899    | 58291  | 54733  | 63260  | 110735 | 137616 |
| Goa               | 140    | 140   | 31       | 31   | 3193     | 3193   | 4845   | 4845   | 8209   | 8209   |
| Gujarat           | 11060  | 21014 | 2959     | 2959 | 115766   | 115766 | 146448 | 159138 | 276232 | 298876 |
| Haryana           | 1339   | 9788  | 1330     | 1330 | 38356    | 38356  | 78335  | 82454  | 119360 | 131928 |
| Himachal Pradesh  | 553    | 1106  | 199      | 199  | 8196     | 8196   | 16515  | 18531  | 25463  | 28032  |
| Jammu & Kashmir   | 2657   | 2629  | 119      | 494  | 1969     | 14544  | 19677  | 25729  | 24421  | 43396  |
| Jharkhand         | 3487   | 20101 | 2087     | 1179 | 29007    | 37699  | 36427  | 71745  | 71008  | 130724 |
| Karnataka         | 7914   | 13058 | 3604     | 3604 | 120265   | 120265 | 176153 | 184810 | 307936 | 321738 |
| Kerala            | 1675   | 2663  | 566      | 566  | 37330    | 37330  | 108829 | 111505 | 148399 | 152063 |
| Madhya Pradesh    | 8993   | 53957 | 5069     | 5069 | 132787   | 132787 | 162870 | 194942 | 309719 | 386756 |
| Maharashtra       | 11687  | 19284 | 5340     | 5340 | 139617   | 139617 | 244448 | 281316 | 401093 | 445557 |
| Manipur           | 69     | 860   | 37       | 186  | 882      | 4540   | 1017   | 5885   | 2005   | 11471  |
| Meghalaya         | 1713   | 1199  | 470      | 470  | 5401     | 5401   | 3513   | 6025   | 11097  | 13095  |
| Mizoram           | 171    | 265   | 68       | 68   | 2168     | 2168   | 1645   | 2084   | 4052   | 4585   |
| Nagaland          | 26     | 670   | 5        | 23   | 821      | 2103   | 780    | 3588   | 1632   | 6385   |
| Odisha            | 8132   | 15614 | 2282     | 2282 | 70816    | 70816  | 114661 | 130522 | 195891 | 219233 |
| Punjab            | 1530   | 4896  | 888      | 888  | 45444    | 45444  | 76663  | 82818  | 124525 | 134045 |
| Rajasthan         | 8149   | 34552 | 2601     | 2601 | 113496   | 113496 | 160737 | 176273 | 284983 | 326922 |

Appendix Table 6 : CRS reported and final estimates of deaths by sex and age for India and States / UTs, 2019

| Location         | Males  |        |          |       |          |         |         |         |         |         |
|------------------|--------|--------|----------|-------|----------|---------|---------|---------|---------|---------|
|                  | 0 to 4 |        | 5 to `14 |       | 15 to 59 |         | 60+     |         | Total   |         |
|                  | RAW    | Adj    | RAW      | Adj   | RAW      | Adj     | RAW     | Adj     | RAW     | Adj     |
| Sikkim           | 51     | 78     | 20       | 20    | 647      | 647     | 1303    | 1905    | 2021    | 2650    |
| Tamil Nadu       | 7152   | 9083   | 2058     | 2058  | 142565   | 142565  | 225655  | 232896  | 377430  | 386602  |
| Telangana        | 3918   | 8189   | 925      | 925   | 34415    | 35566   | 93053   | 102594  | 132311  | 147274  |
| Tripura          | 468    | 1642   | 106      | 106   | 7036     | 7036    | 10838   | 10838   | 18448   | 19622   |
| Uttar Pradesh    | 23507  | 120119 | 18871    | 18871 | 218476   | 279189  | 274163  | 479943  | 535017  | 898121  |
| Uttarkhand       | 1017   | 3305   | 390      | 390   | 13043    | 13043   | 26067   | 29825   | 40517   | 46563   |
| West Bengal      | 7168   | 17633  | 1699     | 1699  | 122068   | 126249  | 195819  | 222730  | 326754  | 368312  |
| A & N Islands    | 56     | 68     | 17       | 17    | 731      | 731     | 812     | 1145    | 1616    | 1961    |
| Chandigarh*      | 1728   | 157    | 318      | 43    | 7766     | 890     | 5137    | 2755    | 14949   | 3844    |
| Dadra & N Haveli | 170    | 198    | 30       | 44    | 853      | 1049    | 585     | 1374    | 1638    | 2664    |
| Daman and Diu    | 22     | 176    | 7        | 37    | 372      | 814     | 326     | 1164    | 727     | 2190    |
| Delhi*           | 6676   | 3141   | 1625     | 744   | 41779    | 16745   | 39643   | 30505   | 89723   | 51135   |
| Lakshadweep      | 6      | 6      | 1        | 1     | 40       | 40      | 130     | 130     | 177     | 177     |
| Puducherry       | 375    | 375    | 59       | 59    | 3751     | 3751    | 3877    | 3877    | 8063    | 8063    |
| INDIA            | 143506 | 490206 | 64881    | 63424 | 1738147  | 1856096 | 2602758 | 3196031 | 4549292 | 5605758 |

\*Adjusted deaths for Chandigarh and Delhi are lower than CRS reported deaths as adjustment was based on SRS death rates for Delhi, which are measured for usual resident population only. This strategy was adopted since CRS deaths for Chandigarh and Delhi include sizeable numbers of deaths of non-residents

Appendix Table 6 :

| Location          | Females |       |          |       |          |        |        |        |        |        |
|-------------------|---------|-------|----------|-------|----------|--------|--------|--------|--------|--------|
|                   | 0 to 4  |       | 5 to `14 |       | 15 to 59 |        | 60+    |        | Total  |        |
|                   | RAW     | Adj   | RAW      | Adj   | RAW      | Adj    | RAW    | Adj    | RAW    | Adj    |
| Andhra Pradesh    | 3497    | 11017 | 948      | 948   | 54626    | 54626  | 97781  | 116932 | 156853 | 183523 |
| Arunachal Pradesh | 7       | 732   | 11       | 31    | 500      | 1428   | 329    | 1910   | 847    | 4101   |
| Assam             | 1606    | 15577 | 518      | 714   | 13600    | 40413  | 44789  | 66124  | 60512  | 122827 |
| Bihar             | 8381    | 74296 | 4566     | 10094 | 48934    | 105568 | 74134  | 199411 | 136015 | 389369 |
| Chhattisgarh      | 3164    | 13290 | 1297     | 1625  | 27884    | 34942  | 44974  | 56358  | 77319  | 106216 |
| Goa               | 108     | 108   | 27       | 27    | 1047     | 1047   | 4459   | 4459   | 5642   | 5642   |
| Gujarat           | 7980    | 16358 | 2487     | 2487  | 51861    | 51861  | 123712 | 137458 | 186040 | 208165 |
| Haryana           | 927     | 8346  | 911      | 911   | 19097    | 19097  | 48615  | 59206  | 69550  | 87560  |
| Himachal Pradesh  | 433     | 1148  | 156      | 185   | 3543     | 4321   | 14042  | 17423  | 18174  | 23077  |
| Jammu & Kashmir   | 1750    | 1925  | 148      | 481   | 1627     | 8993   | 16281  | 19832  | 19806  | 31231  |
| Jharkhand         | 2980    | 15463 | 1624     | 1806  | 16901    | 34136  | 26861  | 72152  | 48366  | 123557 |
| Karnataka         | 5773    | 13855 | 2988     | 2988  | 55505    | 55505  | 136382 | 155870 | 200648 | 228218 |
| Kerala            | 1387    | 2081  | 384      | 384   | 17458    | 17458  | 102925 | 106218 | 122154 | 126140 |
| Madhya Pradesh    | 7139    | 45332 | 3765     | 3765  | 64762    | 64762  | 107943 | 158251 | 183609 | 272111 |
| Maharashtra       | 8583    | 18626 | 3161     | 3719  | 82554    | 101422 | 198339 | 233384 | 292637 | 357150 |
| Manipur           | 31      | 807   | 14       | 134   | 417      | 2131   | 523    | 3422   | 985    | 6494   |
| Meghalaya         | 1266    | 1155  | 338      | 338   | 2869     | 2869   | 2728   | 3855   | 7201   | 8216   |
| Mizoram           | 257     | 251   | 46       | 46    | 922      | 913    | 1329   | 1367   | 2554   | 2577   |
| Nagaland          | 9       | 612   | 7        | 20    | 371      | 1246   | 251    | 2261   | 639    | 4139   |
| Odisha            | 6215    | 15228 | 2125     | 2125  | 44428    | 44428  | 94288  | 115098 | 147056 | 176879 |
| Punjab            | 1286    | 4115  | 680      | 680   | 27899    | 27899  | 58752  | 63584  | 88617  | 96278  |
| Rajasthan         | 5364    | 30897 | 1824     | 1824  | 51016    | 51016  | 108069 | 151783 | 166273 | 235519 |

Appendix Table 6 :

| Location         | Females |        |          |       |          |         |         |         |         |         |
|------------------|---------|--------|----------|-------|----------|---------|---------|---------|---------|---------|
|                  | 0 to 4  |        | 5 to `14 |       | 15 to 59 |         | 60+     |         | Total   |         |
|                  | RAW     | Adj    | RAW      | Adj   | RAW      | Adj     | RAW     | Adj     | RAW     | Adj     |
| Sikkim           | 37      | 66     | 13       | 13    | 278      | 278     | 959     | 1351    | 1287    | 1707    |
| Tamil Nadu       | 5155    | 7887   | 1594     | 1594  | 66881    | 68422   | 182837  | 191052  | 256467  | 268955  |
| Telangana        | 3267    | 7710   | 694      | 694   | 23575    | 23575   | 68447   | 83464   | 95983   | 115444  |
| Tripura          | 335     | 1529   | 119      | 119   | 3823     | 3823    | 7691    | 7691    | 11968   | 13162   |
| Uttar Pradesh    | 19457   | 110710 | 14964    | 14964 | 166905   | 238760  | 208254  | 395752  | 409579  | 760186  |
| Uttarkhand       | 749     | 2650   | 268      | 333   | 5553     | 6906    | 19227   | 23914   | 25796   | 33804   |
| West Bengal      | 5398    | 16519  | 1629     | 1629  | 72467    | 72467   | 145446  | 188350  | 224941  | 278966  |
| A & N Islands    | 40      | 57     | 16       | 16    | 333      | 333     | 611     | 809     | 1000    | 1216    |
| Chandigarh*      | 1115    | 112    | 258      | 22    | 3774     | 589     | 3485    | 1665    | 8632    | 2388    |
| Dadra & N Haveli | 145     | 126    | 27       | 25    | 376      | 440     | 519     | 907     | 1067    | 1498    |
| Daman and Diu    | 25      | 73     | 6        | 11    | 119      | 185     | 285     | 477     | 435     | 746     |
| Delhi*           | 4602    | 2295   | 1380     | 415   | 20797    | 10752   | 28748   | 23612   | 55527   | 37075   |
| Lakshadweep      | 5       | 5      | 1        | 1     | 25       | 25      | 126     | 126     | 157     | 157     |
| Puducherry       | 250     | 250    | 54       | 54    | 1647     | 1647    | 3241    | 3241    | 5192    | 5192    |
| INDIA            | 108726  | 441208 | 49048    | 55225 | 954373   | 1154283 | 1977381 | 2668769 | 3089528 | 4319485 |

\*Adjusted deaths for Chandigarh and Delhi are lower than CRS reported deaths as adjustment was based on SRS death rates for Delhi, which are measured for usual resident population only. This strategy was adopted since CRS deaths for Chandigarh and Delhi include sizeable numbers of deaths of non-residents

Appendix Table 7: Annual proportions of delayed registration by state during 2016 to 2019

| State/ UT         | 2016               |                         |               | 2017               |                         |               | 2018               |                         |               | 2019               |                         |               |
|-------------------|--------------------|-------------------------|---------------|--------------------|-------------------------|---------------|--------------------|-------------------------|---------------|--------------------|-------------------------|---------------|
|                   | Same calendar year | Previous calendar years | Delayed Reg % | Same calendar year | Previous calendar years | Delayed Reg % | Same calendar year | Previous calendar years | Delayed Reg % | Same calendar year | Previous calendar years | Delayed Reg % |
| Andhra Pradesh    | 280331             | 32954                   | 11%           | 345288             | 10258                   | 3%            | 364860             | 10917                   | 3%            | 391643             | 9829                    | 2%            |
| Arunachal Pradesh | 1044               | 1547                    | 60%           | 1457               | 1482                    | 50%           | 1775               | 2085                    | 54%           | 1198               | 2292                    | 66%           |
| Assam             | 121534             | 8880                    | 7%            | 126466             | 14546                   | 10%           | 134856             | 7749                    | 5%            | 157924             | 5133                    | 3%            |
| Bihar             | NA                 | NA                      | NA            |
| Chhattisgarh      | 168922             | 14063                   | 8%            | 161973             | 13062                   | 7%            | 165355             | 12194                   | 7%            | 173665             | 14546                   | 8%            |
| Goa               | 13130              | 183                     | 1%            | 13020              | 141                     | 1%            | 13072              | 176                     | 1%            | 13851              | 147                     | 1%            |
| Gujarat           | NA                 | NA                      | NA            | 384160             | 4156                    | 1%            | 425625             | 7631                    | 2%            | 452665             | 9619                    | 2%            |
| Haryana           | NA                 | NA                      | NA            |
| Himachal Pradesh  | NA                 | NA                      | NA            | 38598              | 516                     | 1%            | 41236              | 597                     | 1%            | 43036              | 597                     | 1%            |
| Jammu & Kashmir   | 36431              | 0                       | 0%            | 37171              | 13                      | 0%            | 39410              | 0                       | 0%            | 44227              | 0                       | 0%            |
| Jharkhand         | NA                 | NA                      | NA            |
| Karnataka         | 403323             | 17451                   | 4%            | 444797             | 36950                   | 8%            | 446615             | 36896                   | 8%            | 471484             | 37100                   | 7%            |
| Kerala            | 250694             | 5436                    | 2%            | 258116             | 5226                    | 2%            | 253720             | 4810                    | 2%            | 265449             | 5118                    | 2%            |
| Madhya Pradesh    | 313889             | 24698                   | 7%            | 344350             | 26188                   | 7%            | 387497             | 36760                   | 9%            | 444918             | 48410                   | 10%           |
| Maharashtra       | 625248             | 41200                   | 6%            | NA                 | NA                      | NA            | NA                 | NA                      | NA            | NA                 | NA                      | NA            |
| Manipur           | NA                 | NA                      | NA            | NA                 | NA                      | NA            | 4602               | 424                     | 8%            | 3260               | 629                     | 16%           |
| Meghalaya         | NA                 | NA                      | NA            | 13349              | 430                     | 3%            | 14151              | 628                     | 4%            | 17638              | 660                     | 4%            |
| Mizoram           | 6422               | 351                     | 5%            | 5522               | 3                       | 0%            | 5522               | 3                       | 0%            | 6606               | 0                       | 0%            |
| Nagaland          | 1196               | 941                     | 44%           | 1157               | 679                     | 37%           | 505                | 323                     | 39%           | 1338               | 928                     | 41%           |
| Odisha            | 319962             | 25565                   | 7%            | 301043             | 21617                   | 7%            | 308158             | 20641                   | 6%            | 318830             | 24117                   | 7%            |

Appendix Table 7: Annual proportions of delayed registration by state during 2016 to 2019

| State/ UT      | 2016               |                         |               | 2017               |                         |               | 2018               |                         |               | 2019               |                         |               |
|----------------|--------------------|-------------------------|---------------|--------------------|-------------------------|---------------|--------------------|-------------------------|---------------|--------------------|-------------------------|---------------|
|                | Same calendar year | Previous calendar years | Delayed Reg % | Same calendar year | Previous calendar years | Delayed Reg % | Same calendar year | Previous calendar years | Delayed Reg % | Same calendar year | Previous calendar years | Delayed Reg % |
| Punjab         | 210912             | 2666                    | 1%            | 207639             | 2759                    | 1%            | 211213             | 2021                    | 1%            | 213142             | 1903                    | 1%            |
| Rajasthan*     | 353151             | 63841                   | 15%           | 366258             | 58505                   | 14%           | 371830             | 71343                   | 16%           | 381494             | 69821                   | 15%           |
| Sikkim         | NA                 | NA                      | NA            |
| Tamil Nadu     | 534322             | 29303                   | 5%            | 561181             | 19315                   | 3%            | 556656             | 17350                   | 3%            | 612748             | 21149                   | 3%            |
| Telangana      | 202328             | 2589                    | 1%            | 176561             | 1783                    | 1%            | 133045             | 3483                    | 3%            | 224520             | 3774                    | 2%            |
| Tripura*       | NA                 | NA                      | NA            | 22562              | 3734                    | 14%           | 24427              | 4653                    | 16%           | 24658              | 5761                    | 19%           |
| Uttar Pradesh  | NA                 | NA                      | NA            | NA                 | NA                      | NA            | NA                 | NA                      | NA            | 800130             | 144465                  | 12%           |
| Uttarakhand*   | 34969              | 13259                   | 27%           | 28501              | 5430                    | 16%           | 39508              | 8386                    | 18%           | 58300              | 8013                    | 15%           |
| West Bengal    | NA                 | NA                      | NA            | 422112             | 20883                   | 5%            | 461476             | 29054                   | 6%            | 541585             | 10110                   | 2%            |
| A & N Islands  | 2351               | 84                      | 3%            | 2137               | 68                      | 3%            | 2237               | 67                      | 3%            | 2544               | 72                      | 3%            |
| Chandigarh     | 16506              | 64                      | 0%            | 21214              | 22                      | 0%            | 23306              | 24                      | 0%            | 23572              | 20                      | 0%            |
| D & N Haveli   | 1775               | 15                      | 1%            | 2051               | 29                      | 1%            | 2134               | 40                      | 2%            | 2684               | 21                      | 1%            |
| Daman & Diu    | 1208               | 42                      | 3%            | 1111               | 25                      | 2%            | 1148               | 21                      | 2%            | 1141               | 21                      | 2%            |
| Delhi          | 146076             | 1409                    | 1%            | 141204             | 1261                    | 1%            | 150671             | 1503                    | 1%            | NA                 | NA                      | NA            |
| Lakshadweep    | 314                | 7                       | 2%            | 350                | 1                       | 0%            | 312                | 2                       | 1%            | 335                | 1                       | 0%            |
| Puducherry     | 12426              | 34                      | 0%            | 13302              | 48                      | 0%            | 12780              | 59                      | 0%            | 13210              | 45                      | 0%            |
| <b>INDIA**</b> | <b>4058464</b>     | <b>286582</b>           | <b>7%</b>     | <b>4442650</b>     | <b>249130</b>           | <b>5%</b>     | <b>4597702</b>     | <b>279840</b>           | <b>6%</b>     | <b>5707795</b>     | <b>424301</b>           | <b>7%</b>     |

 NA: Not Available  
 Very high, modelled estimates used  
 \* Consistently high  
 \*\* Based on available data

APPENDIX TABLE 8: Estimated life tables by sex for India and States / Union Territories in 2019

**INDIA**

Estimated abridged life table for 2019

**MALES**

| <i>Age</i> | <i>x</i> | <i>n</i> | <i>ax</i> | <i>pop</i> | <i>death</i> | <i>Mx</i> | <i>qx</i> | <i>px</i> | <i>lx</i> | <i>dx</i> | <i>Lx</i> | <i>Tx</i> | <i>ex</i> |
|------------|----------|----------|-----------|------------|--------------|-----------|-----------|-----------|-----------|-----------|-----------|-----------|-----------|
| <1         | 0        | 1        | 0.1       | 12239902   | 322429       | 0.026342  | 0.025732  | 0.974268  | 100000    | 2573      | 97684     | 6750847   | 67.51     |
| 1-4        | 1        | 4        | 0.5       | 48168403   | 167777       | 0.003483  | 0.013836  | 0.986164  | 97427     | 1348      | 387011    | 6653163   | 68.29     |
| 5-9        | 5        | 5        | 0.5       | 62215707   | 22141        | 0.000356  | 0.001778  | 0.998222  | 96079     | 171       | 479967    | 6266152   | 65.22     |
| 10-14      | 10       | 5        | 0.5       | 61125832   | 41283        | 0.000675  | 0.003371  | 0.996629  | 95908     | 323       | 478731    | 5786185   | 60.33     |
| 15-19      | 15       | 5        | 0.5       | 64645537   | 60656        | 0.000938  | 0.00468   | 0.99532   | 95585     | 447       | 476805    | 5307454   | 55.53     |
| 20-24      | 20       | 5        | 0.5       | 66470880   | 86648        | 0.001304  | 0.006497  | 0.993503  | 95137     | 618       | 474141    | 4830649   | 50.78     |
| 25-29      | 25       | 5        | 0.5       | 62650910   | 122342       | 0.001953  | 0.009716  | 0.990284  | 94519     | 918       | 470300    | 4356508   | 46.09     |
| 30-34      | 30       | 5        | 0.5       | 56391840   | 139502       | 0.002474  | 0.012293  | 0.987707  | 93601     | 1151      | 465127    | 3886208   | 41.52     |
| 35-39      | 35       | 5        | 0.5       | 49815389   | 166551       | 0.003343  | 0.016578  | 0.983422  | 92450     | 1533      | 458419    | 3421081   | 37.00     |
| 40-44      | 40       | 5        | 0.5       | 44318747   | 212080       | 0.004785  | 0.023644  | 0.976356  | 90917     | 2150      | 449213    | 2962661   | 32.59     |
| 45-49      | 45       | 5        | 0.5       | 40101077   | 292035       | 0.007282  | 0.035761  | 0.964239  | 88768     | 3174      | 435903    | 2513448   | 28.31     |
| 50-54      | 50       | 5        | 0.5       | 35139262   | 324815       | 0.009244  | 0.045174  | 0.954826  | 85593     | 3867      | 418300    | 2077545   | 24.27     |
| 55-59      | 55       | 5        | 0.5       | 28993687   | 451467       | 0.015571  | 0.074939  | 0.925061  | 81727     | 6125      | 393323    | 1659244   | 20.30     |
| 60-64      | 60       | 5        | 0.5       | 22406496   | 527780       | 0.023555  | 0.111224  | 0.888776  | 75602     | 8409      | 356989    | 1265922   | 16.74     |
| 65-69      | 65       | 5        | 0.5       | 16785513   | 742077       | 0.044209  | 0.199047  | 0.800953  | 67193     | 13375     | 302531    | 908932.4  | 13.53     |
| 70-74      | 70       | 5        | 0.5       | 12513505   | 622158       | 0.049719  | 0.221111  | 0.778889  | 53819     | 11900     | 239344    | 606401.8  | 11.27     |
| 75-79      | 75       | 5        | 0.5       | 8241645    | 541130       | 0.065658  | 0.282001  | 0.717999  | 41919     | 11821     | 180041    | 367057.7  | 8.76      |
| 80-85      | 80       | 5        | 0.5       | 2937597    | 373865       | 0.127269  | 0.482748  | 0.517252  | 30098     | 14530     | 114164    | 187016.3  | 6.21      |
| 85+        | 85       | 0        | 0.5       | 1820449    | 389022       | 0.213695  | 1         | 0         | 15568     | 15568     | 72852     | 72851.81  | 4.68      |
| All ages   |          |          |           | 696982378  | 5605758      |           |           |           |           |           |           |           |           |

**INDIA**

Estimated abridged life table for 2019

**FEMALES**

| Age      | <i>x</i> | <i>n</i> | <i>ax</i> | <i>pop</i> | <i>death</i> | <i>Mx</i> | <i>qx</i> | <i>px</i> | <i>lx</i> | <i>dx</i> | <i>Lx</i> | <i>Tx</i> | <i>ex</i> |
|----------|----------|----------|-----------|------------|--------------|-----------|-----------|-----------|-----------|-----------|-----------|-----------|-----------|
| <1       | 0        | 1        | 0.1       | 11058031   | 284642       | 0.025741  | 0.025158  | 0.974842  | 100000    | 2516      | 97736     | 7137258   | 71.37     |
| 1-4      | 1        | 4        | 0.5       | 43384279   | 156566       | 0.003609  | 0.014332  | 0.985668  | 97484     | 1397      | 387143    | 7039522   | 72.21     |
| 5-9      | 5        | 5        | 0.5       | 55496264   | 25573        | 0.000461  | 0.002301  | 0.997699  | 96087     | 221       | 479883    | 6652380   | 69.23     |
| 10-14    | 10       | 5        | 0.5       | 56753733   | 29652        | 0.000522  | 0.002609  | 0.997391  | 95866     | 250       | 478704    | 6172497   | 64.39     |
| 15-19    | 15       | 5        | 0.5       | 59407430   | 47306        | 0.000796  | 0.003974  | 0.996026  | 95616     | 380       | 477129    | 5693793   | 59.55     |
| 20-24    | 20       | 5        | 0.5       | 60581376   | 64037        | 0.001057  | 0.005271  | 0.994729  | 95236     | 502       | 474924    | 5216663   | 54.78     |
| 25-29    | 25       | 5        | 0.5       | 57008914   | 76648        | 0.001344  | 0.0067    | 0.9933    | 94734     | 635       | 472083    | 4741739   | 50.05     |
| 30-34    | 30       | 5        | 0.5       | 52934716   | 74725        | 0.001412  | 0.007033  | 0.992967  | 94099     | 662       | 468841    | 4269656   | 45.37     |
| 35-39    | 35       | 5        | 0.5       | 48749389   | 96651        | 0.001983  | 0.009864  | 0.990136  | 93437     | 922       | 464882    | 3800815   | 40.68     |
| 40-44    | 40       | 5        | 0.5       | 44230627   | 119710       | 0.002706  | 0.013442  | 0.986558  | 92516     | 1244      | 459469    | 3335932   | 36.06     |
| 45-49    | 45       | 5        | 0.5       | 39812771   | 158394       | 0.003978  | 0.019696  | 0.980304  | 91272     | 1798      | 451866    | 2876463   | 31.52     |
| 50-54    | 50       | 5        | 0.5       | 34234717   | 236659       | 0.006913  | 0.033977  | 0.966023  | 89474     | 3040      | 439772    | 2424597   | 27.10     |
| 55-59    | 55       | 5        | 0.5       | 28023394   | 280153       | 0.009997  | 0.048767  | 0.951233  | 86434     | 4215      | 421634    | 1984825   | 22.96     |
| 60-64    | 60       | 5        | 0.5       | 22023974   | 366218       | 0.016628  | 0.079823  | 0.920177  | 82219     | 6563      | 394689    | 1563191   | 19.01     |
| 65-69    | 65       | 5        | 0.5       | 17541268   | 540748       | 0.030827  | 0.143107  | 0.856893  | 75656     | 10827     | 351214    | 1168503   | 15.44     |
| 70-74    | 70       | 5        | 0.5       | 13857973   | 537190       | 0.038764  | 0.176696  | 0.823304  | 64829     | 11455     | 295509    | 817289.1  | 12.61     |
| 75-79    | 75       | 5        | 0.5       | 9267107    | 508154       | 0.054834  | 0.241117  | 0.758883  | 53374     | 12869     | 234697    | 521780.3  | 9.78      |
| 80-85    | 80       | 5        | 0.5       | 3068447    | 333973       | 0.108841  | 0.4278    | 0.5722    | 40505     | 17328     | 159204    | 287082.8  | 7.09      |
| 85+      | 85       | 0        | 0.5       | 2110375    | 382485       | 0.18124   | 1         | 0         | 23177     | 23177     | 127879    | 127878.8  | 5.52      |
| All ages |          |          |           | 659544784  | 4319485      |           |           |           |           |           |           |           |           |



**ANDHRA PRADESH**

Estimated abridged life table for 2019

**MALES**

| <i>Age</i> | <i>x</i> | <i>n</i> | <i>ax</i> | <i>pop</i> | <i>death</i> | <i>Mx</i> | <i>qx</i> | <i>px</i> | <i>lx</i> | <i>dx</i> | <i>Lx</i> | <i>Tx</i> | <i>ex</i> |
|------------|----------|----------|-----------|------------|--------------|-----------|-----------|-----------|-----------|-----------|-----------|-----------|-----------|
| <1         | 0        | 1        | 0.1       | 364000     | 11477        | 0.031531  | 0.030661  | 0.969339  | 100000    | 3066      | 97241     | 6679894   | 66.80     |
| 1-4        | 1        | 4        | 0.5       | 1432000    | 1310         | 0.000915  | 0.003652  | 0.996348  | 96934     | 354       | 387028    | 6582654   | 67.91     |
| 5-9        | 5        | 5        | 0.5       | 1906000    | 517          | 0.000271  | 0.001354  | 0.998646  | 96580     | 131       | 482573    | 6195626   | 64.15     |
| 10-14      | 10       | 5        | 0.5       | 1908000    | 554          | 0.00029   | 0.00145   | 0.99855   | 96449     | 140       | 481896    | 5713053   | 59.23     |
| 15-19      | 15       | 5        | 0.5       | 2131000    | 1952         | 0.000916  | 0.004569  | 0.995431  | 96309     | 440       | 480446    | 5231157   | 54.32     |
| 20-24      | 20       | 5        | 0.5       | 2323000    | 3204         | 0.001379  | 0.006872  | 0.993128  | 95869     | 659       | 477699    | 4750711   | 49.55     |
| 25-29      | 25       | 5        | 0.5       | 2372000    | 6367         | 0.002684  | 0.013331  | 0.986669  | 95210     | 1269      | 472879    | 4273012   | 44.88     |
| 30-34      | 30       | 5        | 0.5       | 2292000    | 8250         | 0.0036    | 0.017837  | 0.982163  | 93941     | 1676      | 465516    | 3800134   | 40.45     |
| 35-39      | 35       | 5        | 0.5       | 2110000    | 13840        | 0.006559  | 0.032266  | 0.967734  | 92265     | 2977      | 453884    | 3334617   | 36.14     |
| 40-44      | 40       | 5        | 0.5       | 1908000    | 12483        | 0.006542  | 0.032185  | 0.967815  | 89288     | 2874      | 439257    | 2880733   | 32.26     |
| 45-49      | 45       | 5        | 0.5       | 1756000    | 18396        | 0.010476  | 0.051043  | 0.948957  | 86415     | 4411      | 421046    | 2441476   | 28.25     |
| 50-54      | 50       | 5        | 0.5       | 1566000    | 20137        | 0.012859  | 0.062293  | 0.937707  | 82004     | 5108      | 397248    | 2020430   | 24.64     |
| 55-59      | 55       | 5        | 0.5       | 1299000    | 19631        | 0.015112  | 0.072811  | 0.927189  | 76896     | 5599      | 370481    | 1623181   | 21.11     |
| 60-64      | 60       | 5        | 0.5       | 988000     | 24376        | 0.024672  | 0.116195  | 0.883805  | 71297     | 8284      | 335773    | 1252701   | 17.57     |
| 65-69      | 65       | 5        | 0.5       | 743000     | 28955        | 0.03897   | 0.177553  | 0.822447  | 63012     | 11188     | 287092    | 916928.1  | 14.55     |
| 70-74      | 70       | 5        | 0.5       | 590000     | 35315        | 0.059856  | 0.260324  | 0.739676  | 51824     | 13491     | 225394    | 629836.1  | 12.15     |
| 75-79      | 75       | 5        | 0.5       | 405000     | 27135        | 0.067     | 0.286938  | 0.713062  | 38333     | 10999     | 164168    | 404442.1  | 10.55     |
| 80-85      | 80       | 5        | 0.5       | 105612     | 11058        | 0.1047    | 0.4149    | 0.5851    | 27334     | 11341     | 108318    | 240274.1  | 8.79      |
| 85+        | 85       | 0        | 0.5       | 132015     | 16000        | 0.1212    | 1         | 0         | 15993     | 15993     | 131956    | 131956.4  | 8.25      |
| All ages   |          |          |           | 26330627   | 260955       |           |           |           |           |           |           |           |           |

**ANDHRA PRADESH**

Estimated abridged life table for 2019

**FEMALES**

| <i>Age</i> | <i>x</i> | <i>n</i> | <i>ax</i> | <i>pop</i> | <i>death</i> | <i>Mx</i> | <i>qx</i> | <i>px</i> | <i>lx</i> | <i>dx</i> | <i>Lx</i> | <i>Tx</i> | <i>ex</i> |
|------------|----------|----------|-----------|------------|--------------|-----------|-----------|-----------|-----------|-----------|-----------|-----------|-----------|
| <1         | 0        | 1        | 0.1       | 335000     | 9451         | 0.028213  | 0.027515  | 0.972485  | 100000    | 2751      | 97524     | 7321451   | 73.21     |
| 1-4        | 1        | 4        | 0.5       | 1318000    | 1565         | 0.001188  | 0.004739  | 0.995261  | 97249     | 461       | 388072    | 7223927   | 74.28     |
| 5-9        | 5        | 5        | 0.5       | 1739000    | 464          | 0.000267  | 0.001334  | 0.998666  | 96788     | 129       | 483616    | 6835855   | 70.63     |
| 10-14      | 10       | 5        | 0.5       | 1823000    | 484          | 0.000266  | 0.001327  | 0.998673  | 96659     | 128       | 482972    | 6352239   | 65.72     |
| 15-19      | 15       | 5        | 0.5       | 2013000    | 1497         | 0.000744  | 0.003711  | 0.996289  | 96530     | 358       | 481756    | 5869267   | 60.80     |
| 20-24      | 20       | 5        | 0.5       | 2172000    | 1709         | 0.000787  | 0.003926  | 0.996074  | 96172     | 378       | 479917    | 5387511   | 56.02     |
| 25-29      | 25       | 5        | 0.5       | 2246000    | 3341         | 0.001488  | 0.00741   | 0.99259   | 95795     | 710       | 477198    | 4907594   | 51.23     |
| 30-34      | 30       | 5        | 0.5       | 2294000    | 3162         | 0.001378  | 0.006868  | 0.993132  | 95085     | 653       | 473791    | 4430396   | 46.59     |
| 35-39      | 35       | 5        | 0.5       | 2200000    | 4593         | 0.002088  | 0.010385  | 0.989615  | 94432     | 981       | 469707    | 3956605   | 41.90     |
| 40-44      | 40       | 5        | 0.5       | 2005000    | 6559         | 0.003272  | 0.016225  | 0.983775  | 93451     | 1516      | 463465    | 3486898   | 37.31     |
| 45-49      | 45       | 5        | 0.5       | 1831000    | 8981         | 0.004905  | 0.024228  | 0.975772  | 91935     | 2227      | 454106    | 3023433   | 32.89     |
| 50-54      | 50       | 5        | 0.5       | 1588000    | 11459        | 0.007216  | 0.035439  | 0.964561  | 89707     | 3179      | 440589    | 2569327   | 28.64     |
| 55-59      | 55       | 5        | 0.5       | 1301000    | 13326        | 0.010243  | 0.049935  | 0.950065  | 86528     | 4321      | 421839    | 2128738   | 24.60     |
| 60-64      | 60       | 5        | 0.5       | 1037000    | 14976        | 0.014442  | 0.069692  | 0.930308  | 82207     | 5729      | 396714    | 1706899   | 20.76     |
| 65-69      | 65       | 5        | 0.5       | 864000     | 20051        | 0.023207  | 0.109672  | 0.890328  | 76478     | 8388      | 361422    | 1310185   | 17.13     |
| 70-74      | 70       | 5        | 0.5       | 728000     | 31158        | 0.0428    | 0.193315  | 0.806685  | 68091     | 13163     | 307546    | 948762.4  | 13.93     |
| 75-79      | 75       | 5        | 0.5       | 492000     | 31144        | 0.0633    | 0.273257  | 0.726743  | 54928     | 15009     | 237115    | 641216.3  | 11.67     |
| 80-85      | 80       | 5        | 0.5       | 131920     | 10897        | 0.0826    | 0.342312  | 0.657688  | 39918     | 13665     | 165430    | 404101.2  | 10.12     |
| 85+        | 85       | 0        | 0.5       | 79152      | 8707         | 0.11      | 1         | 0         | 26254     | 26254     | 238671    | 238670.8  | 9.09      |
| All ages   |          |          |           | 26197072   | 183523       |           |           |           |           |           |           |           |           |

## ARUNACHAL PRADESH

## Estimated abridged life table for 2019

## MALES

| Age      | <i>x</i> | <i>n</i> | <i>ax</i> | <i>pop</i> | <i>death</i> | <i>Mx</i> | <i>qx</i> | <i>px</i> | <i>lx</i> | <i>dx</i> | <i>Lx</i> | <i>Tx</i> | <i>ex</i> |
|----------|----------|----------|-----------|------------|--------------|-----------|-----------|-----------|-----------|-----------|-----------|-----------|-----------|
| <1       | 0        | 1        | 0.1       | 13955      | 245          | 0.017585  | 0.017311  | 0.982689  | 100000    | 1731      | 98442     | 6439329   | 64.39     |
| 1-4      | 1        | 4        | 0.5       | 55287      | 450          | 0.008138  | 0.032029  | 0.967971  | 98269     | 3147      | 386781    | 6340887   | 64.53     |
| 5-9      | 5        | 5        | 0.5       | 70798      | 21           | 0.0003    | 0.001496  | 0.998504  | 95121     | 142       | 475251    | 5954106   | 62.59     |
| 10-14    | 10       | 5        | 0.5       | 77800      | 26           | 0.000333  | 0.001664  | 0.998336  | 94979     | 158       | 474500    | 5478854   | 57.68     |
| 15-19    | 15       | 5        | 0.5       | 76244      | 72           | 0.000948  | 0.004727  | 0.995273  | 94821     | 448       | 472985    | 5004354   | 52.78     |
| 20-24    | 20       | 5        | 0.5       | 78578      | 88           | 0.001124  | 0.005603  | 0.994397  | 94373     | 529       | 470542    | 4531369   | 48.02     |
| 25-29    | 25       | 5        | 0.5       | 73910      | 163          | 0.0022    | 0.010937  | 0.989063  | 93844     | 1026      | 466654    | 4060827   | 43.27     |
| 30-34    | 30       | 5        | 0.5       | 67686      | 199          | 0.002935  | 0.01457   | 0.98543   | 92818     | 1352      | 460707    | 3594173   | 38.72     |
| 35-39    | 35       | 5        | 0.5       | 57572      | 269          | 0.004679  | 0.023124  | 0.976876  | 91465     | 2115      | 452039    | 3133466   | 34.26     |
| 40-44    | 40       | 5        | 0.5       | 51348      | 329          | 0.006412  | 0.031553  | 0.968447  | 89350     | 2819      | 439703    | 2681427   | 30.01     |
| 45-49    | 45       | 5        | 0.5       | 42790      | 472          | 0.01103   | 0.053672  | 0.946328  | 86531     | 4644      | 421044    | 2241725   | 25.91     |
| 50-54    | 50       | 5        | 0.5       | 33454      | 577          | 0.017244  | 0.082656  | 0.917344  | 81887     | 6768      | 392512    | 1820681   | 22.23     |
| 55-59    | 55       | 5        | 0.5       | 25674      | 461          | 0.017956  | 0.085922  | 0.914078  | 75118     | 6454      | 359455    | 1428168   | 19.01     |
| 60-64    | 60       | 5        | 0.5       | 19450      | 563          | 0.028969  | 0.135061  | 0.864939  | 68664     | 9274      | 320135    | 1068713   | 15.56     |
| 65-69    | 65       | 5        | 0.5       | 14004      | 414          | 0.029535  | 0.137522  | 0.862478  | 59390     | 8167      | 276532    | 748577.9  | 12.60     |
| 70-74    | 70       | 5        | 0.5       | 9336       | 648          | 0.069428  | 0.2958    | 0.7042    | 51223     | 15152     | 218234    | 472046    | 9.22      |
| 75-79    | 75       | 5        | 0.5       | 5446       | 577          | 0.105941  | 0.418789  | 0.581211  | 36071     | 15106     | 142590    | 253811.9  | 7.04      |
| 80-85    | 80       | 5        | 0.5       | 3112       | 506          | 0.162542  | 0.577884  | 0.422116  | 20965     | 12115     | 74536     | 111222.2  | 5.31      |
| 85+      | 85       | 0        | 0.5       | 1556       | 375          | 0.241225  | 1         | 0         | 8850      | 8850      | 36686     | 36686.07  | 4.15      |
| All ages |          |          |           | 778000     | 6456         |           |           |           |           |           |           |           |           |

## ARUNACHAL PRADESH

## Estimated abridged life table for 2019

## FEMALES

| Age      | <i>x</i> | <i>n</i> | <i>ax</i> | <i>pop</i> | <i>death</i> | <i>Mx</i> | <i>qx</i> | <i>px</i> | <i>lx</i> | <i>dx</i> | <i>Lx</i> | <i>Tx</i> | <i>ex</i> |
|----------|----------|----------|-----------|------------|--------------|-----------|-----------|-----------|-----------|-----------|-----------|-----------|-----------|
| <1       | 0        | 1        | 0.1       | 12708      | 209          | 0.016454  | 0.016214  | 0.983786  | 100000    | 1621      | 98541     | 6872654   | 68.73     |
| 1-4      | 1        | 4        | 0.5       | 50330      | 523          | 0.010386  | 0.0407    | 0.9593    | 98379     | 4004      | 385506    | 6774113   | 68.86     |
| 5-9      | 5        | 5        | 0.5       | 65237      | 14           | 0.000217  | 0.001083  | 0.998917  | 94375     | 102       | 471617    | 6388607   | 67.69     |
| 10-14    | 10       | 5        | 0.5       | 71101      | 17           | 0.000243  | 0.001215  | 0.998785  | 94272     | 115       | 471075    | 5916989   | 62.76     |
| 15-19    | 15       | 5        | 0.5       | 74033      | 50           | 0.000677  | 0.003381  | 0.996619  | 94158     | 318       | 469993    | 5445914   | 57.84     |
| 20-24    | 20       | 5        | 0.5       | 84295      | 61           | 0.000727  | 0.003629  | 0.996371  | 93839     | 341       | 468346    | 4975921   | 53.03     |
| 25-29    | 25       | 5        | 0.5       | 76232      | 89           | 0.001164  | 0.005802  | 0.994198  | 93499     | 542       | 466139    | 4507575   | 48.21     |
| 30-34    | 30       | 5        | 0.5       | 66703      | 108          | 0.001626  | 0.008095  | 0.991905  | 92956     | 752       | 462901    | 4041437   | 43.48     |
| 35-39    | 35       | 5        | 0.5       | 54242      | 168          | 0.003105  | 0.015406  | 0.984594  | 92204     | 1421      | 457469    | 3578535   | 38.81     |
| 40-44    | 40       | 5        | 0.5       | 44713      | 206          | 0.004604  | 0.022758  | 0.977242  | 90784     | 2066      | 448752    | 3121067   | 34.38     |
| 45-49    | 45       | 5        | 0.5       | 35917      | 228          | 0.006336  | 0.031186  | 0.968814  | 88717     | 2767      | 436670    | 2672314   | 30.12     |
| 50-54    | 50       | 5        | 0.5       | 27121      | 278          | 0.010256  | 0.049996  | 0.950004  | 85951     | 4297      | 419011    | 2235644   | 26.01     |
| 55-59    | 55       | 5        | 0.5       | 25655      | 239          | 0.009321  | 0.045546  | 0.954454  | 81653     | 3719      | 398970    | 1816633   | 22.25     |
| 60-64    | 60       | 5        | 0.5       | 16859      | 292          | 0.017337  | 0.083084  | 0.916916  | 77935     | 6475      | 373485    | 1417663   | 18.19     |
| 65-69    | 65       | 5        | 0.5       | 11728      | 194          | 0.016566  | 0.079536  | 0.920464  | 71459     | 5684      | 343088    | 1044178   | 14.61     |
| 70-74    | 70       | 5        | 0.5       | 7330       | 370          | 0.050486  | 0.22414   | 0.77586   | 65776     | 14743     | 292021    | 701090.6  | 10.66     |
| 75-79    | 75       | 5        | 0.5       | 5131       | 434          | 0.084567  | 0.349042  | 0.650958  | 51033     | 17813     | 210632    | 409069.2  | 8.02      |
| 80-85    | 80       | 5        | 0.5       | 2199       | 304          | 0.138128  | 0.513366  | 0.486634  | 33220     | 17054     | 123466    | 198436.7  | 5.97      |
| 85+      | 85       | 0        | 0.5       | 1466       | 316          | 0.215631  | 1         | 0         | 16166     | 16166     | 74971     | 74970.98  | 4.64      |
| All ages |          |          |           | 733000     | 4101         |           |           |           |           |           |           |           |           |

**ASSAM**

Estimated abridged life table for 2019

**MALES**

| <i>Age</i> | <i>x</i> | <i>n</i> | <i>ax</i> | <i>pop</i> | <i>death</i> | <i>Mx</i> | <i>qx</i> | <i>px</i> | <i>lx</i> | <i>dx</i> | <i>Lx</i> | <i>Tx</i> | <i>ex</i> |
|------------|----------|----------|-----------|------------|--------------|-----------|-----------|-----------|-----------|-----------|-----------|-----------|-----------|
| <1         | 0        | 1        | 0.1       | 323000     | 9151         | 0.028332  | 0.027627  | 0.972373  | 100000    | 2763      | 97514     | 6778437   | 67.78     |
| 1-4        | 1        | 4        | 0.5       | 1252000    | 5324         | 0.004253  | 0.016867  | 0.983133  | 97237     | 1640      | 385669    | 6680923   | 68.71     |
| 5-9        | 5        | 5        | 0.5       | 1570000    | 995          | 0.000634  | 0.003165  | 0.996835  | 95597     | 303       | 477230    | 6295254   | 65.85     |
| 10-14      | 10       | 5        | 0.5       | 1687000    | 729          | 0.000432  | 0.002159  | 0.997841  | 95295     | 206       | 475959    | 5818025   | 61.05     |
| 15-19      | 15       | 5        | 0.5       | 1730000    | 930          | 0.000538  | 0.002685  | 0.997315  | 95089     | 255       | 474806    | 5342066   | 56.18     |
| 20-24      | 20       | 5        | 0.5       | 1701000    | 1288         | 0.000757  | 0.00378   | 0.99622   | 94834     | 358       | 473272    | 4867259   | 51.32     |
| 25-29      | 25       | 5        | 0.5       | 1549000    | 1466         | 0.000947  | 0.004721  | 0.995279  | 94475     | 446       | 471261    | 4393987   | 46.51     |
| 30-34      | 30       | 5        | 0.5       | 1407000    | 1276         | 0.000907  | 0.004525  | 0.995475  | 94029     | 425       | 469082    | 3922726   | 41.72     |
| 35-39      | 35       | 5        | 0.5       | 1299000    | 1484         | 0.001143  | 0.005697  | 0.994303  | 93604     | 533       | 466685    | 3453644   | 36.90     |
| 40-44      | 40       | 5        | 0.5       | 1176000    | 2055         | 0.001748  | 0.008701  | 0.991299  | 93070     | 810       | 463328    | 2986959   | 32.09     |
| 45-49      | 45       | 5        | 0.5       | 1049000    | 6284         | 0.005991  | 0.029512  | 0.970488  | 92261     | 2723      | 454496    | 2523631   | 27.35     |
| 50-54      | 50       | 5        | 0.5       | 908000     | 6816         | 0.007507  | 0.036844  | 0.963156  | 89538     | 3299      | 439442    | 2069135   | 23.11     |
| 55-59      | 55       | 5        | 0.5       | 738000     | 11463        | 0.015533  | 0.074761  | 0.925239  | 86239     | 6447      | 415076    | 1629693   | 18.90     |
| 60-64      | 60       | 5        | 0.5       | 547000     | 11073        | 0.020243  | 0.096339  | 0.903661  | 79792     | 7687      | 379740    | 1214617   | 15.22     |
| 65-69      | 65       | 5        | 0.5       | 383000     | 26821        | 0.07003   | 0.297979  | 0.702021  | 72105     | 21486     | 306808    | 834876.9  | 11.58     |
| 70-74      | 70       | 5        | 0.5       | 256000     | 14848        | 0.058     | 0.253275  | 0.746725  | 50619     | 12820     | 221043    | 528068.4  | 10.43     |
| 75-79      | 75       | 5        | 0.5       | 150000     | 11595        | 0.0773    | 0.323905  | 0.676095  | 37798     | 12243     | 158384    | 307025.4  | 8.12      |
| 80-85      | 80       | 5        | 0.5       | 71372      | 10906        | 0.1528    | 0.552822  | 0.447178  | 25555     | 14128     | 92458     | 148641.2  | 5.82      |
| 85+        | 85       | 0        | 0.5       | 35686      | 7259         | 0.2034    | 1         | 0         | 11428     | 11428     | 56184     | 56183.66  | 4.92      |
| All ages   |          |          |           | 17832058   | 131766       |           |           |           |           |           |           |           |           |

**ASSAM**

Estimated abridged life table for 2019

**FEMALES**

| <i>Age</i> | <i>x</i> | <i>n</i> | <i>ax</i> | <i>pop</i> | <i>death</i> | <i>Mx</i> | <i>qx</i> | <i>px</i> | <i>lx</i> | <i>dx</i> | <i>Lx</i> | <i>Tx</i> | <i>ex</i> |
|------------|----------|----------|-----------|------------|--------------|-----------|-----------|-----------|-----------|-----------|-----------|-----------|-----------|
| <1         | 0        | 1        | 0.1       | 298000     | 10443        | 0.035042  | 0.033971  | 0.966029  | 100000    | 3397      | 96943     | 6737855   | 67.38     |
| 1-4        | 1        | 4        | 0.5       | 1151000    | 5134         | 0.004461  | 0.017685  | 0.982315  | 96603     | 1708      | 382995    | 6640912   | 68.74     |
| 5-9        | 5        | 5        | 0.5       | 1430000    | 429          | 0.0003    | 0.001499  | 0.998501  | 94895     | 142       | 474117    | 6257917   | 65.95     |
| 10-14      | 10       | 5        | 0.5       | 1637000    | 285          | 0.000174  | 0.000869  | 0.999131  | 94752     | 82        | 473556    | 5783800   | 61.04     |
| 15-19      | 15       | 5        | 0.5       | 1660000    | 3320         | 0.002     | 0.00995   | 0.99005   | 94670     | 942       | 470995    | 5310245   | 56.09     |
| 20-24      | 20       | 5        | 0.5       | 1606000    | 1606         | 0.001     | 0.004988  | 0.995012  | 93728     | 467       | 467471    | 4839250   | 51.63     |
| 25-29      | 25       | 5        | 0.5       | 1491000    | 2982         | 0.002     | 0.00995   | 0.99005   | 93260     | 928       | 463982    | 4371779   | 46.88     |
| 30-34      | 30       | 5        | 0.5       | 1440000    | 1872         | 0.0013    | 0.006479  | 0.993521  | 92332     | 598       | 460167    | 3907797   | 42.32     |
| 35-39      | 35       | 5        | 0.5       | 1344000    | 4570         | 0.0034    | 0.016857  | 0.983143  | 91734     | 1546      | 454806    | 3447630   | 37.58     |
| 40-44      | 40       | 5        | 0.5       | 1179000    | 3301         | 0.0028    | 0.013903  | 0.986097  | 90188     | 1254      | 447805    | 2992824   | 33.18     |
| 45-49      | 45       | 5        | 0.5       | 1019000    | 6216         | 0.0061    | 0.030042  | 0.969958  | 88934     | 2672      | 437991    | 2545019   | 28.62     |
| 50-54      | 50       | 5        | 0.5       | 842000     | 7662         | 0.0091    | 0.044488  | 0.955512  | 86262     | 3838      | 421718    | 2107028   | 24.43     |
| 55-59      | 55       | 5        | 0.5       | 668000     | 8884         | 0.0133    | 0.06436   | 0.93564   | 82425     | 5305      | 398861    | 1685311   | 20.45     |
| 60-64      | 60       | 5        | 0.5       | 504000     | 8518         | 0.0169    | 0.081075  | 0.918925  | 77120     | 6252      | 369968    | 1286449   | 16.68     |
| 65-69      | 65       | 5        | 0.5       | 362000     | 25321        | 0.069947  | 0.297679  | 0.702321  | 70867     | 21096     | 301598    | 916481    | 12.93     |
| 70-74      | 70       | 5        | 0.5       | 258000     | 10913        | 0.0423    | 0.191273  | 0.808727  | 49772     | 9520      | 225058    | 614883.4  | 12.35     |
| 75-79      | 75       | 5        | 0.5       | 170000     | 8976         | 0.0528    | 0.233216  | 0.766784  | 40252     | 9387      | 177790    | 389824.9  | 9.68      |
| 80-85      | 80       | 5        | 0.5       | 51600      | 6899         | 0.1337    | 0.501031  | 0.498969  | 30864     | 15464     | 115662    | 212034.8  | 6.87      |
| 85+        | 85       | 0        | 0.5       | 34400      | 5497         | 0.1598    | 1         | 0         | 15400     | 15400     | 96373     | 96372.85  | 6.26      |
| All ages   |          |          |           | 17145000   | 122827       |           |           |           |           |           |           |           |           |

**BIHAR**

Estimated abridged life table for 2019

**MALES**

| <i>Age</i> | <i>x</i> | <i>n</i> | <i>ax</i> | <i>pop</i> | <i>death</i> | <i>Mx</i> | <i>qx</i> | <i>px</i> | <i>lx</i> | <i>dx</i> | <i>Lx</i> | <i>Tx</i> | <i>ex</i> |
|------------|----------|----------|-----------|------------|--------------|-----------|-----------|-----------|-----------|-----------|-----------|-----------|-----------|
| <1         | 0        | 1        | 0.1       | 1445000    | 47526        | 0.03289   | 0.031945  | 0.968055  | 100000    | 3194      | 97125     | 6702404   | 67.02     |
| 1-4        | 1        | 4        | 0.5       | 5653000    | 34408        | 0.006087  | 0.024054  | 0.975946  | 96806     | 2329      | 382565    | 6605279   | 68.23     |
| 5-9        | 5        | 5        | 0.5       | 7259000    | 3537         | 0.000487  | 0.002434  | 0.997566  | 94477     | 230       | 471810    | 6222714   | 65.86     |
| 10-14      | 10       | 5        | 0.5       | 7148000    | 3025         | 0.000423  | 0.002114  | 0.997886  | 94247     | 199       | 470737    | 5750904   | 61.02     |
| 15-19      | 15       | 5        | 0.5       | 7111000    | 5298         | 0.000745  | 0.003719  | 0.996281  | 94048     | 350       | 469365    | 5280166   | 56.14     |
| 20-24      | 20       | 5        | 0.5       | 6552000    | 9124         | 0.001392  | 0.006938  | 0.993062  | 93698     | 650       | 466865    | 4810802   | 51.34     |
| 25-29      | 25       | 5        | 0.5       | 5148000    | 10130        | 0.001968  | 0.009791  | 0.990209  | 93048     | 911       | 462962    | 4343937   | 46.68     |
| 30-34      | 30       | 5        | 0.5       | 4093000    | 11709        | 0.002861  | 0.014202  | 0.985798  | 92137     | 1308      | 457413    | 3880974   | 42.12     |
| 35-39      | 35       | 5        | 0.5       | 3611000    | 11512        | 0.003188  | 0.015815  | 0.984185  | 90828     | 1436      | 450551    | 3423561   | 37.69     |
| 40-44      | 40       | 5        | 0.5       | 3355000    | 14366        | 0.004282  | 0.021183  | 0.978817  | 89392     | 1894      | 442226    | 2973010   | 33.26     |
| 45-49      | 45       | 5        | 0.5       | 3060000    | 23101        | 0.007549  | 0.037047  | 0.962953  | 87498     | 3242      | 429388    | 2530784   | 28.92     |
| 50-54      | 50       | 5        | 0.5       | 2606000    | 23409        | 0.008983  | 0.043927  | 0.956073  | 84257     | 3701      | 412031    | 2101396   | 24.94     |
| 55-59      | 55       | 5        | 0.5       | 2073000    | 29167        | 0.01407   | 0.067959  | 0.932041  | 80556     | 5474      | 389092    | 1689364   | 20.97     |
| 60-64      | 60       | 5        | 0.5       | 1569000    | 33762        | 0.021518  | 0.102097  | 0.897903  | 75081     | 7666      | 356242    | 1300272   | 17.32     |
| 65-69      | 65       | 5        | 0.5       | 1222000    | 55715        | 0.045593  | 0.204641  | 0.795359  | 67416     | 13796     | 302588    | 944029.3  | 14.00     |
| 70-74      | 70       | 5        | 0.5       | 1006000    | 46980        | 0.0467    | 0.209089  | 0.790911  | 53620     | 11211     | 240070    | 641441    | 11.96     |
| 75-79      | 75       | 5        | 0.5       | 710000     | 54670        | 0.077     | 0.322851  | 0.677149  | 42408     | 13692     | 177813    | 401370.9  | 9.46      |
| 80-85      | 80       | 5        | 0.5       | 192036     | 21950        | 0.1143    | 0.444488  | 0.555512  | 28717     | 12764     | 111673    | 223558    | 7.78      |
| 85+        | 85       | 0        | 0.5       | 192036     | 27380        | 0.14258   | 1         | 0         | 15953     | 15953     | 111885    | 111884.8  | 7.01      |
| All ages   |          |          |           | 64005072   | 466770       |           |           |           |           |           |           |           |           |

**BIHAR**

Estimated abridged life table for 2019

**FEMALES**

| Age      | <i>x</i> | <i>n</i> | <i>ax</i> | <i>pop</i> | <i>death</i> | <i>Mx</i> | <i>qx</i> | <i>px</i> | <i>lx</i> | <i>dx</i> | <i>Lx</i> | <i>Tx</i> | <i>ex</i> |
|----------|----------|----------|-----------|------------|--------------|-----------|-----------|-----------|-----------|-----------|-----------|-----------|-----------|
| <1       | 0        | 1        | 0.1       | 1307000    | 45374        | 0.034716  | 0.033664  | 0.966336  | 100000    | 3366      | 96970     | 6829627   | 68.30     |
| 1-4      | 1        | 4        | 0.5       | 5088000    | 28922        | 0.005684  | 0.022482  | 0.977518  | 96634     | 2172      | 382189    | 6732657   | 69.67     |
| 5-9      | 5        | 5        | 0.5       | 6519000    | 3911         | 0.0006    | 0.002996  | 0.997004  | 94461     | 283       | 471598    | 6350468   | 67.23     |
| 10-14    | 10       | 5        | 0.5       | 6870000    | 6183         | 0.0009    | 0.00449   | 0.99551   | 94178     | 423       | 469834    | 5878870   | 62.42     |
| 15-19    | 15       | 5        | 0.5       | 6601000    | 4621         | 0.0007    | 0.003494  | 0.996506  | 93755     | 328       | 467958    | 5409036   | 57.69     |
| 20-24    | 20       | 5        | 0.5       | 5708000    | 7420         | 0.0013    | 0.006479  | 0.993521  | 93428     | 605       | 465625    | 4941079   | 52.89     |
| 25-29    | 25       | 5        | 0.5       | 4325000    | 5311         | 0.001228  | 0.006121  | 0.993879  | 92822     | 568       | 462692    | 4475453   | 48.22     |
| 30-34    | 30       | 5        | 0.5       | 3766000    | 7717         | 0.002049  | 0.010193  | 0.989807  | 92254     | 940       | 458920    | 4012762   | 43.50     |
| 35-39    | 35       | 5        | 0.5       | 3655000    | 12063        | 0.0033    | 0.016367  | 0.983633  | 91314     | 1494      | 452833    | 3553841   | 38.92     |
| 40-44    | 40       | 5        | 0.5       | 3423000    | 12012        | 0.003509  | 0.017393  | 0.982607  | 89819     | 1562      | 445191    | 3101008   | 34.52     |
| 45-49    | 45       | 5        | 0.5       | 2969000    | 11816        | 0.00398   | 0.019703  | 0.980297  | 88257     | 1739      | 436939    | 2655817   | 30.09     |
| 50-54    | 50       | 5        | 0.5       | 2401000    | 20609        | 0.008584  | 0.042017  | 0.957983  | 86518     | 3635      | 423503    | 2218878   | 25.65     |
| 55-59    | 55       | 5        | 0.5       | 1875000    | 24000        | 0.0128    | 0.062016  | 0.937984  | 82883     | 5140      | 401565    | 1795375   | 21.66     |
| 60-64    | 60       | 5        | 0.5       | 1462000    | 36550        | 0.025     | 0.117647  | 0.882353  | 77743     | 9146      | 365850    | 1393809   | 17.93     |
| 65-69    | 65       | 5        | 0.5       | 1235000    | 39520        | 0.032     | 0.148148  | 0.851852  | 68597     | 10162     | 317578    | 1027960   | 14.99     |
| 70-74    | 70       | 5        | 0.5       | 999000     | 42208        | 0.042251  | 0.191071  | 0.808929  | 58434     | 11165     | 264259    | 710382.2  | 12.16     |
| 75-79    | 75       | 5        | 0.5       | 548000     | 23957        | 0.043716  | 0.197046  | 0.802954  | 47269     | 9314      | 213060    | 446123.4  | 9.44      |
| 80-85    | 80       | 5        | 0.5       | 177213     | 30557        | 0.172434  | 0.602458  | 0.397542  | 37955     | 22866     | 132609    | 233062.9  | 6.14      |
| 85+      | 85       | 0        | 0.5       | 177213     | 26618        | 0.150206  | 1         | 0         | 15089     | 15089     | 100454    | 100453.7  | 6.66      |
| All ages |          |          |           | 59105426   | 389369       |           |           |           |           |           |           |           |           |



**CHHATTISGARH**

Estimated abridged life table for 2019

**MALES**

| <i>Age</i> | <i>x</i> | <i>n</i> | <i>ax</i> | <i>pop</i> | <i>death</i> | <i>Mx</i> | <i>qx</i> | <i>px</i> | <i>lx</i> | <i>dx</i> | <i>Lx</i> | <i>Tx</i> | <i>ex</i> |
|------------|----------|----------|-----------|------------|--------------|-----------|-----------|-----------|-----------|-----------|-----------|-----------|-----------|
| <1         | 0        | 1        | 0.1       | 289000     | 11451        | 0.039623  | 0.038258  | 0.961742  | 100000    | 3826      | 96557     | 6306291   | 63.06     |
| 1-4        | 1        | 4        | 0.5       | 1417000    | 2898         | 0.002045  | 0.008148  | 0.991852  | 96174     | 784       | 383129    | 6209735   | 64.57     |
| 5-9        | 5        | 5        | 0.5       | 1444000    | 678          | 0.000469  | 0.002344  | 0.997656  | 95391     | 224       | 476394    | 5826605   | 61.08     |
| 10-14      | 10       | 5        | 0.5       | 1342000    | 1037         | 0.000773  | 0.003858  | 0.996142  | 95167     | 367       | 474917    | 5350211   | 56.22     |
| 15-19      | 15       | 5        | 0.5       | 1390000    | 2476         | 0.001781  | 0.008865  | 0.991135  | 94800     | 840       | 471898    | 4875294   | 51.43     |
| 20-24      | 20       | 5        | 0.5       | 1412000    | 2430         | 0.001721  | 0.008568  | 0.991432  | 93959     | 805       | 467785    | 4403396   | 46.86     |
| 25-29      | 25       | 5        | 0.5       | 1318000    | 3997         | 0.003033  | 0.015049  | 0.984951  | 93154     | 1402      | 462267    | 3935611   | 42.25     |
| 30-34      | 30       | 5        | 0.5       | 1175000    | 4081         | 0.003473  | 0.017216  | 0.982784  | 91753     | 1580      | 454813    | 3473344   | 37.86     |
| 35-39      | 35       | 5        | 0.5       | 1026000    | 5236         | 0.005103  | 0.025195  | 0.974805  | 90173     | 2272      | 445185    | 3018531   | 33.47     |
| 40-44      | 40       | 5        | 0.5       | 906000     | 4995         | 0.005514  | 0.027194  | 0.972806  | 87901     | 2390      | 433529    | 2573346   | 29.28     |
| 45-49      | 45       | 5        | 0.5       | 832000     | 10505        | 0.012626  | 0.0612    | 0.9388    | 85511     | 5233      | 414470    | 2139817   | 25.02     |
| 50-54      | 50       | 5        | 0.5       | 746000     | 10199        | 0.013672  | 0.066098  | 0.933902  | 80277     | 5306      | 388121    | 1725348   | 21.49     |
| 55-59      | 55       | 5        | 0.5       | 609000     | 14372        | 0.0236    | 0.111426  | 0.888574  | 74971     | 8354      | 353971    | 1337227   | 17.84     |
| 60-64      | 60       | 5        | 0.5       | 443000     | 12183        | 0.0275    | 0.128655  | 0.871345  | 66617     | 8571      | 311660    | 983255.5  | 14.76     |
| 65-69      | 65       | 5        | 0.5       | 308000     | 14476        | 0.047     | 0.210291  | 0.789709  | 58047     | 12207     | 259717    | 671595.2  | 11.57     |
| 70-74      | 70       | 5        | 0.5       | 208000     | 15072        | 0.072463  | 0.306746  | 0.693254  | 45840     | 14061     | 194047    | 411878.3  | 8.99      |
| 75-79      | 75       | 5        | 0.5       | 125000     | 10611        | 0.084891  | 0.350144  | 0.649856  | 31779     | 11127     | 131076    | 217831.2  | 6.85      |
| 80-85      | 80       | 5        | 0.5       | 29588      | 6505         | 0.219864  | 0.709394  | 0.290606  | 20652     | 14650     | 66633     | 86755.22  | 4.20      |
| 85+        | 85       | 0        | 0.5       | 14794      | 4412         | 0.298249  | 1         | 0         | 6001      | 6001      | 20122     | 20122.44  | 3.35      |
| All ages   |          |          |           | 15034382   | 137616       |           |           |           |           |           |           |           |           |

**CHHATTISGARH**

Estimated abridged life table for 2019

**FEMALES**

| Age      | <i>x</i> | <i>n</i> | <i>ax</i> | <i>pop</i> | <i>death</i> | <i>Mx</i> | <i>qx</i> | <i>px</i> | <i>lx</i> | <i>dx</i> | <i>Lx</i> | <i>Tx</i> | <i>ex</i> |
|----------|----------|----------|-----------|------------|--------------|-----------|-----------|-----------|-----------|-----------|-----------|-----------|-----------|
| <1       | 0        | 1        | 0.1       | 274000     | 10448        | 0.038132  | 0.036867  | 0.963133  | 100000    | 3687      | 96682     | 6828028   | 68.28     |
| 1-4      | 1        | 4        | 0.5       | 1339000    | 2842         | 0.002123  | 0.008454  | 0.991546  | 96313     | 814       | 383625    | 6731346   | 69.89     |
| 5-9      | 5        | 5        | 0.5       | 1367000    | 804          | 0.000588  | 0.002936  | 0.997064  | 95499     | 280       | 476794    | 6347721   | 66.47     |
| 10-14    | 10       | 5        | 0.5       | 1299000    | 821          | 0.000632  | 0.003156  | 0.996844  | 95219     | 301       | 475342    | 5870927   | 61.66     |
| 15-19    | 15       | 5        | 0.5       | 1349000    | 579          | 0.000429  | 0.002143  | 0.997857  | 94918     | 203       | 474082    | 5395585   | 56.84     |
| 20-24    | 20       | 5        | 0.5       | 1384000    | 3412         | 0.002465  | 0.012251  | 0.987749  | 94715     | 1160      | 470673    | 4921503   | 51.96     |
| 25-29    | 25       | 5        | 0.5       | 1298000    | 2737         | 0.002108  | 0.010486  | 0.989514  | 93554     | 981       | 465320    | 4450830   | 47.57     |
| 30-34    | 30       | 5        | 0.5       | 1152000    | 2097         | 0.00182   | 0.009061  | 0.990939  | 92573     | 839       | 460770    | 3985510   | 43.05     |
| 35-39    | 35       | 5        | 0.5       | 1010000    | 2494         | 0.002469  | 0.012271  | 0.987729  | 91735     | 1126      | 455859    | 3524740   | 38.42     |
| 40-44    | 40       | 5        | 0.5       | 909000     | 3765         | 0.004142  | 0.020495  | 0.979505  | 90609     | 1857      | 448402    | 3068881   | 33.87     |
| 45-49    | 45       | 5        | 0.5       | 841000     | 3717         | 0.00442   | 0.021857  | 0.978143  | 88752     | 1940      | 438910    | 2620479   | 29.53     |
| 50-54    | 50       | 5        | 0.5       | 741000     | 6948         | 0.009376  | 0.045806  | 0.954194  | 86812     | 3977      | 424119    | 2181569   | 25.13     |
| 55-59    | 55       | 5        | 0.5       | 600000     | 9195         | 0.015325  | 0.073797  | 0.926203  | 82836     | 6113      | 398895    | 1757450   | 21.22     |
| 60-64    | 60       | 5        | 0.5       | 457000     | 8833         | 0.019329  | 0.09219   | 0.90781   | 76722     | 7073      | 365930    | 1358555   | 17.71     |
| 65-69    | 65       | 5        | 0.5       | 355000     | 11072        | 0.031189  | 0.144665  | 0.855335  | 69649     | 10076     | 323058    | 992625.3  | 14.25     |
| 70-74    | 70       | 5        | 0.5       | 281000     | 13533        | 0.048159  | 0.214918  | 0.785082  | 59574     | 12803     | 265860    | 669567.6  | 11.24     |
| 75-79    | 75       | 5        | 0.5       | 182000     | 9046         | 0.049706  | 0.221059  | 0.778941  | 46770     | 10339     | 208004    | 403708    | 8.63      |
| 80-85    | 80       | 5        | 0.5       | 44094      | 7465         | 0.169305  | 0.594779  | 0.405221  | 36431     | 21669     | 127985    | 195704.4  | 5.37      |
| 85+      | 85       | 0        | 0.5       | 29396      | 6408         | 0.217998  | 1         | 0         | 14763     | 14763     | 67720     | 67719.51  | 4.59      |
| All ages |          |          |           | 14911490   | 106216       |           |           |           |           |           |           |           |           |

## GOA

Estimated abridged life table for 2019

## MALES

| Age      | <i>x</i> | <i>n</i> | <i>ax</i> | <i>pop</i> | <i>death</i> | <i>Mx</i> | <i>qx</i> | <i>px</i> | <i>lx</i> | <i>dx</i> | <i>Lx</i> | <i>Tx</i> | <i>ex</i> |
|----------|----------|----------|-----------|------------|--------------|-----------|-----------|-----------|-----------|-----------|-----------|-----------|-----------|
| <1       | 0        | 1        | 0.1       | 12419      | 122          | 0.009849  | 0.009762  | 0.990238  | 100000    | 976       | 99121     | 6464419   | 64.64     |
| 1-4      | 1        | 4        | 0.5       | 49201      | 18           | 0.000367  | 0.001466  | 0.998534  | 99024     | 145       | 395805    | 6365298   | 64.28     |
| 5-9      | 5        | 5        | 0.5       | 62400      | 14           | 0.000224  | 0.00112   | 0.99888   | 98879     | 111       | 494116    | 5969493   | 60.37     |
| 10-14    | 10       | 5        | 0.5       | 68640      | 17           | 0.000249  | 0.001244  | 0.998756  | 98768     | 123       | 493532    | 5475377   | 55.44     |
| 15-19    | 15       | 5        | 0.5       | 75660      | 101          | 0.001336  | 0.006656  | 0.993344  | 98645     | 657       | 491583    | 4981845   | 50.50     |
| 20-24    | 20       | 5        | 0.5       | 78780      | 124          | 0.001568  | 0.007809  | 0.992191  | 97988     | 765       | 488029    | 4490262   | 45.82     |
| 25-29    | 25       | 5        | 0.5       | 77220      | 189          | 0.002454  | 0.012194  | 0.987806  | 97223     | 1186      | 483152    | 4002233   | 41.17     |
| 30-34    | 30       | 5        | 0.5       | 68640      | 232          | 0.003374  | 0.016729  | 0.983271  | 96038     | 1607      | 476171    | 3519081   | 36.64     |
| 35-39    | 35       | 5        | 0.5       | 60840      | 333          | 0.005465  | 0.026958  | 0.973042  | 94431     | 2546      | 465791    | 3042910   | 32.22     |
| 40-44    | 40       | 5        | 0.5       | 52260      | 406          | 0.007776  | 0.03814   | 0.96186   | 91885     | 3505      | 450666    | 2577119   | 28.05     |
| 45-49    | 45       | 5        | 0.5       | 43680      | 508          | 0.01164   | 0.056556  | 0.943444  | 88381     | 4998      | 429408    | 2126453   | 24.06     |
| 50-54    | 50       | 5        | 0.5       | 35880      | 621          | 0.01732   | 0.083006  | 0.916994  | 83382     | 6921      | 399609    | 1697045   | 20.35     |
| 55-59    | 55       | 5        | 0.5       | 27300      | 679          | 0.024855  | 0.117004  | 0.882996  | 76461     | 8946      | 359940    | 1297436   | 16.97     |
| 60-64    | 60       | 5        | 0.5       | 24180      | 829          | 0.034298  | 0.157946  | 0.842054  | 67515     | 10664     | 310915    | 937495.8  | 13.89     |
| 65-69    | 65       | 5        | 0.5       | 17160      | 894          | 0.052115  | 0.230537  | 0.769463  | 56851     | 13106     | 251490    | 626580.4  | 11.02     |
| 70-74    | 70       | 5        | 0.5       | 11700      | 1061         | 0.090695  | 0.36966   | 0.63034   | 43745     | 16171     | 178298    | 375090.1  | 8.57      |
| 75-79    | 75       | 5        | 0.5       | 7800       | 811          | 0.104033  | 0.412802  | 0.587198  | 27574     | 11383     | 109414    | 196792.6  | 7.14      |
| 80-85    | 80       | 5        | 0.5       | 3900       | 499          | 0.12804   | 0.484964  | 0.515036  | 16191     | 7852      | 61327     | 87378.48  | 5.40      |
| 85+      | 85       | 0        | 0.5       | 2340       | 749          | 0.320101  | 1         | 0         | 8339      | 8339      | 26052     | 26051.77  | 3.12      |
| All ages |          |          |           | 780000     | 8209         |           |           |           |           |           |           |           |           |

## GOA

Estimated abridged life table for 2019

## FEMALES

| Age      | <i>x</i> | <i>n</i> | <i>ax</i> | <i>pop</i> | <i>death</i> | <i>Mx</i> | <i>qx</i> | <i>px</i> | <i>lx</i> | <i>dx</i> | <i>Lx</i> | <i>Tx</i> | <i>ex</i> |
|----------|----------|----------|-----------|------------|--------------|-----------|-----------|-----------|-----------|-----------|-----------|-----------|-----------|
| <1       | 0        | 1        | 0.1       | 11427      | 79           | 0.006932  | 0.006889  | 0.993111  | 100000    | 689       | 99380     | 7185353   | 71.85     |
| 1-4      | 1        | 4        | 0.5       | 45257      | 29           | 0.000642  | 0.002567  | 0.997433  | 99311     | 255       | 396735    | 7085973   | 71.35     |
| 5-9      | 5        | 5        | 0.5       | 57450      | 12           | 0.000212  | 0.00106   | 0.99894   | 99056     | 105       | 495019    | 6689239   | 67.53     |
| 10-14    | 10       | 5        | 0.5       | 64344      | 15           | 0.000231  | 0.001156  | 0.998844  | 98951     | 114       | 494470    | 6194220   | 62.60     |
| 15-19    | 15       | 5        | 0.5       | 71238      | 36           | 0.0005    | 0.002499  | 0.997501  | 98837     | 247       | 493567    | 5699750   | 57.67     |
| 20-24    | 20       | 5        | 0.5       | 78898      | 44           | 0.000552  | 0.002757  | 0.997243  | 98590     | 272       | 492270    | 5206183   | 52.81     |
| 25-29    | 25       | 5        | 0.5       | 78132      | 41           | 0.00052   | 0.002595  | 0.997405  | 98318     | 255       | 490952    | 4713913   | 47.95     |
| 30-34    | 30       | 5        | 0.5       | 68174      | 50           | 0.000728  | 0.003633  | 0.996367  | 98063     | 356       | 489424    | 4222961   | 43.06     |
| 35-39    | 35       | 5        | 0.5       | 58982      | 77           | 0.001308  | 0.006519  | 0.993481  | 97707     | 637       | 486940    | 3733538   | 38.21     |
| 40-44    | 40       | 5        | 0.5       | 50556      | 94           | 0.001865  | 0.009283  | 0.990717  | 97070     | 901       | 483095    | 3246597   | 33.45     |
| 45-49    | 45       | 5        | 0.5       | 43662      | 168          | 0.003844  | 0.019038  | 0.980962  | 96168     | 1831      | 476265    | 2763502   | 28.74     |
| 50-54    | 50       | 5        | 0.5       | 35236      | 205          | 0.005822  | 0.028693  | 0.971307  | 94338     | 2707      | 464921    | 2287237   | 24.25     |
| 55-59    | 55       | 5        | 0.5       | 29874      | 333          | 0.011161  | 0.054292  | 0.945708  | 91631     | 4975      | 445717    | 1822316   | 19.89     |
| 60-64    | 60       | 5        | 0.5       | 25278      | 408          | 0.016122  | 0.077487  | 0.922513  | 86656     | 6715      | 416493    | 1376599   | 15.89     |
| 65-69    | 65       | 5        | 0.5       | 18384      | 599          | 0.03256   | 0.150548  | 0.849452  | 79941     | 12035     | 369619    | 960105.5  | 12.01     |
| 70-74    | 70       | 5        | 0.5       | 14554      | 1174         | 0.080671  | 0.335659  | 0.664341  | 67906     | 22793     | 282548    | 590486.6  | 8.70      |
| 75-79    | 75       | 5        | 0.5       | 7660       | 898          | 0.11721   | 0.453239  | 0.546761  | 45113     | 20447     | 174447    | 307938.5  | 6.83      |
| 80-85    | 80       | 5        | 0.5       | 3830       | 553          | 0.144258  | 0.530109  | 0.469891  | 24666     | 13076     | 90641     | 133491.1  | 5.41      |
| 85+      | 85       | 0        | 0.5       | 3064       | 829          | 0.270484  | 1         | 0         | 11590     | 11590     | 42850     | 42850.29  | 3.70      |
| All ages |          |          |           | 766000     | 5642         |           |           |           |           |           |           |           |           |

**GUJARAT**

Estimated abridged life table for 2019

**MALES**

| <i>Age</i> | <i>x</i> | <i>n</i> | <i>ax</i> | <i>pop</i> | <i>death</i> | <i>Mx</i> | <i>qx</i> | <i>px</i> | <i>lx</i> | <i>dx</i> | <i>Lx</i> | <i>Tx</i> | <i>ex</i> |
|------------|----------|----------|-----------|------------|--------------|-----------|-----------|-----------|-----------|-----------|-----------|-----------|-----------|
| <1         | 0        | 1        | 0.1       | 639000     | 17777        | 0.02782   | 0.02714   | 0.97286   | 100000    | 2714      | 97557     | 6711512   | 67.12     |
| 1-4        | 1        | 4        | 0.5       | 2497000    | 3237         | 0.001296  | 0.005172  | 0.994828  | 97286     | 503       | 388138    | 6613954   | 67.98     |
| 5-9        | 5        | 5        | 0.5       | 3166000    | 909          | 0.000287  | 0.001434  | 0.998566  | 96783     | 139       | 483567    | 6225817   | 64.33     |
| 10-14      | 10       | 5        | 0.5       | 3028000    | 2050         | 0.000677  | 0.003379  | 0.996621  | 96644     | 327       | 482404    | 5742249   | 59.42     |
| 15-19      | 15       | 5        | 0.5       | 3210000    | 3645         | 0.001135  | 0.005661  | 0.994339  | 96317     | 545       | 480224    | 5259846   | 54.61     |
| 20-24      | 20       | 5        | 0.5       | 3365000    | 6260         | 0.00186   | 0.009259  | 0.990741  | 95772     | 887       | 476644    | 4779622   | 49.91     |
| 25-29      | 25       | 5        | 0.5       | 3293000    | 7673         | 0.00233   | 0.011583  | 0.988417  | 94885     | 1099      | 471679    | 4302978   | 45.35     |
| 30-34      | 30       | 5        | 0.5       | 3081000    | 8719         | 0.00283   | 0.014051  | 0.985949  | 93786     | 1318      | 465637    | 3831299   | 40.85     |
| 35-39      | 35       | 5        | 0.5       | 2796000    | 12141        | 0.004342  | 0.021478  | 0.978522  | 92469     | 1986      | 457378    | 3365661   | 36.40     |
| 40-44      | 40       | 5        | 0.5       | 2478000    | 13355        | 0.005389  | 0.026588  | 0.973412  | 90483     | 2406      | 446399    | 2908283   | 32.14     |
| 45-49      | 45       | 5        | 0.5       | 2195000    | 19084        | 0.008694  | 0.042547  | 0.957453  | 88077     | 3747      | 431016    | 2461885   | 27.95     |
| 50-54      | 50       | 5        | 0.5       | 1894000    | 18823        | 0.009938  | 0.048486  | 0.951514  | 84329     | 4089      | 411425    | 2030869   | 24.08     |
| 55-59      | 55       | 5        | 0.5       | 1568000    | 26066        | 0.016624  | 0.079802  | 0.920198  | 80241     | 6403      | 385195    | 1619444   | 20.18     |
| 60-64      | 60       | 5        | 0.5       | 1225000    | 26197        | 0.021385  | 0.101501  | 0.898499  | 73837     | 7495      | 350450    | 1234250   | 16.72     |
| 65-69      | 65       | 5        | 0.5       | 888000     | 32234        | 0.0363    | 0.166399  | 0.833601  | 66343     | 11039     | 304115    | 883799.6  | 13.32     |
| 70-74      | 70       | 5        | 0.5       | 602000     | 32809        | 0.0545    | 0.239824  | 0.760176  | 55303     | 13263     | 243359    | 579684.5  | 10.48     |
| 75-79      | 75       | 5        | 0.5       | 370000     | 22680        | 0.061297  | 0.26576   | 0.73424   | 42040     | 11173     | 182270    | 336325.4  | 8.00      |
| 80-85      | 80       | 5        | 0.5       | 146400     | 23995        | 0.163902  | 0.581313  | 0.418687  | 30868     | 17944     | 109479    | 154055.6  | 4.99      |
| 85+        | 85       | 0        | 0.5       | 73200      | 21222        | 0.289924  | 1         | 0         | 12924     | 12924     | 44577     | 44576.78  | 3.45      |
| All ages   |          |          |           | 36514600   | 298876       |           |           |           |           |           |           |           |           |

**GUJARAT**

Estimated abridged life table for 2019

**FEMALES**

| <i>Age</i> | <i>x</i> | <i>n</i> | <i>ax</i> | <i>pop</i> | <i>death</i> | <i>Mx</i> | <i>qx</i> | <i>px</i> | <i>lx</i> | <i>dx</i> | <i>Lx</i> | <i>Tx</i> | <i>ex</i> |
|------------|----------|----------|-----------|------------|--------------|-----------|-----------|-----------|-----------|-----------|-----------|-----------|-----------|
| <1         | 0        | 1        | 0.1       | 549000     | 13394        | 0.024398  | 0.023873  | 0.976127  | 100000    | 2387      | 97851     | 7295081   | 72.95     |
| 1-4        | 1        | 4        | 0.5       | 2140000    | 2964         | 0.001385  | 0.005525  | 0.994475  | 97613     | 539       | 389372    | 7197230   | 73.73     |
| 5-9        | 5        | 5        | 0.5       | 2645000    | 1522         | 0.000575  | 0.002873  | 0.997127  | 97073     | 279       | 484669    | 6807858   | 70.13     |
| 10-14      | 10       | 5        | 0.5       | 2658000    | 965          | 0.000363  | 0.001814  | 0.998186  | 96794     | 176       | 483533    | 6323189   | 65.33     |
| 15-19      | 15       | 5        | 0.5       | 2780000    | 2459         | 0.000885  | 0.004413  | 0.995587  | 96619     | 426       | 482028    | 5839656   | 60.44     |
| 20-24      | 20       | 5        | 0.5       | 2934000    | 3368         | 0.001148  | 0.005724  | 0.994276  | 96192     | 551       | 479586    | 5357627   | 55.70     |
| 25-29      | 25       | 5        | 0.5       | 2870000    | 3688         | 0.001285  | 0.006405  | 0.993595  | 95642     | 613       | 476678    | 4878042   | 51.00     |
| 30-34      | 30       | 5        | 0.5       | 2697000    | 2850         | 0.001057  | 0.005269  | 0.994731  | 95029     | 501       | 473895    | 4401364   | 46.32     |
| 35-39      | 35       | 5        | 0.5       | 2513000    | 5462         | 0.002173  | 0.010808  | 0.989192  | 94529     | 1022      | 470088    | 3927469   | 41.55     |
| 40-44      | 40       | 5        | 0.5       | 2284000    | 4351         | 0.001905  | 0.00948   | 0.99052   | 93507     | 886       | 465318    | 3457381   | 36.97     |
| 45-49      | 45       | 5        | 0.5       | 2053000    | 6817         | 0.003321  | 0.016467  | 0.983533  | 92620     | 1525      | 459289    | 2992063   | 32.30     |
| 50-54      | 50       | 5        | 0.5       | 1807000    | 10017        | 0.005543  | 0.027338  | 0.972662  | 91095     | 2490      | 449250    | 2532774   | 27.80     |
| 55-59      | 55       | 5        | 0.5       | 1524000    | 12848        | 0.00843   | 0.041281  | 0.958719  | 88605     | 3658      | 433880    | 2083524   | 23.51     |
| 60-64      | 60       | 5        | 0.5       | 1210000    | 16544        | 0.013673  | 0.066105  | 0.933895  | 84947     | 5615      | 410697    | 1649644   | 19.42     |
| 65-69      | 65       | 5        | 0.5       | 925000     | 21002        | 0.022704  | 0.107425  | 0.892575  | 79332     | 8522      | 375353    | 1238947   | 15.62     |
| 70-74      | 70       | 5        | 0.5       | 685000     | 28174        | 0.04113   | 0.186475  | 0.813525  | 70810     | 13204     | 321037    | 863593.9  | 12.20     |
| 75-79      | 75       | 5        | 0.5       | 462000     | 28399        | 0.061469  | 0.266407  | 0.733593  | 57605     | 15346     | 249660    | 542556.9  | 9.42      |
| 80-85      | 80       | 5        | 0.5       | 165940     | 18239        | 0.109911  | 0.431098  | 0.568902  | 42259     | 18218     | 165750    | 292896.7  | 6.93      |
| 85+        | 85       | 0        | 0.5       | 132752     | 25101        | 0.189081  | 1         | 0         | 24041     | 24041     | 127147    | 127146.9  | 5.29      |
| All ages   |          |          |           | 33034692   | 208165       |           |           |           |           |           |           |           |           |

**HARYANA**

Estimated abridged life table for 2019

**MALES**

| <i>Age</i> | <i>x</i> | <i>n</i> | <i>ax</i> | <i>pop</i> | <i>death</i> | <i>Mx</i> | <i>qx</i> | <i>px</i> | <i>lx</i> | <i>dx</i> | <i>Lx</i> | <i>Tx</i> | <i>ex</i> |
|------------|----------|----------|-----------|------------|--------------|-----------|-----------|-----------|-----------|-----------|-----------|-----------|-----------|
| <1         | 0        | 1        | 0.1       | 267000     | 6344         | 0.023761  | 0.023264  | 0.976736  | 100000    | 2326      | 97906     | 6652214   | 66.52     |
| 1-4        | 1        | 4        | 0.5       | 1049000    | 3444         | 0.003283  | 0.013045  | 0.986955  | 97674     | 1274      | 388146    | 6554308   | 67.10     |
| 5-9        | 5        | 5        | 0.5       | 1365000    | 553          | 0.000405  | 0.002024  | 0.997976  | 96399     | 195       | 481510    | 6166162   | 63.96     |
| 10-14      | 10       | 5        | 0.5       | 1332000    | 777          | 0.000583  | 0.002913  | 0.997087  | 96204     | 280       | 480321    | 5684652   | 59.09     |
| 15-19      | 15       | 5        | 0.5       | 1421000    | 792          | 0.000557  | 0.002782  | 0.997218  | 95924     | 267       | 478954    | 5204331   | 54.25     |
| 20-24      | 20       | 5        | 0.5       | 1515000    | 2630         | 0.001736  | 0.008642  | 0.991358  | 95657     | 827       | 476220    | 4725377   | 49.40     |
| 25-29      | 25       | 5        | 0.5       | 1509000    | 3331         | 0.002207  | 0.010976  | 0.989024  | 94831     | 1041      | 471551    | 4249158   | 44.81     |
| 30-34      | 30       | 5        | 0.5       | 1381000    | 2326         | 0.001684  | 0.008386  | 0.991614  | 93790     | 787       | 466982    | 3777607   | 40.28     |
| 35-39      | 35       | 5        | 0.5       | 1184000    | 3368         | 0.002845  | 0.014123  | 0.985877  | 93003     | 1313      | 461732    | 3310625   | 35.60     |
| 40-44      | 40       | 5        | 0.5       | 1000000    | 4648         | 0.004648  | 0.022973  | 0.977027  | 91690     | 2106      | 453182    | 2848892   | 31.07     |
| 45-49      | 45       | 5        | 0.5       | 870000     | 6733         | 0.007739  | 0.037959  | 0.962041  | 89583     | 3400      | 439415    | 2395710   | 26.74     |
| 50-54      | 50       | 5        | 0.5       | 739000     | 5264         | 0.007123  | 0.034994  | 0.965006  | 86183     | 3016      | 423374    | 1956295   | 22.70     |
| 55-59      | 55       | 5        | 0.5       | 593000     | 9264         | 0.015623  | 0.075177  | 0.924823  | 83167     | 6252      | 400204    | 1532920   | 18.43     |
| 60-64      | 60       | 5        | 0.5       | 447000     | 11291        | 0.02526   | 0.118798  | 0.881202  | 76915     | 9137      | 361730    | 1132716   | 14.73     |
| 65-69      | 65       | 5        | 0.5       | 340000     | 25973        | 0.076391  | 0.320707  | 0.679293  | 67777     | 21737     | 284545    | 770986.4  | 11.38     |
| 70-74      | 70       | 5        | 0.5       | 272000     | 12664        | 0.046557  | 0.208517  | 0.791483  | 46041     | 9600      | 206203    | 486441.2  | 10.57     |
| 75-79      | 75       | 5        | 0.5       | 179000     | 12746        | 0.071205  | 0.302226  | 0.697774  | 36440     | 11013     | 154669    | 280238.3  | 7.69      |
| 80-85      | 80       | 5        | 0.5       | 62492      | 10021        | 0.160354  | 0.572332  | 0.427668  | 25427     | 14553     | 90754     | 125569.3  | 4.94      |
| 85+        | 85       | 0        | 0.5       | 31246      | 9760         | 0.312344  | 1         | 0         | 10874     | 10874     | 34815     | 34815.39  | 3.20      |
| All ages   |          |          |           | 15556738   | 131928       |           |           |           |           |           |           |           |           |

**HARYANA**

Estimated abridged life table for 2019

**FEMALES**

| <i>Age</i> | <i>x</i> | <i>n</i> | <i>ax</i> | <i>pop</i> | <i>death</i> | <i>Mx</i> | <i>qx</i> | <i>px</i> | <i>lx</i> | <i>dx</i> | <i>Lx</i> | <i>Tx</i> | <i>ex</i> |
|------------|----------|----------|-----------|------------|--------------|-----------|-----------|-----------|-----------|-----------|-----------|-----------|-----------|
| <1         | 0        | 1        | 0.1       | 228000     | 5343         | 0.023433  | 0.022949  | 0.977051  | 100000    | 2295      | 97935     | 7193926   | 71.94     |
| 1-4        | 1        | 4        | 0.5       | 890000     | 3003         | 0.003375  | 0.013408  | 0.986592  | 97705     | 1310      | 388200    | 7095991   | 72.63     |
| 5-9        | 5        | 5        | 0.5       | 1124000    | 453          | 0.000403  | 0.002012  | 0.997988  | 96395     | 194       | 481490    | 6707791   | 69.59     |
| 10-14      | 10       | 5        | 0.5       | 1106000    | 458          | 0.000414  | 0.002069  | 0.997931  | 96201     | 199       | 480507    | 6226301   | 64.72     |
| 15-19      | 15       | 5        | 0.5       | 1184000    | 683          | 0.000577  | 0.002882  | 0.997118  | 96002     | 277       | 479318    | 5745793   | 59.85     |
| 20-24      | 20       | 5        | 0.5       | 1296000    | 1060         | 0.000818  | 0.00408   | 0.99592   | 95725     | 391       | 477650    | 5266475   | 55.02     |
| 25-29      | 25       | 5        | 0.5       | 1283000    | 1764         | 0.001375  | 0.00685   | 0.99315   | 95335     | 653       | 475041    | 4788825   | 50.23     |
| 30-34      | 30       | 5        | 0.5       | 1179000    | 913          | 0.000775  | 0.003866  | 0.996134  | 94682     | 366       | 472493    | 4313784   | 45.56     |
| 35-39      | 35       | 5        | 0.5       | 1060000    | 1625         | 0.001533  | 0.007636  | 0.992364  | 94316     | 720       | 469778    | 3841291   | 40.73     |
| 40-44      | 40       | 5        | 0.5       | 932000     | 2261         | 0.002426  | 0.012056  | 0.987944  | 93595     | 1128      | 465156    | 3371513   | 36.02     |
| 45-49      | 45       | 5        | 0.5       | 824000     | 2853         | 0.003462  | 0.017161  | 0.982839  | 92467     | 1587      | 458368    | 2906357   | 31.43     |
| 50-54      | 50       | 5        | 0.5       | 700000     | 3665         | 0.005236  | 0.025841  | 0.974159  | 90880     | 2348      | 448530    | 2447988   | 26.94     |
| 55-59      | 55       | 5        | 0.5       | 562000     | 4273         | 0.007603  | 0.037307  | 0.962693  | 88532     | 3303      | 434402    | 1999458   | 22.58     |
| 60-64      | 60       | 5        | 0.5       | 438000     | 6776         | 0.01547   | 0.07447   | 0.92553   | 85229     | 6347      | 410277    | 1565056   | 18.36     |
| 65-69      | 65       | 5        | 0.5       | 365000     | 19016        | 0.052099  | 0.230476  | 0.769524  | 78882     | 18180     | 348959    | 1154779   | 14.64     |
| 70-74      | 70       | 5        | 0.5       | 304000     | 9427         | 0.031009  | 0.143892  | 0.856108  | 60702     | 8734      | 281672    | 805820.3  | 13.28     |
| 75-79      | 75       | 5        | 0.5       | 203000     | 7957         | 0.039197  | 0.178495  | 0.821505  | 51967     | 9276      | 236646    | 524148.5  | 10.09     |
| 80-85      | 80       | 5        | 0.5       | 69300      | 7368         | 0.106315  | 0.419956  | 0.580044  | 42691     | 17928     | 168635    | 287502.5  | 6.73      |
| 85+        | 85       | 0        | 0.5       | 41580      | 8662         | 0.208323  | 1         | 0         | 24763     | 24763     | 118867    | 118867.2  | 4.80      |
| All ages   |          |          |           | 13788880   | 87560        |           |           |           |           |           |           |           |           |



**HIMACHAL PRADESH**

Estimated abridged life table for 2019

**MALES**

| <i>Age</i> | <i>x</i> | <i>n</i> | <i>ax</i> | <i>pop</i> | <i>death</i> | <i>Mx</i> | <i>qx</i> | <i>px</i> | <i>lx</i> | <i>dx</i> | <i>Lx</i> | <i>Tx</i> | <i>ex</i> |
|------------|----------|----------|-----------|------------|--------------|-----------|-----------|-----------|-----------|-----------|-----------|-----------|-----------|
| <1         | 0        | 1        | 0.1       | 49000      | 862          | 0.017595  | 0.01732   | 0.98268   | 100000    | 1732      | 98441     | 7227511   | 72.28     |
| 1-4        | 1        | 4        | 0.5       | 194000     | 244          | 0.001258  | 0.005019  | 0.994981  | 98268     | 493       | 392085    | 7129070   | 72.55     |
| 5-9        | 5        | 5        | 0.5       | 263000     | 179          | 0.000682  | 0.003405  | 0.996595  | 97775     | 333       | 488042    | 6736984   | 68.90     |
| 10-14      | 10       | 5        | 0.5       | 294000     | 20           | 6.68E-05  | 0.000334  | 0.999666  | 97442     | 33        | 487128    | 6248943   | 64.13     |
| 15-19      | 15       | 5        | 0.5       | 315000     | 6            | 2E-05     | 0.0001    | 0.9999    | 97409     | 10        | 487022    | 5761815   | 59.15     |
| 20-24      | 20       | 5        | 0.5       | 334000     | 648          | 0.00194   | 0.009651  | 0.990349  | 97400     | 940       | 484648    | 5274793   | 54.16     |
| 25-29      | 25       | 5        | 0.5       | 335000     | 597          | 0.001781  | 0.008868  | 0.991132  | 96460     | 855       | 480160    | 4790145   | 49.66     |
| 30-34      | 30       | 5        | 0.5       | 317000     | 355          | 0.001121  | 0.00559   | 0.99441   | 95604     | 534       | 476685    | 4309985   | 45.08     |
| 35-39      | 35       | 5        | 0.5       | 290000     | 716          | 0.00247   | 0.012275  | 0.987725  | 95070     | 1167      | 472432    | 3833300   | 40.32     |
| 40-44      | 40       | 5        | 0.5       | 267000     | 866          | 0.003243  | 0.016085  | 0.983915  | 93903     | 1510      | 465738    | 3360868   | 35.79     |
| 45-49      | 45       | 5        | 0.5       | 244000     | 1210         | 0.004959  | 0.024491  | 0.975509  | 92392     | 2263      | 456305    | 2895130   | 31.34     |
| 50-54      | 50       | 5        | 0.5       | 214000     | 1523         | 0.007119  | 0.034972  | 0.965028  | 90130     | 3152      | 442768    | 2438825   | 27.06     |
| 55-59      | 55       | 5        | 0.5       | 181000     | 2274         | 0.012562  | 0.060896  | 0.939104  | 86978     | 5297      | 421647    | 1996057   | 22.95     |
| 60-64      | 60       | 5        | 0.5       | 147000     | 2150         | 0.014626  | 0.070551  | 0.929449  | 81681     | 5763      | 393998    | 1574411   | 19.28     |
| 65-69      | 65       | 5        | 0.5       | 113000     | 2637         | 0.02334   | 0.110266  | 0.889734  | 75918     | 8371      | 358664    | 1180412   | 15.55     |
| 70-74      | 70       | 5        | 0.5       | 82000      | 2689         | 0.032795  | 0.151552  | 0.848448  | 67547     | 10237     | 312144    | 821748.1  | 12.17     |
| 75-79      | 75       | 5        | 0.5       | 54000      | 3969         | 0.073499  | 0.310452  | 0.689548  | 57310     | 17792     | 242071    | 509604.5  | 8.89      |
| 80-85      | 80       | 5        | 0.5       | 30000      | 3885         | 0.1295    | 0.489141  | 0.510859  | 39518     | 19330     | 149266    | 267533.3  | 6.77      |
| 85+        | 85       | 0        | 0.5       | 18750      | 3201         | 0.1707    | 1         | 0         | 20188     | 20188     | 118267    | 118267.3  | 5.86      |
| All ages   |          |          |           | 3741750    | 28032        |           |           |           |           |           |           |           |           |

**HIMACHAL PRADESH**

Estimated abridged life table for 2019

**FEMALES**

| <i>Age</i> | <i>x</i> | <i>n</i> | <i>ax</i> | <i>pop</i> | <i>death</i> | <i>Mx</i> | <i>qx</i> | <i>px</i> | <i>lx</i> | <i>dx</i> | <i>Lx</i> | <i>Tx</i> | <i>ex</i> |
|------------|----------|----------|-----------|------------|--------------|-----------|-----------|-----------|-----------|-----------|-----------|-----------|-----------|
| <1         | 0        | 1        | 0.1       | 45000      | 838          | 0.018613  | 0.018306  | 0.981694  | 100000    | 1831      | 98352     | 7612814   | 76.13     |
| 1-4        | 1        | 4        | 0.5       | 177000     | 310          | 0.001752  | 0.006984  | 0.993016  | 98169     | 686       | 391306    | 7514462   | 76.55     |
| 5-9        | 5        | 5        | 0.5       | 236000     | 179          | 0.000758  | 0.003784  | 0.996216  | 97484     | 369       | 486497    | 7123156   | 73.07     |
| 10-14      | 10       | 5        | 0.5       | 262000     | 6            | 2.47E-05  | 0.000124  | 0.999876  | 97115     | 12        | 485545    | 6636659   | 68.34     |
| 15-19      | 15       | 5        | 0.5       | 278000     | 134          | 0.000482  | 0.002409  | 0.997591  | 97103     | 234       | 484930    | 6151114   | 63.35     |
| 20-24      | 20       | 5        | 0.5       | 294000     | 361          | 0.001228  | 0.006122  | 0.993878  | 96869     | 593       | 482862    | 5666185   | 58.49     |
| 25-29      | 25       | 5        | 0.5       | 303000     | 346          | 0.001143  | 0.005699  | 0.994301  | 96276     | 549       | 480008    | 5183323   | 53.84     |
| 30-34      | 30       | 5        | 0.5       | 307000     | 188          | 0.000612  | 0.003056  | 0.996944  | 95727     | 292       | 477905    | 4703315   | 49.13     |
| 35-39      | 35       | 5        | 0.5       | 295000     | 422          | 0.00143   | 0.007125  | 0.992875  | 95435     | 680       | 475473    | 4225411   | 44.28     |
| 40-44      | 40       | 5        | 0.5       | 274000     | 354          | 0.001292  | 0.006437  | 0.993563  | 94755     | 610       | 472249    | 3749937   | 39.58     |
| 45-49      | 45       | 5        | 0.5       | 251000     | 342          | 0.001363  | 0.006791  | 0.993209  | 94145     | 639       | 469125    | 3277689   | 34.82     |
| 50-54      | 50       | 5        | 0.5       | 221000     | 1107         | 0.005009  | 0.024736  | 0.975264  | 93505     | 2313      | 461745    | 2808563   | 30.04     |
| 55-59      | 55       | 5        | 0.5       | 188000     | 1067         | 0.005674  | 0.027974  | 0.972026  | 91192     | 2551      | 449585    | 2346819   | 25.73     |
| 60-64      | 60       | 5        | 0.5       | 155000     | 1806         | 0.01165   | 0.056604  | 0.943396  | 88641     | 5017      | 430663    | 1897234   | 21.40     |
| 65-69      | 65       | 5        | 0.5       | 122000     | 1997         | 0.016367  | 0.078618  | 0.921382  | 83624     | 6574      | 401684    | 1466571   | 17.54     |
| 70-74      | 70       | 5        | 0.5       | 93000      | 2043         | 0.021968  | 0.104121  | 0.895879  | 77050     | 8022      | 365192    | 1064887   | 13.82     |
| 75-79      | 75       | 5        | 0.5       | 65000      | 2824         | 0.043441  | 0.195926  | 0.804074  | 69027     | 13524     | 311325    | 699695.5  | 10.14     |
| 80-85      | 80       | 5        | 0.5       | 36440      | 3617         | 0.099265  | 0.397643  | 0.602357  | 55503     | 22070     | 222339    | 388370.6  | 7.00      |
| 85+        | 85       | 0        | 0.5       | 25508      | 5136         | 0.201362  | 1         | 0         | 33433     | 33433     | 166032    | 166032    | 4.97      |
| All ages   |          |          |           | 3627948    | 23077        |           |           |           |           |           |           |           |           |

**JAMMU & KASHMIR**

Estimated abridged life table for 2019

**MALES**

| <i>Age</i> | <i>x</i> | <i>n</i> | <i>ax</i> | <i>pop</i> | <i>death</i> | <i>Mx</i> | <i>qx</i> | <i>px</i> | <i>lx</i> | <i>dx</i> | <i>Lx</i> | <i>Tx</i> | <i>ex</i> |
|------------|----------|----------|-----------|------------|--------------|-----------|-----------|-----------|-----------|-----------|-----------|-----------|-----------|
| <1         | 0        | 1        | 0.1       | 88000      | 2525         | 0.028695  | 0.027973  | 0.972027  | 100000    | 2797      | 97482     | 7216017   | 72.16     |
| 1-4        | 1        | 4        | 0.5       | 346000     | 104          | 0.0003    | 0.001199  | 0.998801  | 97203     | 117       | 388578    | 7118535   | 73.23     |
| 5-9        | 5        | 5        | 0.5       | 469000     | 188          | 0.0004    | 0.001998  | 0.998002  | 97086     | 194       | 484946    | 6729957   | 69.32     |
| 10-14      | 10       | 5        | 0.5       | 765000     | 306          | 0.0004    | 0.001998  | 0.998002  | 96892     | 194       | 483977    | 6245011   | 64.45     |
| 15-19      | 15       | 5        | 0.5       | 732000     | 293          | 0.0004    | 0.001998  | 0.998002  | 96699     | 193       | 483010    | 5761034   | 59.58     |
| 20-24      | 20       | 5        | 0.5       | 698000     | 349          | 0.0005    | 0.002497  | 0.997503  | 96505     | 241       | 481925    | 5278024   | 54.69     |
| 25-29      | 25       | 5        | 0.5       | 634000     | 507          | 0.0008    | 0.003992  | 0.996008  | 96264     | 384       | 480361    | 4796100   | 49.82     |
| 30-34      | 30       | 5        | 0.5       | 581000     | 988          | 0.0017    | 0.008464  | 0.991536  | 95880     | 812       | 477372    | 4315738   | 45.01     |
| 35-39      | 35       | 5        | 0.5       | 538000     | 1076         | 0.002     | 0.00995   | 0.99005   | 95069     | 946       | 472978    | 3838366   | 40.37     |
| 40-44      | 40       | 5        | 0.5       | 478000     | 2247         | 0.0047    | 0.023227  | 0.976773  | 94123     | 2186      | 465148    | 3365388   | 35.76     |
| 45-49      | 45       | 5        | 0.5       | 417000     | 2502         | 0.006     | 0.029557  | 0.970443  | 91936     | 2717      | 452889    | 2900240   | 31.55     |
| 50-54      | 50       | 5        | 0.5       | 357000     | 2999         | 0.0084    | 0.041136  | 0.958864  | 89219     | 3670      | 436920    | 2447351   | 27.43     |
| 55-59      | 55       | 5        | 0.5       | 289000     | 3584         | 0.0124    | 0.060136  | 0.939864  | 85549     | 5145      | 414884    | 2010431   | 23.50     |
| 60-64      | 60       | 5        | 0.5       | 218000     | 4709         | 0.0216    | 0.102467  | 0.897533  | 80404     | 8239      | 381425    | 1595547   | 19.84     |
| 65-69      | 65       | 5        | 0.5       | 160000     | 3920         | 0.0245    | 0.11543   | 0.88457   | 72166     | 8330      | 340003    | 1214122   | 16.82     |
| 70-74      | 70       | 5        | 0.5       | 116000     | 4273         | 0.036839  | 0.168661  | 0.831339  | 63836     | 10767     | 292262    | 874118.9  | 13.69     |
| 75-79      | 75       | 5        | 0.5       | 74000      | 4374         | 0.059115  | 0.257516  | 0.742484  | 53069     | 13666     | 231180    | 581857.4  | 10.96     |
| 80-85      | 80       | 5        | 0.5       | 42180      | 3964         | 0.093979  | 0.380498  | 0.619502  | 39403     | 14993     | 159533    | 350677.5  | 8.90      |
| 85+        | 85       | 0        | 0.5       | 35150      | 4489         | 0.127705  | 1         | 0         | 24410     | 24410     | 191145    | 191144.9  | 7.83      |
| All ages   |          |          |           | 7037330    | 43396        |           |           |           |           |           |           |           |           |

**JAMMU & KASHMIR**

Estimated abridged life table for 2019

**FEMALES**

| <i>Age</i> | <i>x</i> | <i>n</i> | <i>ax</i> | <i>pop</i> | <i>death</i> | <i>Mx</i> | <i>qx</i> | <i>px</i> | <i>lx</i> | <i>dx</i> | <i>Lx</i> | <i>Tx</i> | <i>ex</i> |
|------------|----------|----------|-----------|------------|--------------|-----------|-----------|-----------|-----------|-----------|-----------|-----------|-----------|
| <1         | 0        | 1        | 0.1       | 82000      | 1757         | 0.021428  | 0.021022  | 0.978978  | 100000    | 2102      | 98108     | 7570341   | 75.70     |
| 1-4        | 1        | 4        | 0.5       | 323000     | 168          | 0.00052   | 0.002076  | 0.997924  | 97898     | 203       | 391185    | 7472233   | 76.33     |
| 5-9        | 5        | 5        | 0.5       | 436000     | 218          | 0.0005    | 0.002497  | 0.997503  | 97695     | 244       | 487863    | 7081048   | 72.48     |
| 10-14      | 10       | 5        | 0.5       | 657000     | 263          | 0.0004    | 0.001998  | 0.998002  | 97451     | 195       | 486766    | 6593185   | 67.66     |
| 15-19      | 15       | 5        | 0.5       | 646000     | 258          | 0.0004    | 0.001998  | 0.998002  | 97256     | 194       | 485794    | 6106419   | 62.79     |
| 20-24      | 20       | 5        | 0.5       | 628000     | 188          | 0.0003    | 0.001499  | 0.998501  | 97062     | 145       | 484944    | 5620625   | 57.91     |
| 25-29      | 25       | 5        | 0.5       | 584000     | 292          | 0.0005    | 0.002497  | 0.997503  | 96916     | 242       | 483975    | 5135681   | 52.99     |
| 30-34      | 30       | 5        | 0.5       | 536000     | 429          | 0.0008    | 0.003992  | 0.996008  | 96674     | 386       | 482406    | 4651706   | 48.12     |
| 35-39      | 35       | 5        | 0.5       | 482000     | 482          | 0.001     | 0.004988  | 0.995012  | 96288     | 480       | 480240    | 4169300   | 43.30     |
| 40-44      | 40       | 5        | 0.5       | 425000     | 935          | 0.0022    | 0.01094   | 0.98906   | 95808     | 1048      | 476419    | 3689060   | 38.50     |
| 45-49      | 45       | 5        | 0.5       | 373000     | 1492         | 0.004     | 0.019802  | 0.980198  | 94760     | 1876      | 469108    | 3212640   | 33.90     |
| 50-54      | 50       | 5        | 0.5       | 317000     | 2156         | 0.0068    | 0.033432  | 0.966568  | 92883     | 3105      | 456654    | 2743532   | 29.54     |
| 55-59      | 55       | 5        | 0.5       | 258000     | 2761         | 0.0107    | 0.052106  | 0.947894  | 89778     | 4678      | 437196    | 2286879   | 25.47     |
| 60-64      | 60       | 5        | 0.5       | 199000     | 2647         | 0.0133    | 0.06436   | 0.93564   | 85100     | 5477      | 411808    | 1849683   | 21.74     |
| 65-69      | 65       | 5        | 0.5       | 153000     | 3410         | 0.022286  | 0.105549  | 0.894451  | 79623     | 8404      | 377105    | 1437875   | 18.06     |
| 70-74      | 70       | 5        | 0.5       | 117000     | 2991         | 0.025563  | 0.120138  | 0.879862  | 71219     | 8556      | 334705    | 1060770   | 14.89     |
| 75-79      | 75       | 5        | 0.5       | 81000      | 3536         | 0.043659  | 0.196811  | 0.803189  | 62663     | 12333     | 282483    | 726064.9  | 11.59     |
| 80-85      | 80       | 5        | 0.5       | 31890      | 3673         | 0.115189  | 0.447171  | 0.552829  | 50330     | 22506     | 195385    | 443582.3  | 8.81      |
| 85+        | 85       | 0        | 0.5       | 31890      | 3575         | 0.112104  | 1         | 0         | 27824     | 27824     | 248197    | 248197.2  | 8.92      |
| All ages   |          |          |           | 6360780    | 31231        |           |           |           |           |           |           |           |           |

**JHARKHAND**

Estimated abridged life table for 2019

**MALES**

| <i>Age</i> | <i>x</i> | <i>n</i> | <i>ax</i> | <i>pop</i> | <i>death</i> | <i>Mx</i> | <i>qx</i> | <i>px</i> | <i>lx</i> | <i>dx</i> | <i>Lx</i> | <i>Tx</i> | <i>ex</i> |
|------------|----------|----------|-----------|------------|--------------|-----------|-----------|-----------|-----------|-----------|-----------|-----------|-----------|
| <1         | 0        | 1        | 0.1       | 388000     | 16502        | 0.042531  | 0.040963  | 0.959037  | 100000    | 4096      | 96313     | 6826071   | 68.26     |
| 1-4        | 1        | 4        | 0.5       | 1519000    | 3599         | 0.002369  | 0.009432  | 0.990568  | 95904     | 905       | 381806    | 6729758   | 70.17     |
| 5-9        | 5        | 5        | 0.5       | 1891000    | 378          | 0.0002    | 0.001     | 0.999     | 94999     | 95        | 474758    | 6347952   | 66.82     |
| 10-14      | 10       | 5        | 0.5       | 2003000    | 801          | 0.0004    | 0.001998  | 0.998002  | 94904     | 190       | 474047    | 5873194   | 61.89     |
| 15-19      | 15       | 5        | 0.5       | 2034000    | 1748         | 0.000859  | 0.004288  | 0.995712  | 94715     | 406       | 472558    | 5399147   | 57.00     |
| 20-24      | 20       | 5        | 0.5       | 1992000    | 1596         | 0.000801  | 0.003998  | 0.996002  | 94308     | 377       | 470600    | 4926589   | 52.24     |
| 25-29      | 25       | 5        | 0.5       | 1718000    | 2924         | 0.001702  | 0.008474  | 0.991526  | 93931     | 796       | 467667    | 4455989   | 47.44     |
| 30-34      | 30       | 5        | 0.5       | 1454000    | 3344         | 0.0023    | 0.011434  | 0.988566  | 93135     | 1065      | 463015    | 3988322   | 42.82     |
| 35-39      | 35       | 5        | 0.5       | 1292000    | 2455         | 0.0019    | 0.009455  | 0.990545  | 92071     | 871       | 458176    | 3525307   | 38.29     |
| 40-44      | 40       | 5        | 0.5       | 1158000    | 3937         | 0.0034    | 0.016857  | 0.983143  | 91200     | 1537      | 452157    | 3067130   | 33.63     |
| 45-49      | 45       | 5        | 0.5       | 1028000    | 5860         | 0.0057    | 0.0281    | 0.9719    | 89663     | 2519      | 442015    | 2614974   | 29.16     |
| 50-54      | 50       | 5        | 0.5       | 883000     | 6534         | 0.0074    | 0.036328  | 0.963672  | 87143     | 3166      | 427802    | 2172959   | 24.94     |
| 55-59      | 55       | 5        | 0.5       | 721000     | 9301         | 0.0129    | 0.062485  | 0.937515  | 83977     | 5247      | 406769    | 1745157   | 20.78     |
| 60-64      | 60       | 5        | 0.5       | 553000     | 10894        | 0.0197    | 0.093877  | 0.906123  | 78730     | 7391      | 375173    | 1338388   | 17.00     |
| 65-69      | 65       | 5        | 0.5       | 421000     | 15992        | 0.037986  | 0.173458  | 0.826542  | 71339     | 12374     | 325760    | 963214.5  | 13.50     |
| 70-74      | 70       | 5        | 0.5       | 319000     | 14897        | 0.0467    | 0.209089  | 0.790911  | 58965     | 12329     | 264002    | 637454.4  | 10.81     |
| 75-79      | 75       | 5        | 0.5       | 208000     | 18387        | 0.0884    | 0.361998  | 0.638002  | 46636     | 16882     | 190974    | 373452.4  | 8.01      |
| 80-85      | 80       | 5        | 0.5       | 59103      | 6531         | 0.1105    | 0.432909  | 0.567091  | 29754     | 12881     | 116567    | 182478    | 6.13      |
| 85+        | 85       | 0        | 0.5       | 19701      | 5043         | 0.256     | 1         | 0         | 16873     | 16873     | 65911     | 65910.63  | 3.91      |
| All ages   |          |          |           | 19660804   | 130724       |           |           |           |           |           |           |           |           |

**JHARKHAND**

Estimated abridged life table for 2019

**FEMALES**

| <i>Age</i> | <i>x</i> | <i>n</i> | <i>ax</i> | <i>pop</i> | <i>death</i> | <i>Mx</i> | <i>qx</i> | <i>px</i> | <i>lx</i> | <i>dx</i> | <i>Lx</i> | <i>Tx</i> | <i>ex</i> |
|------------|----------|----------|-----------|------------|--------------|-----------|-----------|-----------|-----------|-----------|-----------|-----------|-----------|
| <1         | 0        | 1        | 0.1       | 359000     | 11996        | 0.033415  | 0.032439  | 0.967561  | 100000    | 3244      | 97080     | 6928877   | 69.29     |
| 1-4        | 1        | 4        | 0.5       | 1395000    | 3467         | 0.002485  | 0.009891  | 0.990109  | 96756     | 957       | 385110    | 6831796   | 70.61     |
| 5-9        | 5        | 5        | 0.5       | 1718000    | 1031         | 0.0006    | 0.002996  | 0.997004  | 95799     | 287       | 478278    | 6446686   | 67.29     |
| 10-14      | 10       | 5        | 0.5       | 1939000    | 776          | 0.0004    | 0.001998  | 0.998002  | 95512     | 191       | 477083    | 5968408   | 62.49     |
| 15-19      | 15       | 5        | 0.5       | 1952000    | 1757         | 0.0009    | 0.00449   | 0.99551   | 95321     | 428       | 475536    | 5491325   | 57.61     |
| 20-24      | 20       | 5        | 0.5       | 1881000    | 1881         | 0.001     | 0.004988  | 0.995012  | 94893     | 473       | 473283    | 5015789   | 52.86     |
| 25-29      | 25       | 5        | 0.5       | 1593000    | 1752         | 0.0011    | 0.005485  | 0.994515  | 94420     | 518       | 470805    | 4542505   | 48.11     |
| 30-34      | 30       | 5        | 0.5       | 1387000    | 1942         | 0.0014    | 0.006976  | 0.993024  | 93902     | 655       | 467873    | 4071700   | 43.36     |
| 35-39      | 35       | 5        | 0.5       | 1271000    | 2415         | 0.0019    | 0.009455  | 0.990545  | 93247     | 882       | 464031    | 3603827   | 38.65     |
| 40-44      | 40       | 5        | 0.5       | 1134000    | 4536         | 0.004     | 0.019802  | 0.980198  | 92365     | 1829      | 457255    | 3139796   | 33.99     |
| 45-49      | 45       | 5        | 0.5       | 994000     | 3877         | 0.0039    | 0.019312  | 0.980688  | 90536     | 1748      | 448311    | 2682541   | 29.63     |
| 50-54      | 50       | 5        | 0.5       | 840000     | 6552         | 0.0078    | 0.038254  | 0.961746  | 88788     | 3396      | 435449    | 2234230   | 25.16     |
| 55-59      | 55       | 5        | 0.5       | 678000     | 9424         | 0.0139    | 0.067166  | 0.932834  | 85391     | 5735      | 412619    | 1798782   | 21.07     |
| 60-64      | 60       | 5        | 0.5       | 533000     | 12685        | 0.0238    | 0.112317  | 0.887683  | 79656     | 8947      | 375914    | 1386163   | 17.40     |
| 65-69      | 65       | 5        | 0.5       | 431000     | 14525        | 0.0337    | 0.155407  | 0.844593  | 70709     | 10989     | 326075    | 1010249   | 14.29     |
| 70-74      | 70       | 5        | 0.5       | 331000     | 14829        | 0.0448    | 0.201439  | 0.798561  | 59721     | 12030     | 268528    | 684174.3  | 11.46     |
| 75-79      | 75       | 5        | 0.5       | 213000     | 15993        | 0.075087  | 0.316097  | 0.683903  | 47691     | 15075     | 200766    | 415646.3  | 8.72      |
| 80-85      | 80       | 5        | 0.5       | 56310      | 6913         | 0.122767  | 0.469681  | 0.530319  | 32616     | 15319     | 124781    | 214880.6  | 6.59      |
| 85+        | 85       | 0        | 0.5       | 37540      | 7207         | 0.191974  | 1         | 0         | 17297     | 17297     | 90099     | 90099.38  | 5.21      |
| All ages   |          |          |           | 18742850   | 123557       |           |           |           |           |           |           |           |           |

**KARNATAKA**

Estimated abridged life table for 2019

**MALES**

| <i>Age</i> | <i>x</i> | <i>n</i> | <i>ax</i> | <i>pop</i> | <i>death</i> | <i>Mx</i> | <i>qx</i> | <i>px</i> | <i>lx</i> | <i>dx</i> | <i>Lx</i> | <i>Tx</i> | <i>ex</i> |
|------------|----------|----------|-----------|------------|--------------|-----------|-----------|-----------|-----------|-----------|-----------|-----------|-----------|
| <1         | 0        | 1        | 0.1       | 491000     | 10339        | 0.021057  | 0.020665  | 0.979335  | 100000    | 2067      | 98140     | 6636639   | 66.37     |
| 1-4        | 1        | 4        | 0.5       | 1934000    | 2719         | 0.001406  | 0.005608  | 0.994392  | 97933     | 549       | 390635    | 6538499   | 66.76     |
| 5-9        | 5        | 5        | 0.5       | 2625000    | 1879         | 0.000716  | 0.003572  | 0.996428  | 97384     | 348       | 486052    | 6147863   | 63.13     |
| 10-14      | 10       | 5        | 0.5       | 2599000    | 1725         | 0.000664  | 0.003313  | 0.996687  | 97036     | 322       | 484378    | 5661812   | 58.35     |
| 15-19      | 15       | 5        | 0.5       | 2763000    | 1719         | 0.000622  | 0.003107  | 0.996893  | 96715     | 300       | 482823    | 5177434   | 53.53     |
| 20-24      | 20       | 5        | 0.5       | 2956000    | 6601         | 0.002233  | 0.011103  | 0.988897  | 96414     | 1070      | 479396    | 4694611   | 48.69     |
| 25-29      | 25       | 5        | 0.5       | 3063000    | 7341         | 0.002397  | 0.011912  | 0.988088  | 95344     | 1136      | 473880    | 4215215   | 44.21     |
| 30-34      | 30       | 5        | 0.5       | 3022000    | 10354        | 0.003426  | 0.016985  | 0.983015  | 94208     | 1600      | 467040    | 3741335   | 39.71     |
| 35-39      | 35       | 5        | 0.5       | 2766000    | 12125        | 0.004384  | 0.021681  | 0.978319  | 92608     | 2008      | 458020    | 3274295   | 35.36     |
| 40-44      | 40       | 5        | 0.5       | 2417000    | 17307        | 0.00716   | 0.035172  | 0.964828  | 90600     | 3187      | 445034    | 2816274   | 31.08     |
| 45-49      | 45       | 5        | 0.5       | 2152000    | 22366        | 0.010393  | 0.050649  | 0.949351  | 87414     | 4427      | 425999    | 2371240   | 27.13     |
| 50-54      | 50       | 5        | 0.5       | 1891000    | 21109        | 0.011163  | 0.0543    | 0.9457    | 82986     | 4506      | 403665    | 1945241   | 23.44     |
| 55-59      | 55       | 5        | 0.5       | 1581000    | 21343        | 0.0135    | 0.065296  | 0.934704  | 78480     | 5124      | 379589    | 1541575   | 19.64     |
| 60-64      | 60       | 5        | 0.5       | 1225000    | 34224        | 0.027938  | 0.130569  | 0.869431  | 73356     | 9578      | 342833    | 1161986   | 15.84     |
| 65-69      | 65       | 5        | 0.5       | 914000     | 37905        | 0.041472  | 0.18788   | 0.81212   | 63778     | 11983     | 288932    | 819153.1  | 12.84     |
| 70-74      | 70       | 5        | 0.5       | 688000     | 33637        | 0.04889   | 0.217828  | 0.782172  | 51795     | 11282     | 230770    | 530221.1  | 10.24     |
| 75-79      | 75       | 5        | 0.5       | 450000     | 32310        | 0.0718    | 0.304366  | 0.695634  | 40513     | 12331     | 171737    | 299451.6  | 7.39      |
| 80-85      | 80       | 5        | 0.5       | 135644     | 26002        | 0.191691  | 0.647942  | 0.352058  | 28182     | 18260     | 95259     | 127714.9  | 4.53      |
| 85+        | 85       | 0        | 0.5       | 67822      | 20733        | 0.3057    | 1         | 0         | 9922      | 9922      | 32456     | 32455.64  | 3.27      |
| All ages   |          |          |           | 33740466   | 321738       |           |           |           |           |           |           |           |           |

**KARNATAKA**

Estimated abridged life table for 2019

**FEMALES**

| <i>Age</i> | <i>x</i> | <i>n</i> | <i>ax</i> | <i>pop</i> | <i>death</i> | <i>Mx</i> | <i>qx</i> | <i>px</i> | <i>lx</i> | <i>dx</i> | <i>Lx</i> | <i>Tx</i> | <i>ex</i> |
|------------|----------|----------|-----------|------------|--------------|-----------|-----------|-----------|-----------|-----------|-----------|-----------|-----------|
| <1         | 0        | 1        | 0.1       | 453000     | 10517        | 0.023216  | 0.022741  | 0.977259  | 100000    | 2274      | 97953     | 7167054   | 71.67     |
| 1-4        | 1        | 4        | 0.5       | 1782000    | 3338         | 0.001873  | 0.007466  | 0.992534  | 97726     | 730       | 389445    | 7069101   | 72.34     |
| 5-9        | 5        | 5        | 0.5       | 2398000    | 740          | 0.000309  | 0.001542  | 0.998458  | 96996     | 150       | 484608    | 6679656   | 68.87     |
| 10-14      | 10       | 5        | 0.5       | 2471000    | 2248         | 0.00091   | 0.004538  | 0.995462  | 96847     | 440       | 483135    | 6195048   | 63.97     |
| 15-19      | 15       | 5        | 0.5       | 2592000    | 1087         | 0.000419  | 0.002094  | 0.997906  | 96407     | 202       | 481532    | 5711913   | 59.25     |
| 20-24      | 20       | 5        | 0.5       | 2751000    | 3919         | 0.001425  | 0.007098  | 0.992902  | 96205     | 683       | 479320    | 5230381   | 54.37     |
| 25-29      | 25       | 5        | 0.5       | 2833000    | 3674         | 0.001297  | 0.006463  | 0.993537  | 95522     | 617       | 476069    | 4751062   | 49.74     |
| 30-34      | 30       | 5        | 0.5       | 2865000    | 3674         | 0.001282  | 0.006391  | 0.993609  | 94905     | 607       | 473009    | 4274993   | 45.04     |
| 35-39      | 35       | 5        | 0.5       | 2725000    | 4626         | 0.001697  | 0.008451  | 0.991549  | 94299     | 797       | 469500    | 3801984   | 40.32     |
| 40-44      | 40       | 5        | 0.5       | 2436000    | 6611         | 0.002714  | 0.013479  | 0.986521  | 93502     | 1260      | 464357    | 3332483   | 35.64     |
| 45-49      | 45       | 5        | 0.5       | 2180000    | 7959         | 0.003651  | 0.01809   | 0.98191   | 92241     | 1669      | 457035    | 2868126   | 31.09     |
| 50-54      | 50       | 5        | 0.5       | 1880000    | 11894        | 0.006326  | 0.03114   | 0.96886   | 90573     | 2820      | 445812    | 2411092   | 26.62     |
| 55-59      | 55       | 5        | 0.5       | 1561000    | 12061        | 0.007726  | 0.037899  | 0.962101  | 87752     | 3326      | 430447    | 1965279   | 22.40     |
| 60-64      | 60       | 5        | 0.5       | 1238000    | 19002        | 0.015349  | 0.073911  | 0.926089  | 84427     | 6240      | 406533    | 1534832   | 18.18     |
| 65-69      | 65       | 5        | 0.5       | 970000     | 24150        | 0.024897  | 0.11719   | 0.88281   | 78187     | 9163      | 368026    | 1128300   | 14.43     |
| 70-74      | 70       | 5        | 0.5       | 779000     | 38405        | 0.0493    | 0.219452  | 0.780548  | 69024     | 15147     | 307250    | 760274.1  | 11.01     |
| 75-79      | 75       | 5        | 0.5       | 535000     | 36862        | 0.0689    | 0.293879  | 0.706121  | 53876     | 15833     | 229799    | 453023.6  | 8.41      |
| 80-85      | 80       | 5        | 0.5       | 164670     | 21564        | 0.130953  | 0.493275  | 0.506725  | 38043     | 18766     | 143302    | 223224.7  | 5.87      |
| 85+        | 85       | 0        | 0.5       | 65868      | 15887        | 0.2412    | 1         | 0         | 19277     | 19277     | 79923     | 79923.03  | 4.15      |
| All ages   |          |          |           | 32679538   | 228218       |           |           |           |           |           |           |           |           |



## KERALA

Estimated abridged life table for 2019

## MALES

| Age      | <i>x</i> | <i>n</i> | <i>ax</i> | <i>pop</i> | <i>death</i> | <i>Mx</i> | <i>qx</i> | <i>px</i> | <i>lx</i> | <i>dx</i> | <i>Lx</i> | <i>Tx</i> | <i>ex</i> |
|----------|----------|----------|-----------|------------|--------------|-----------|-----------|-----------|-----------|-----------|-----------|-----------|-----------|
| <1       | 0        | 1        | 0.1       | 237000     | 2163         | 0.009125  | 0.00905   | 0.99095   | 100000    | 905       | 99185     | 7220167   | 72.20     |
| 1-4      | 1        | 4        | 0.5       | 944000     | 500          | 0.00053   | 0.002116  | 0.997884  | 99095     | 210       | 395960    | 7120982   | 71.86     |
| 5-9      | 5        | 5        | 0.5       | 1234000    | 129          | 0.000104  | 0.000521  | 0.999479  | 98885     | 51        | 494298    | 6725021   | 68.01     |
| 10-14    | 10       | 5        | 0.5       | 1283000    | 437          | 0.000341  | 0.001703  | 0.998297  | 98834     | 168       | 493748    | 6230724   | 63.04     |
| 15-19    | 15       | 5        | 0.5       | 1316000    | 1122         | 0.000852  | 0.004253  | 0.995747  | 98665     | 420       | 492278    | 5736976   | 58.15     |
| 20-24    | 20       | 5        | 0.5       | 1363000    | 1252         | 0.000918  | 0.004582  | 0.995418  | 98246     | 450       | 490104    | 5244698   | 53.38     |
| 25-29    | 25       | 5        | 0.5       | 1329000    | 1990         | 0.001498  | 0.00746   | 0.99254   | 97796     | 730       | 487155    | 4754594   | 48.62     |
| 30-34    | 30       | 5        | 0.5       | 1261000    | 1327         | 0.001052  | 0.005247  | 0.994753  | 97066     | 509       | 484058    | 4267439   | 43.96     |
| 35-39    | 35       | 5        | 0.5       | 1186000    | 2227         | 0.001878  | 0.009346  | 0.990654  | 96557     | 902       | 480528    | 3783382   | 39.18     |
| 40-44    | 40       | 5        | 0.5       | 1127000    | 4099         | 0.003637  | 0.018024  | 0.981976  | 95654     | 1724      | 473962    | 3302853   | 34.53     |
| 45-49    | 45       | 5        | 0.5       | 1102000    | 5729         | 0.005199  | 0.025662  | 0.974338  | 93930     | 2410      | 463626    | 2828891   | 30.12     |
| 50-54    | 50       | 5        | 0.5       | 1067000    | 9173         | 0.008597  | 0.042082  | 0.957918  | 91520     | 3851      | 447972    | 2365265   | 25.84     |
| 55-59    | 55       | 5        | 0.5       | 983000     | 10410        | 0.01059   | 0.051584  | 0.948416  | 87669     | 4522      | 427038    | 1917293   | 21.87     |
| 60-64    | 60       | 5        | 0.5       | 849000     | 17875        | 0.021054  | 0.100005  | 0.899995  | 83146     | 8315      | 394944    | 1490256   | 17.92     |
| 65-69    | 65       | 5        | 0.5       | 696000     | 20099        | 0.028878  | 0.134669  | 0.865331  | 74831     | 10077     | 348963    | 1095312   | 14.64     |
| 70-74    | 70       | 5        | 0.5       | 505000     | 19004        | 0.037632  | 0.171978  | 0.828022  | 64754     | 11136     | 295929    | 746348.4  | 11.53     |
| 75-79    | 75       | 5        | 0.5       | 305000     | 17592        | 0.057678  | 0.252047  | 0.747953  | 53618     | 13514     | 234303    | 450419.5  | 8.40      |
| 80-85    | 80       | 5        | 0.5       | 119301     | 15601        | 0.130769  | 0.492754  | 0.507246  | 40103     | 19761     | 151115    | 216116.7  | 5.39      |
| 85+      | 85       | 0        | 0.5       | 68172      | 21334        | 0.312949  | 1         | 0         | 20342     | 20342     | 65002     | 65002.15  | 3.20      |
| All ages |          |          |           | 16974473   | 152063       |           |           |           |           |           |           |           |           |

**KERALA**

Estimated abridged life table for 2019

**FEMALES**

| <i>Age</i> | <i>x</i> | <i>n</i> | <i>ax</i> | <i>pop</i> | <i>death</i> | <i>Mx</i> | <i>qx</i> | <i>px</i> | <i>lx</i> | <i>dx</i> | <i>Lx</i> | <i>Tx</i> | <i>ex</i> |
|------------|----------|----------|-----------|------------|--------------|-----------|-----------|-----------|-----------|-----------|-----------|-----------|-----------|
| <1         | 0        | 1        | 0.1       | 227000     | 1686         | 0.007426  | 0.007376  | 0.992624  | 100000    | 738       | 99336     | 7829671   | 78.30     |
| 1-4        | 1        | 4        | 0.5       | 907000     | 395          | 0.000436  | 0.001741  | 0.998259  | 99262     | 173       | 396704    | 7730335   | 77.88     |
| 5-9        | 5        | 5        | 0.5       | 1182000    | 182          | 0.000154  | 0.00077   | 0.99923   | 99090     | 76        | 495257    | 7333632   | 74.01     |
| 10-14      | 10       | 5        | 0.5       | 1233000    | 201          | 0.000163  | 0.000817  | 0.999183  | 99013     | 81        | 494864    | 6838375   | 69.07     |
| 15-19      | 15       | 5        | 0.5       | 1255000    | 159          | 0.000127  | 0.000633  | 0.999367  | 98932     | 63        | 494505    | 6343511   | 64.12     |
| 20-24      | 20       | 5        | 0.5       | 1284000    | 807          | 0.000628  | 0.003136  | 0.996864  | 98870     | 310       | 493574    | 5849005   | 59.16     |
| 25-29      | 25       | 5        | 0.5       | 1292000    | 282          | 0.000218  | 0.001089  | 0.998911  | 98560     | 107       | 492530    | 5355432   | 54.34     |
| 30-34      | 30       | 5        | 0.5       | 1337000    | 985          | 0.000737  | 0.003678  | 0.996322  | 98452     | 362       | 491356    | 4862902   | 49.39     |
| 35-39      | 35       | 5        | 0.5       | 1358000    | 1259         | 0.000927  | 0.004626  | 0.995374  | 98090     | 454       | 489316    | 4371546   | 44.57     |
| 40-44      | 40       | 5        | 0.5       | 1352000    | 1363         | 0.001008  | 0.005027  | 0.994973  | 97636     | 491       | 486955    | 3882229   | 39.76     |
| 45-49      | 45       | 5        | 0.5       | 1343000    | 2694         | 0.002006  | 0.009981  | 0.990019  | 97146     | 970       | 483304    | 3395274   | 34.95     |
| 50-54      | 50       | 5        | 0.5       | 1282000    | 3893         | 0.003037  | 0.015069  | 0.984931  | 96176     | 1449      | 477257    | 2911970   | 30.28     |
| 55-59      | 55       | 5        | 0.5       | 1153000    | 6016         | 0.005218  | 0.025755  | 0.974245  | 94727     | 2440      | 467534    | 2434714   | 25.70     |
| 60-64      | 60       | 5        | 0.5       | 974000     | 8131         | 0.008349  | 0.040889  | 0.959111  | 92287     | 3774      | 452001    | 1967179   | 21.32     |
| 65-69      | 65       | 5        | 0.5       | 795000     | 11999        | 0.015093  | 0.072723  | 0.927277  | 88514     | 6437      | 426475    | 1515178   | 17.12     |
| 70-74      | 70       | 5        | 0.5       | 617000     | 12795        | 0.020738  | 0.098577  | 0.901423  | 82077     | 8091      | 390156    | 1088702   | 13.26     |
| 75-79      | 75       | 5        | 0.5       | 424000     | 17766        | 0.041901  | 0.189639  | 0.810361  | 73986     | 14031     | 334852    | 698546.7  | 9.44      |
| 80-85      | 80       | 5        | 0.5       | 184470     | 18946        | 0.102706  | 0.408613  | 0.591387  | 59955     | 24498     | 238530    | 363694.5  | 6.07      |
| 85+        | 85       | 0        | 0.5       | 129129     | 36580        | 0.28328   | 1         | 0         | 35457     | 35457     | 125165    | 125164.9  | 3.53      |
| All ages   |          |          |           | 18328599   | 126140       |           |           |           |           |           |           |           |           |

**MAHARASHTRA**

Estimated abridged life table for 2019

**MALES**

| <i>Age</i> | <i>x</i> | <i>n</i> | <i>ax</i> | <i>pop</i> | <i>death</i> | <i>Mx</i> | <i>qx</i> | <i>px</i> | <i>lx</i> | <i>dx</i> | <i>Lx</i> | <i>Tx</i> | <i>ex</i> |
|------------|----------|----------|-----------|------------|--------------|-----------|-----------|-----------|-----------|-----------|-----------|-----------|-----------|
| <1         | 0        | 1        | 0.1       | 905000     | 15439        | 0.017059  | 0.016802  | 0.983198  | 100000    | 1680      | 98488     | 7147531   | 71.48     |
| 1-4        | 1        | 4        | 0.5       | 3593000    | 3845         | 0.00107   | 0.004272  | 0.995728  | 98320     | 420       | 392439    | 7049043   | 71.70     |
| 5-9        | 5        | 5        | 0.5       | 4726000    | 1671         | 0.000354  | 0.001767  | 0.998233  | 97900     | 173       | 489067    | 6656603   | 67.99     |
| 10-14      | 10       | 5        | 0.5       | 5124000    | 3669         | 0.000716  | 0.003574  | 0.996426  | 97727     | 349       | 487761    | 6167536   | 63.11     |
| 15-19      | 15       | 5        | 0.5       | 5424000    | 5356         | 0.000987  | 0.004925  | 0.995075  | 97378     | 480       | 485689    | 5679775   | 58.33     |
| 20-24      | 20       | 5        | 0.5       | 5813000    | 6312         | 0.001086  | 0.005415  | 0.994585  | 96898     | 525       | 483179    | 5194086   | 53.60     |
| 25-29      | 25       | 5        | 0.5       | 5953000    | 8532         | 0.001433  | 0.007141  | 0.992859  | 96373     | 688       | 480147    | 4710907   | 48.88     |
| 30-34      | 30       | 5        | 0.5       | 5778000    | 13775        | 0.002384  | 0.01185   | 0.98815   | 95685     | 1134      | 475591    | 4230760   | 44.22     |
| 35-39      | 35       | 5        | 0.5       | 5259000    | 12690        | 0.002413  | 0.011993  | 0.988007  | 94551     | 1134      | 469922    | 3755169   | 39.72     |
| 40-44      | 40       | 5        | 0.5       | 4592000    | 15662        | 0.003411  | 0.01691   | 0.98309   | 93417     | 1580      | 463138    | 3285247   | 35.17     |
| 45-49      | 45       | 5        | 0.5       | 4077000    | 18603        | 0.004563  | 0.022557  | 0.977443  | 91838     | 2072      | 454010    | 2822109   | 30.73     |
| 50-54      | 50       | 5        | 0.5       | 3546000    | 28074        | 0.007917  | 0.038818  | 0.961182  | 89766     | 3485      | 440119    | 2368099   | 26.38     |
| 55-59      | 55       | 5        | 0.5       | 2913000    | 30612        | 0.010509  | 0.051198  | 0.948802  | 86282     | 4417      | 420365    | 1927980   | 22.35     |
| 60-64      | 60       | 5        | 0.5       | 2275000    | 47996        | 0.021097  | 0.1002    | 0.8998    | 81864     | 8203      | 388814    | 1507615   | 18.42     |
| 65-69      | 65       | 5        | 0.5       | 1710000    | 56443        | 0.033008  | 0.152458  | 0.847542  | 73661     | 11230     | 340231    | 1118801   | 15.19     |
| 70-74      | 70       | 5        | 0.5       | 1290000    | 54955        | 0.0426    | 0.192501  | 0.807499  | 62431     | 12018     | 282111    | 778569.9  | 12.47     |
| 75-79      | 75       | 5        | 0.5       | 910000     | 51371        | 0.056452  | 0.247352  | 0.752648  | 50413     | 12470     | 220891    | 496459.3  | 9.85      |
| 80-85      | 80       | 5        | 0.5       | 323510     | 42514        | 0.131416  | 0.494587  | 0.505413  | 37943     | 18766     | 142801    | 275568.3  | 7.26      |
| 85+        | 85       | 0        | 0.5       | 194106     | 28037        | 0.144441  | 1         | 0         | 19177     | 19177     | 132767    | 132767.3  | 6.92      |
| All ages   |          |          |           | 64405616   | 445557       |           |           |           |           |           |           |           |           |

**MAHARASHTRA**

Estimated abridged life table for 2019

**FEMALES**

| <i>Age</i> | <i>x</i> | <i>n</i> | <i>ax</i> | <i>pop</i> | <i>death</i> | <i>Mx</i> | <i>qx</i> | <i>px</i> | <i>lx</i> | <i>dx</i> | <i>Lx</i> | <i>Tx</i> | <i>ex</i> |
|------------|----------|----------|-----------|------------|--------------|-----------|-----------|-----------|-----------|-----------|-----------|-----------|-----------|
| <1         | 0        | 1        | 0.1       | 795000     | 14906        | 0.01875   | 0.018439  | 0.981561  | 100000    | 1844      | 98340     | 7456178   | 74.56     |
| 1-4        | 1        | 4        | 0.5       | 3151000    | 3719         | 0.00118   | 0.004711  | 0.995289  | 98156     | 462       | 391700    | 7357837   | 74.96     |
| 5-9        | 5        | 5        | 0.5       | 4076000    | 980          | 0.00024   | 0.001201  | 0.998799  | 97694     | 117       | 488175    | 6966138   | 71.31     |
| 10-14      | 10       | 5        | 0.5       | 4569000    | 2739         | 0.0006    | 0.002993  | 0.997007  | 97576     | 292       | 487152    | 6477963   | 66.39     |
| 15-19      | 15       | 5        | 0.5       | 4818000    | 5030         | 0.001044  | 0.005206  | 0.994794  | 97284     | 507       | 485155    | 5990811   | 61.58     |
| 20-24      | 20       | 5        | 0.5       | 5200000    | 4647         | 0.000894  | 0.004459  | 0.995541  | 96778     | 431       | 482810    | 5505655   | 56.89     |
| 25-29      | 25       | 5        | 0.5       | 5252000    | 11677        | 0.002223  | 0.011056  | 0.988944  | 96346     | 1065      | 479069    | 5022845   | 52.13     |
| 30-34      | 30       | 5        | 0.5       | 5116000    | 8889         | 0.001738  | 0.00865   | 0.99135   | 95281     | 824       | 474345    | 4543776   | 47.69     |
| 35-39      | 35       | 5        | 0.5       | 4808000    | 5923         | 0.001232  | 0.00614   | 0.99386   | 94457     | 580       | 470835    | 4069431   | 43.08     |
| 40-44      | 40       | 5        | 0.5       | 4326000    | 10672        | 0.002467  | 0.012259  | 0.987741  | 93877     | 1151      | 466508    | 3598596   | 38.33     |
| 45-49      | 45       | 5        | 0.5       | 3894000    | 15291        | 0.003927  | 0.019443  | 0.980557  | 92726     | 1803      | 459123    | 3132089   | 33.78     |
| 50-54      | 50       | 5        | 0.5       | 3386000    | 18137        | 0.005356  | 0.026429  | 0.973571  | 90923     | 2403      | 448608    | 2672966   | 29.40     |
| 55-59      | 55       | 5        | 0.5       | 2795000    | 21154        | 0.007569  | 0.037141  | 0.962859  | 88520     | 3288      | 434382    | 2224357   | 25.13     |
| 60-64      | 60       | 5        | 0.5       | 2215000    | 30828        | 0.013918  | 0.067249  | 0.932751  | 85233     | 5732      | 411833    | 1789975   | 21.00     |
| 65-69      | 65       | 5        | 0.5       | 1777000    | 46735        | 0.0263    | 0.123387  | 0.876613  | 79501     | 9809      | 372980    | 1378142   | 17.33     |
| 70-74      | 70       | 5        | 0.5       | 1484000    | 43333        | 0.0292    | 0.136067  | 0.863933  | 69691     | 9483      | 324750    | 1005162   | 14.42     |
| 75-79      | 75       | 5        | 0.5       | 1098000    | 53912        | 0.0491    | 0.21866   | 0.78134   | 60209     | 13165     | 268130    | 680412.3  | 11.30     |
| 80-85      | 80       | 5        | 0.5       | 298675     | 24073        | 0.0806    | 0.335414  | 0.664586  | 47043     | 15779     | 195770    | 412282.1  | 8.76      |
| 85+        | 85       | 0        | 0.5       | 238940     | 34503        | 0.1444    | 1         | 0         | 31264     | 31264     | 216513    | 216512.5  | 6.93      |
| All ages   |          |          |           | 59297615   | 357150       |           |           |           |           |           |           |           |           |

**MANIPUR**

Estimated abridged life table for 2019

**MALES**

| <i>Age</i> | <i>x</i> | <i>n</i> | <i>ax</i> | <i>pop</i> | <i>death</i> | <i>Mx</i> | <i>qx</i> | <i>px</i> | <i>lx</i> | <i>dx</i> | <i>Lx</i> | <i>Tx</i> | <i>ex</i> |
|------------|----------|----------|-----------|------------|--------------|-----------|-----------|-----------|-----------|-----------|-----------|-----------|-----------|
| <1         | 0        | 1        | 0.1       | 28108      | 627          | 0.022305  | 0.021866  | 0.978134  | 100000    | 2187      | 98032     | 6654085   | 66.54     |
| 1-4        | 1        | 4        | 0.5       | 111355     | 233          | 0.00209   | 0.008327  | 0.991673  | 97813     | 815       | 389625    | 6556053   | 67.03     |
| 5-9        | 5        | 5        | 0.5       | 142597     | 93           | 0.000655  | 0.003271  | 0.996729  | 96999     | 317       | 484201    | 6166428   | 63.57     |
| 10-14      | 10       | 5        | 0.5       | 156700     | 92           | 0.000588  | 0.002936  | 0.997064  | 96682     | 284       | 482698    | 5682227   | 58.77     |
| 15-19      | 15       | 5        | 0.5       | 153566     | 225          | 0.001466  | 0.007303  | 0.992697  | 96398     | 704       | 480228    | 5199529   | 53.94     |
| 20-24      | 20       | 5        | 0.5       | 158267     | 334          | 0.002111  | 0.010497  | 0.989503  | 95694     | 1005      | 475957    | 4719301   | 49.32     |
| 25-29      | 25       | 5        | 0.5       | 148865     | 330          | 0.002219  | 0.011033  | 0.988967  | 94689     | 1045      | 470834    | 4243344   | 44.81     |
| 30-34      | 30       | 5        | 0.5       | 136329     | 361          | 0.002649  | 0.013158  | 0.986842  | 93644     | 1232      | 465142    | 3772510   | 40.29     |
| 35-39      | 35       | 5        | 0.5       | 115958     | 410          | 0.003534  | 0.017515  | 0.982485  | 92412     | 1619      | 458015    | 3307368   | 35.79     |
| 40-44      | 40       | 5        | 0.5       | 103422     | 529          | 0.005117  | 0.025262  | 0.974738  | 90794     | 2294      | 448234    | 2849353   | 31.38     |
| 45-49      | 45       | 5        | 0.5       | 86185      | 660          | 0.007656  | 0.037561  | 0.962439  | 88500     | 3324      | 434190    | 2401118   | 27.13     |
| 50-54      | 50       | 5        | 0.5       | 67381      | 783          | 0.01162   | 0.056459  | 0.943541  | 85176     | 4809      | 413857    | 1966928   | 23.09     |
| 55-59      | 55       | 5        | 0.5       | 51711      | 908          | 0.017561  | 0.084112  | 0.915888  | 80367     | 6760      | 384935    | 1553071   | 19.32     |
| 60-64      | 60       | 5        | 0.5       | 39175      | 1040         | 0.026539  | 0.124439  | 0.875561  | 73607     | 9160      | 345136    | 1168136   | 15.87     |
| 65-69      | 65       | 5        | 0.5       | 28206      | 1123         | 0.039809  | 0.181028  | 0.818972  | 64447     | 11667     | 293070    | 822999.6  | 12.77     |
| 70-74      | 70       | 5        | 0.5       | 18804      | 1145         | 0.060867  | 0.264142  | 0.735858  | 52781     | 13942     | 229049    | 529929.2  | 10.04     |
| 75-79      | 75       | 5        | 0.5       | 10969      | 1017         | 0.092752  | 0.376465  | 0.623535  | 38839     | 14622     | 157642    | 300879.8  | 7.75      |
| 80-85      | 80       | 5        | 0.5       | 6268       | 895          | 0.142745  | 0.526011  | 0.473989  | 24218     | 12739     | 89241     | 143238.3  | 5.91      |
| 85+        | 85       | 0        | 0.5       | 3134       | 666          | 0.212581  | 1         | 0         | 11479     | 11479     | 53997     | 53997.39  | 4.70      |
| All ages   |          |          |           | 1567000    | 11471        |           |           |           |           |           |           |           |           |

**MANIPUR**

Estimated abridged life table for 2019

**FEMALES**

| <i>Age</i> | <i>x</i> | <i>n</i> | <i>ax</i> | <i>pop</i> | <i>death</i> | <i>Mx</i> | <i>qx</i> | <i>px</i> | <i>lx</i> | <i>dx</i> | <i>Lx</i> | <i>Tx</i> | <i>ex</i> |
|------------|----------|----------|-----------|------------|--------------|-----------|-----------|-----------|-----------|-----------|-----------|-----------|-----------|
| <1         | 0        | 1        | 0.1       | 26387      | 580          | 0.021978  | 0.021552  | 0.978448  | 100000    | 2155      | 98060     | 7279564   | 72.80     |
| 1-4        | 1        | 4        | 0.5       | 104505     | 227          | 0.002173  | 0.008655  | 0.991345  | 97845     | 847       | 389686    | 7181503   | 73.40     |
| 5-9        | 5        | 5        | 0.5       | 135458     | 72           | 0.000533  | 0.00266   | 0.99734   | 96998     | 258       | 484345    | 6791818   | 70.02     |
| 10-14      | 10       | 5        | 0.5       | 147634     | 62           | 0.000418  | 0.002087  | 0.997913  | 96740     | 202       | 483195    | 6307472   | 65.20     |
| 15-19      | 15       | 5        | 0.5       | 153722     | 106          | 0.000691  | 0.00345   | 0.99655   | 96538     | 333       | 481858    | 5824277   | 60.33     |
| 20-24      | 20       | 5        | 0.5       | 175030     | 149          | 0.000853  | 0.004255  | 0.995745  | 96205     | 409       | 480002    | 5342420   | 55.53     |
| 25-29      | 25       | 5        | 0.5       | 158288     | 158          | 0.000996  | 0.004967  | 0.995033  | 95796     | 476       | 477789    | 4862418   | 50.76     |
| 30-34      | 30       | 5        | 0.5       | 138502     | 178          | 0.001286  | 0.006407  | 0.993593  | 95320     | 611       | 475072    | 4384629   | 46.00     |
| 35-39      | 35       | 5        | 0.5       | 112628     | 203          | 0.0018    | 0.008959  | 0.991041  | 94709     | 849       | 471424    | 3909557   | 41.28     |
| 40-44      | 40       | 5        | 0.5       | 92842      | 243          | 0.002621  | 0.01302   | 0.98698   | 93861     | 1222      | 466248    | 3438133   | 36.63     |
| 45-49      | 45       | 5        | 0.5       | 74578      | 292          | 0.003911  | 0.019367  | 0.980633  | 92639     | 1794      | 458707    | 2971885   | 32.08     |
| 50-54      | 50       | 5        | 0.5       | 56314      | 330          | 0.005865  | 0.028901  | 0.971099  | 90844     | 2625      | 447658    | 2513178   | 27.66     |
| 55-59      | 55       | 5        | 0.5       | 53270      | 472          | 0.008854  | 0.043313  | 0.956687  | 88219     | 3821      | 431542    | 2065520   | 23.41     |
| 60-64      | 60       | 5        | 0.5       | 35006      | 484          | 0.01383   | 0.06684   | 0.93316   | 84398     | 5641      | 407886    | 1633978   | 19.36     |
| 65-69      | 65       | 5        | 0.5       | 24352      | 553          | 0.022714  | 0.107469  | 0.892531  | 78757     | 8464      | 372624    | 1226092   | 15.57     |
| 70-74      | 70       | 5        | 0.5       | 15220      | 594          | 0.039041  | 0.177848  | 0.822152  | 70293     | 12501     | 320210    | 853468.2  | 12.14     |
| 75-79      | 75       | 5        | 0.5       | 10654      | 715          | 0.067067  | 0.287182  | 0.712818  | 57791     | 16597     | 247465    | 533257.9  | 9.23      |
| 80-85      | 80       | 5        | 0.5       | 4566       | 519          | 0.113732  | 0.442769  | 0.557231  | 41195     | 18240     | 160374    | 285792.6  | 6.94      |
| 85+        | 85       | 0        | 0.5       | 3044       | 557          | 0.183027  | 1         | 0         | 22955     | 22955     | 125418    | 125418.4  | 5.46      |
| All ages   |          |          |           | 1522000    | 6494         |           |           |           |           |           |           |           |           |

**MEGHALAYA**

Estimated abridged life table for 2019

**MALES**

| <i>Age</i> | <i>x</i> | <i>n</i> | <i>ax</i> | <i>pop</i> | <i>death</i> | <i>Mx</i> | <i>qx</i> | <i>px</i> | <i>lx</i> | <i>dx</i> | <i>Lx</i> | <i>Tx</i> | <i>ex</i> |
|------------|----------|----------|-----------|------------|--------------|-----------|-----------|-----------|-----------|-----------|-----------|-----------|-----------|
| <1         | 0        | 1        | 0.1       | 29148      | 920          | 0.031568  | 0.030696  | 0.969304  | 100000    | 3070      | 97237     | 6464700   | 64.65     |
| 1-4        | 1        | 4        | 0.5       | 115477     | 278          | 0.002411  | 0.009598  | 0.990402  | 96930     | 930       | 385861    | 6367463   | 65.69     |
| 5-9        | 5        | 5        | 0.5       | 147875     | 212          | 0.001431  | 0.007131  | 0.992869  | 96000     | 685       | 478289    | 5981602   | 62.31     |
| 10-14      | 10       | 5        | 0.5       | 162500     | 259          | 0.001592  | 0.007928  | 0.992072  | 95315     | 756       | 474688    | 5503313   | 57.74     |
| 15-19      | 15       | 5        | 0.5       | 159250     | 257          | 0.001616  | 0.008048  | 0.991952  | 94560     | 761       | 470896    | 5028625   | 53.18     |
| 20-24      | 20       | 5        | 0.5       | 164125     | 315          | 0.001916  | 0.009537  | 0.990463  | 93799     | 895       | 466758    | 4557728   | 48.59     |
| 25-29      | 25       | 5        | 0.5       | 154375     | 461          | 0.002987  | 0.014823  | 0.985177  | 92904     | 1377      | 461078    | 4090971   | 44.03     |
| 30-34      | 30       | 5        | 0.5       | 141375     | 564          | 0.003986  | 0.019734  | 0.980266  | 91527     | 1806      | 453120    | 3629892   | 39.66     |
| 35-39      | 35       | 5        | 0.5       | 120250     | 642          | 0.005339  | 0.026342  | 0.973658  | 89721     | 2363      | 442696    | 3176772   | 35.41     |
| 40-44      | 40       | 5        | 0.5       | 107250     | 785          | 0.007316  | 0.035923  | 0.964077  | 87357     | 3138      | 428942    | 2734077   | 31.30     |
| 45-49      | 45       | 5        | 0.5       | 89375      | 752          | 0.008409  | 0.041179  | 0.958821  | 84219     | 3468      | 412426    | 2305135   | 27.37     |
| 50-54      | 50       | 5        | 0.5       | 69875      | 919          | 0.013146  | 0.063637  | 0.936363  | 80751     | 5139      | 390909    | 1892708   | 23.44     |
| 55-59      | 55       | 5        | 0.5       | 53625      | 708          | 0.013198  | 0.06388   | 0.93612   | 75613     | 4830      | 365987    | 1501799   | 19.86     |
| 60-64      | 60       | 5        | 0.5       | 40625      | 865          | 0.021292  | 0.10108   | 0.89892   | 70782     | 7155      | 336025    | 1135811   | 16.05     |
| 65-69      | 65       | 5        | 0.5       | 29250      | 1201         | 0.04105   | 0.186145  | 0.813855  | 63628     | 11844     | 288529    | 799786.1  | 12.57     |
| 70-74      | 70       | 5        | 0.5       | 19500      | 1222         | 0.062675  | 0.270925  | 0.729075  | 51784     | 14030     | 223845    | 511257.4  | 9.87      |
| 75-79      | 75       | 5        | 0.5       | 11375      | 1084         | 0.095317  | 0.384871  | 0.615129  | 37754     | 14531     | 152445    | 287412.4  | 7.61      |
| 80-85      | 80       | 5        | 0.5       | 6500       | 949          | 0.14601   | 0.534826  | 0.465174  | 23224     | 12421     | 85067     | 134967.4  | 5.81      |
| 85+        | 85       | 0        | 0.5       | 3250       | 704          | 0.216493  | 1         | 0         | 10803     | 10803     | 49900     | 49900.44  | 4.62      |
| All ages   |          |          |           | 1625000    | 13095        |           |           |           |           |           |           |           |           |

**MEGHALAYA**

Estimated abridged life table for 2019

**FEMALES**

| <i>Age</i> | <i>x</i> | <i>n</i> | <i>ax</i> | <i>pop</i> | <i>death</i> | <i>Mx</i> | <i>qx</i> | <i>px</i> | <i>lx</i> | <i>dx</i> | <i>Lx</i> | <i>Tx</i> | <i>ex</i> |
|------------|----------|----------|-----------|------------|--------------|-----------|-----------|-----------|-----------|-----------|-----------|-----------|-----------|
| <1         | 0        | 1        | 0.1       | 27999      | 911          | 0.032535  | 0.03161   | 0.96839   | 100000    | 3161      | 97155     | 7029193   | 70.29     |
| 1-4        | 1        | 4        | 0.5       | 110891     | 244          | 0.002202  | 0.00877   | 0.99123   | 96839     | 849       | 385658    | 6932038   | 71.58     |
| 5-9        | 5        | 5        | 0.5       | 143735     | 152          | 0.001057  | 0.005272  | 0.994728  | 95990     | 506       | 478684    | 6546380   | 68.20     |
| 10-14      | 10       | 5        | 0.5       | 156655     | 186          | 0.001186  | 0.00591   | 0.99409   | 95484     | 564       | 476008    | 6067697   | 63.55     |
| 15-19      | 15       | 5        | 0.5       | 163115     | 188          | 0.001154  | 0.005752  | 0.994248  | 94919     | 546       | 473232    | 5591689   | 58.91     |
| 20-24      | 20       | 5        | 0.5       | 185725     | 230          | 0.001238  | 0.006173  | 0.993827  | 94373     | 583       | 470411    | 5118457   | 54.24     |
| 25-29      | 25       | 5        | 0.5       | 167960     | 243          | 0.001448  | 0.007214  | 0.992786  | 93791     | 677       | 467263    | 4648046   | 49.56     |
| 30-34      | 30       | 5        | 0.5       | 146965     | 297          | 0.002023  | 0.010063  | 0.989937  | 93114     | 937       | 463229    | 4180784   | 44.90     |
| 35-39      | 35       | 5        | 0.5       | 119510     | 304          | 0.002547  | 0.012654  | 0.987346  | 92177     | 1166      | 457970    | 3717555   | 40.33     |
| 40-44      | 40       | 5        | 0.5       | 98515      | 372          | 0.003776  | 0.018705  | 0.981295  | 91011     | 1702      | 450798    | 3259585   | 35.82     |
| 45-49      | 45       | 5        | 0.5       | 79135      | 379          | 0.004786  | 0.023645  | 0.976355  | 89308     | 2112      | 441263    | 2808786   | 31.45     |
| 50-54      | 50       | 5        | 0.5       | 59755      | 463          | 0.007746  | 0.037995  | 0.962005  | 87197     | 3313      | 427701    | 2367523   | 27.15     |
| 55-59      | 55       | 5        | 0.5       | 56525      | 392          | 0.006941  | 0.034114  | 0.965886  | 83884     | 2862      | 412265    | 1939822   | 23.13     |
| 60-64      | 60       | 5        | 0.5       | 37145      | 480          | 0.01291   | 0.062532  | 0.937468  | 81022     | 5066      | 392444    | 1527557   | 18.85     |
| 65-69      | 65       | 5        | 0.5       | 25840      | 658          | 0.025468  | 0.119718  | 0.880282  | 75956     | 9093      | 357045    | 1135113   | 14.94     |
| 70-74      | 70       | 5        | 0.5       | 16150      | 697          | 0.043167  | 0.194813  | 0.805187  | 66862     | 13026     | 301748    | 778067.9  | 11.64     |
| 75-79      | 75       | 5        | 0.5       | 11305      | 822          | 0.072747  | 0.307762  | 0.692238  | 53837     | 16569     | 227761    | 476320.3  | 8.85      |
| 80-85      | 80       | 5        | 0.5       | 4845       | 583          | 0.12042   | 0.46278   | 0.53722   | 37268     | 17247     | 143222    | 248559    | 6.67      |
| 85+        | 85       | 0        | 0.5       | 3230       | 614          | 0.190067  | 1         | 0         | 20021     | 20021     | 105337    | 105336.9  | 5.26      |
| All ages   |          |          |           | 1615000    | 8216         |           |           |           |           |           |           |           |           |



**MIZORAM**

Estimated abridged life table for 2019

**MALES**

| <i>Age</i> | <i>x</i> | <i>n</i> | <i>ax</i> | <i>pop</i> | <i>death</i> | <i>Mx</i> | <i>qx</i> | <i>px</i> | <i>lx</i> | <i>dx</i> | <i>Lx</i> | <i>Tx</i> | <i>ex</i> |
|------------|----------|----------|-----------|------------|--------------|-----------|-----------|-----------|-----------|-----------|-----------|-----------|-----------|
| <1         | 0        | 1        | 0.1       | 10852      | 181          | 0.016655  | 0.016409  | 0.983591  | 100000    | 1641      | 98523     | 6618836   | 66.19     |
| 1-4        | 1        | 4        | 0.5       | 42993      | 84           | 0.001957  | 0.007797  | 0.992203  | 98359     | 767       | 391903    | 6520313   | 66.29     |
| 5-9        | 5        | 5        | 0.5       | 55055      | 31           | 0.000557  | 0.002783  | 0.997217  | 97592     | 272       | 487282    | 6128410   | 62.80     |
| 10-14      | 10       | 5        | 0.5       | 60500      | 38           | 0.00062   | 0.003095  | 0.996905  | 97321     | 301       | 485850    | 5641128   | 57.96     |
| 15-19      | 15       | 5        | 0.5       | 59290      | 79           | 0.001325  | 0.006601  | 0.993399  | 97019     | 640       | 483496    | 5155278   | 53.14     |
| 20-24      | 20       | 5        | 0.5       | 61105      | 96           | 0.001571  | 0.007823  | 0.992177  | 96379     | 754       | 480010    | 4671783   | 48.47     |
| 25-29      | 25       | 5        | 0.5       | 57475      | 192          | 0.003345  | 0.016588  | 0.983412  | 95625     | 1586      | 474159    | 4191773   | 43.84     |
| 30-34      | 30       | 5        | 0.5       | 52635      | 235          | 0.004465  | 0.022077  | 0.977923  | 94039     | 2076      | 465003    | 3717614   | 39.53     |
| 35-39      | 35       | 5        | 0.5       | 44770      | 292          | 0.006523  | 0.03209   | 0.96791   | 91963     | 2951      | 452436    | 3252611   | 35.37     |
| 40-44      | 40       | 5        | 0.5       | 39930      | 357          | 0.008938  | 0.043715  | 0.956285  | 89012     | 3891      | 435330    | 2800175   | 31.46     |
| 45-49      | 45       | 5        | 0.5       | 33275      | 285          | 0.008559  | 0.041897  | 0.958103  | 85120     | 3566      | 416687    | 2364845   | 27.78     |
| 50-54      | 50       | 5        | 0.5       | 26015      | 348          | 0.01338   | 0.064735  | 0.935265  | 81554     | 5279      | 394572    | 1948159   | 23.89     |
| 55-59      | 55       | 5        | 0.5       | 19965      | 285          | 0.014265  | 0.068867  | 0.931133  | 76275     | 5253      | 368242    | 1553586   | 20.37     |
| 60-64      | 60       | 5        | 0.5       | 15125      | 348          | 0.023014  | 0.108808  | 0.891192  | 71022     | 7728      | 335790    | 1185344   | 16.69     |
| 65-69      | 65       | 5        | 0.5       | 10890      | 366          | 0.033567  | 0.154841  | 0.845159  | 63294     | 9801      | 291970    | 849554    | 13.42     |
| 70-74      | 70       | 5        | 0.5       | 7260       | 354          | 0.048756  | 0.217294  | 0.782706  | 53494     | 11624     | 238409    | 557584.4  | 10.42     |
| 75-79      | 75       | 5        | 0.5       | 4235       | 406          | 0.09591   | 0.386804  | 0.613196  | 41870     | 16195     | 168861    | 319175.6  | 7.62      |
| 80-85      | 80       | 5        | 0.5       | 2420       | 351          | 0.145216  | 0.532691  | 0.467309  | 25674     | 13677     | 94181     | 150315    | 5.85      |
| 85+        | 85       | 0        | 0.5       | 1210       | 259          | 0.213736  | 1         | 0         | 11998     | 11998     | 56134     | 56134.22  | 4.68      |
| All ages   |          |          |           | 605000     | 4585         |           |           |           |           |           |           |           |           |

**MIZORAM**

Estimated abridged life table for 2019

**FEMALES**

| <i>Age</i> | <i>x</i> | <i>n</i> | <i>ax</i> | <i>pop</i> | <i>death</i> | <i>Mx</i> | <i>qx</i> | <i>px</i> | <i>lx</i> | <i>dx</i> | <i>Lx</i> | <i>Tx</i> | <i>ex</i> |
|------------|----------|----------|-----------|------------|--------------|-----------|-----------|-----------|-----------|-----------|-----------|-----------|-----------|
| <1         | 0        | 1        | 0.1       | 10281      | 197          | 0.019161  | 0.018836  | 0.981164  | 100000    | 1884      | 98305     | 7273498   | 72.73     |
| 1-4        | 1        | 4        | 0.5       | 40717      | 54           | 0.001324  | 0.005281  | 0.994719  | 98116     | 518       | 391429    | 7175194   | 73.13     |
| 5-9        | 5        | 5        | 0.5       | 52777      | 21           | 0.000394  | 0.001967  | 0.998033  | 97598     | 192       | 487511    | 6783765   | 69.51     |
| 10-14      | 10       | 5        | 0.5       | 57521      | 25           | 0.000442  | 0.002205  | 0.997795  | 97406     | 215       | 486494    | 6296254   | 64.64     |
| 15-19      | 15       | 5        | 0.5       | 59893      | 46           | 0.000769  | 0.00384   | 0.99616   | 97191     | 373       | 485024    | 5809760   | 59.78     |
| 20-24      | 20       | 5        | 0.5       | 68195      | 56           | 0.000826  | 0.004121  | 0.995879  | 96818     | 399       | 483094    | 5324736   | 55.00     |
| 25-29      | 25       | 5        | 0.5       | 61672      | 86           | 0.001399  | 0.006971  | 0.993029  | 96419     | 672       | 480416    | 4841642   | 50.21     |
| 30-34      | 30       | 5        | 0.5       | 53963      | 105          | 0.001954  | 0.009724  | 0.990276  | 95747     | 931       | 476408    | 4361226   | 45.55     |
| 35-39      | 35       | 5        | 0.5       | 43882      | 109          | 0.002491  | 0.01238   | 0.98762   | 94816     | 1174      | 471146    | 3884818   | 40.97     |
| 40-44      | 40       | 5        | 0.5       | 36173      | 134          | 0.003694  | 0.018301  | 0.981699  | 93642     | 1714      | 463927    | 3413673   | 36.45     |
| 45-49      | 45       | 5        | 0.5       | 29057      | 110          | 0.003794  | 0.01879   | 0.98121   | 91928     | 1727      | 455324    | 2949746   | 32.09     |
| 50-54      | 50       | 5        | 0.5       | 21941      | 135          | 0.00614   | 0.030238  | 0.969762  | 90201     | 2728      | 444187    | 2494422   | 27.65     |
| 55-59      | 55       | 5        | 0.5       | 20755      | 131          | 0.006304  | 0.031029  | 0.968971  | 87474     | 2714      | 430583    | 2050235   | 23.44     |
| 60-64      | 60       | 5        | 0.5       | 13639      | 171          | 0.01255   | 0.060841  | 0.939159  | 84759     | 5157      | 410905    | 1619653   | 19.11     |
| 65-69      | 65       | 5        | 0.5       | 9488       | 181          | 0.019046  | 0.090901  | 0.909099  | 79603     | 7236      | 379923    | 1208748   | 15.18     |
| 70-74      | 70       | 5        | 0.5       | 5930       | 332          | 0.056007  | 0.24564   | 0.75436   | 72367     | 17776     | 317392    | 828825.3  | 11.45     |
| 75-79      | 75       | 5        | 0.5       | 4151       | 272          | 0.065536  | 0.28155   | 0.71845   | 54590     | 15370     | 234527    | 511432.8  | 9.37      |
| 80-85      | 80       | 5        | 0.5       | 1779       | 198          | 0.111252  | 0.435213  | 0.564787  | 39220     | 17069     | 153429    | 276905.5  | 7.06      |
| 85+        | 85       | 0        | 0.5       | 1186       | 213          | 0.179397  | 1         | 0         | 22151     | 22151     | 123476    | 123476.2  | 5.57      |
| All ages   |          |          |           | 593000     | 2577         |           |           |           |           |           |           |           |           |

**MADHYA PRADESH**

Estimated abridged life table for 2019

**MALES**

| <i>Age</i> | <i>x</i> | <i>n</i> | <i>ax</i> | <i>pop</i> | <i>death</i> | <i>Mx</i> | <i>qx</i> | <i>px</i> | <i>lx</i> | <i>dx</i> | <i>Lx</i> | <i>Tx</i> | <i>ex</i> |
|------------|----------|----------|-----------|------------|--------------|-----------|-----------|-----------|-----------|-----------|-----------|-----------|-----------|
| <1         | 0        | 1        | 0.1       | 903000     | 37505        | 0.041534  | 0.040037  | 0.959963  | 100000    | 4004      | 96397     | 6405640   | 64.06     |
| 1-4        | 1        | 4        | 0.5       | 3482000    | 16452        | 0.004725  | 0.018723  | 0.981277  | 95996     | 1797      | 380390    | 6309243   | 65.72     |
| 5-9        | 5        | 5        | 0.5       | 4492000    | 2189         | 0.000487  | 0.002433  | 0.997567  | 94199     | 229       | 470422    | 5928852   | 62.94     |
| 10-14      | 10       | 5        | 0.5       | 3989000    | 2880         | 0.000722  | 0.003604  | 0.996396  | 93970     | 339       | 469002    | 5458431   | 58.09     |
| 15-19      | 15       | 5        | 0.5       | 4172000    | 6407         | 0.001536  | 0.00765   | 0.99235   | 93631     | 716       | 466365    | 4989429   | 53.29     |
| 20-24      | 20       | 5        | 0.5       | 4207000    | 6601         | 0.001569  | 0.007815  | 0.992185  | 92915     | 726       | 462759    | 4523064   | 48.68     |
| 25-29      | 25       | 5        | 0.5       | 3887000    | 14179        | 0.003648  | 0.018075  | 0.981925  | 92189     | 1666      | 456778    | 4060305   | 44.04     |
| 30-34      | 30       | 5        | 0.5       | 3425000    | 8752         | 0.002555  | 0.012695  | 0.987305  | 90522     | 1149      | 449739    | 3603527   | 39.81     |
| 35-39      | 35       | 5        | 0.5       | 2956000    | 14126        | 0.004779  | 0.023612  | 0.976388  | 89373     | 2110      | 441591    | 3153788   | 35.29     |
| 40-44      | 40       | 5        | 0.5       | 2599000    | 14082        | 0.005418  | 0.026729  | 0.973271  | 87263     | 2332      | 430484    | 2712197   | 31.08     |
| 45-49      | 45       | 5        | 0.5       | 2339000    | 22854        | 0.009771  | 0.047689  | 0.952311  | 84931     | 4050      | 414527    | 2281713   | 26.87     |
| 50-54      | 50       | 5        | 0.5       | 2027000    | 16244        | 0.008014  | 0.039282  | 0.960718  | 80880     | 3177      | 396458    | 1867186   | 23.09     |
| 55-59      | 55       | 5        | 0.5       | 1653000    | 29541        | 0.017871  | 0.085535  | 0.914465  | 77703     | 6646      | 371900    | 1470728   | 18.93     |
| 60-64      | 60       | 5        | 0.5       | 1243000    | 27025        | 0.021742  | 0.103106  | 0.896894  | 71057     | 7326      | 336968    | 1098828   | 15.46     |
| 65-69      | 65       | 5        | 0.5       | 884000     | 59998        | 0.067871  | 0.290126  | 0.709874  | 63730     | 18490     | 272427    | 761860.4  | 11.95     |
| 70-74      | 70       | 5        | 0.5       | 627000     | 27226        | 0.043423  | 0.195855  | 0.804145  | 45241     | 8861      | 204051    | 489433.1  | 10.82     |
| 75-79      | 75       | 5        | 0.5       | 404000     | 28632        | 0.070872  | 0.301023  | 0.698977  | 36380     | 10951     | 154522    | 285381.9  | 7.84      |
| 80-85      | 80       | 5        | 0.5       | 174436     | 26898        | 0.154197  | 0.556471  | 0.443529  | 25429     | 14150     | 91768     | 130860.2  | 5.15      |
| 85+        | 85       | 0        | 0.5       | 87218      | 25163        | 0.288506  | 1         | 0         | 11278     | 11278     | 39092     | 39092.35  | 3.47      |
| All ages   |          |          |           | 43550654   | 386756       |           |           |           |           |           |           |           |           |

**MADHYA PRADESH**

Estimated abridged life table for 2019

**FEMALES**

| <i>Age</i> | <i>x</i> | <i>n</i> | <i>ax</i> | <i>pop</i> | <i>death</i> | <i>Mx</i> | <i>qx</i> | <i>px</i> | <i>lx</i> | <i>dx</i> | <i>Lx</i> | <i>Tx</i> | <i>ex</i> |
|------------|----------|----------|-----------|------------|--------------|-----------|-----------|-----------|-----------|-----------|-----------|-----------|-----------|
| <1         | 0        | 1        | 0.1       | 835000     | 30283        | 0.036267  | 0.03512   | 0.96488   | 100000    | 3512      | 96839     | 6981709   | 69.82     |
| 1-4        | 1        | 4        | 0.5       | 3208000    | 15050        | 0.004691  | 0.018591  | 0.981409  | 96488     | 1794      | 382364    | 6884870   | 71.35     |
| 5-9        | 5        | 5        | 0.5       | 4103000    | 2059         | 0.000502  | 0.002507  | 0.997493  | 94694     | 237       | 472878    | 6502506   | 68.67     |
| 10-14      | 10       | 5        | 0.5       | 3754000    | 1706         | 0.000454  | 0.002269  | 0.997731  | 94457     | 214       | 471748    | 6029628   | 63.83     |
| 15-19      | 15       | 5        | 0.5       | 3851000    | 2456         | 0.000638  | 0.003184  | 0.996816  | 94242     | 300       | 470462    | 5557880   | 58.97     |
| 20-24      | 20       | 5        | 0.5       | 3821000    | 5247         | 0.001373  | 0.006842  | 0.993158  | 93942     | 643       | 468105    | 5087418   | 54.15     |
| 25-29      | 25       | 5        | 0.5       | 3466000    | 5623         | 0.001622  | 0.008079  | 0.991921  | 93300     | 754       | 464614    | 4619313   | 49.51     |
| 30-34      | 30       | 5        | 0.5       | 3093000    | 5148         | 0.001664  | 0.008287  | 0.991713  | 92546     | 767       | 460812    | 4154699   | 44.89     |
| 35-39      | 35       | 5        | 0.5       | 2783000    | 6866         | 0.002467  | 0.012226  | 0.98774   | 91779     | 1125      | 456082    | 3693887   | 40.25     |
| 40-44      | 40       | 5        | 0.5       | 2525000    | 6534         | 0.002588  | 0.012855  | 0.987145  | 90654     | 1165      | 450355    | 3237806   | 35.72     |
| 45-49      | 45       | 5        | 0.5       | 2272000    | 7073         | 0.003113  | 0.015446  | 0.984554  | 89488     | 1382      | 443986    | 2787451   | 31.15     |
| 50-54      | 50       | 5        | 0.5       | 1946000    | 12073        | 0.006204  | 0.030546  | 0.969454  | 88106     | 2691      | 433802    | 2343464   | 26.60     |
| 55-59      | 55       | 5        | 0.5       | 1566000    | 13742        | 0.008775  | 0.042935  | 0.957065  | 85415     | 3667      | 417906    | 1909662   | 22.36     |
| 60-64      | 60       | 5        | 0.5       | 1188000    | 17226        | 0.0145    | 0.069964  | 0.930036  | 81748     | 5719      | 394440    | 1491756   | 18.25     |
| 65-69      | 65       | 5        | 0.5       | 906000     | 26365        | 0.0291    | 0.135633  | 0.864367  | 76028     | 10312     | 354361    | 1097316   | 14.43     |
| 70-74      | 70       | 5        | 0.5       | 698000     | 29456        | 0.0422    | 0.190864  | 0.809136  | 65716     | 12543     | 297224    | 742954.9  | 11.31     |
| 75-79      | 75       | 5        | 0.5       | 480000     | 37536        | 0.0782    | 0.32706   | 0.67294   | 53173     | 17391     | 222390    | 445730.5  | 8.38      |
| 80-85      | 80       | 5        | 0.5       | 163628     | 18719        | 0.1144    | 0.44479   | 0.55521   | 35783     | 15916     | 139123    | 223340.6  | 6.24      |
| 85+        | 85       | 0        | 0.5       | 122721     | 28950        | 0.2359    | 1         | 0         | 19867     | 19867     | 84217     | 84217.15  | 4.24      |
| All ages   |          |          |           | 40781349   | 272111       |           |           |           |           |           |           |           |           |

**NAGALAND**

Estimated abridged life table for 2019

**MALES**

| <i>Age</i> | <i>x</i> | <i>n</i> | <i>ax</i> | <i>pop</i> | <i>death</i> | <i>Mx</i> | <i>qx</i> | <i>px</i> | <i>lx</i> | <i>dx</i> | <i>Lx</i> | <i>Tx</i> | <i>ex</i> |
|------------|----------|----------|-----------|------------|--------------|-----------|-----------|-----------|-----------|-----------|-----------|-----------|-----------|
| <1         | 0        | 1        | 0.1       | 20018      | 268          | 0.013398  | 0.013238  | 0.986762  | 100000    | 1324      | 98809     | 6999217   | 69.99     |
| 1-4        | 1        | 4        | 0.5       | 79306      | 402          | 0.005073  | 0.020087  | 0.979913  | 98676     | 1982      | 390741    | 6900408   | 69.93     |
| 5-9        | 5        | 5        | 0.5       | 101556     | 21           | 0.000208  | 0.001039  | 0.998961  | 96694     | 100       | 483219    | 6509668   | 67.32     |
| 10-14      | 10       | 5        | 0.5       | 111600     | 2            | 2.07E-05  | 0.000103  | 0.999897  | 96594     | 10        | 482943    | 6026448   | 62.39     |
| 15-19      | 15       | 5        | 0.5       | 109368     | 27           | 0.000248  | 0.00124   | 0.99876   | 96584     | 120       | 482619    | 5543505   | 57.40     |
| 20-24      | 20       | 5        | 0.5       | 112716     | 33           | 0.000294  | 0.001471  | 0.998529  | 96464     | 142       | 481965    | 5060886   | 52.46     |
| 25-29      | 25       | 5        | 0.5       | 106020     | 229          | 0.002162  | 0.010752  | 0.989248  | 96322     | 1036      | 479021    | 4578922   | 47.54     |
| 30-34      | 30       | 5        | 0.5       | 97092      | 280          | 0.002885  | 0.014324  | 0.985676  | 95286     | 1365      | 473020    | 4099901   | 43.03     |
| 35-39      | 35       | 5        | 0.5       | 82584      | 169          | 0.002045  | 0.010174  | 0.989826  | 93921     | 956       | 467219    | 3626881   | 38.62     |
| 40-44      | 40       | 5        | 0.5       | 73656      | 206          | 0.002803  | 0.013915  | 0.986085  | 92966     | 1294      | 461596    | 3159663   | 33.99     |
| 45-49      | 45       | 5        | 0.5       | 61380      | 314          | 0.00511   | 0.025229  | 0.974771  | 91672     | 2313      | 452580    | 2698067   | 29.43     |
| 50-54      | 50       | 5        | 0.5       | 47988      | 383          | 0.007989  | 0.039162  | 0.960838  | 89360     | 3499      | 438049    | 2245487   | 25.13     |
| 55-59      | 55       | 5        | 0.5       | 36828      | 461          | 0.01253   | 0.060746  | 0.939254  | 85860     | 5216      | 416261    | 1807438   | 21.05     |
| 60-64      | 60       | 5        | 0.5       | 27900      | 564          | 0.020215  | 0.096211  | 0.903789  | 80644     | 7759      | 383825    | 1391177   | 17.25     |
| 65-69      | 65       | 5        | 0.5       | 20088      | 641          | 0.031934  | 0.147866  | 0.852134  | 72885     | 10777     | 337484    | 1007352   | 13.82     |
| 70-74      | 70       | 5        | 0.5       | 13392      | 688          | 0.051385  | 0.227678  | 0.772322  | 62108     | 14141     | 275189    | 669868.3  | 10.79     |
| 75-79      | 75       | 5        | 0.5       | 7812       | 645          | 0.082567  | 0.342201  | 0.657799  | 47968     | 16415     | 198801    | 394679.1  | 8.23      |
| 80-85      | 80       | 5        | 0.5       | 4464       | 593          | 0.132771  | 0.498418  | 0.501582  | 31553     | 15727     | 118449    | 195877.8  | 6.21      |
| 85+        | 85       | 0        | 0.5       | 2232       | 456          | 0.204398  | 1         | 0         | 15826     | 15826     | 77429     | 77429.29  | 4.89      |
| All ages   |          |          |           | 1116000    | 6385         |           |           |           |           |           |           |           |           |

**NAGALAND**

Estimated abridged life table for 2019

**FEMALES**

| <i>Age</i> | <i>x</i> | <i>n</i> | <i>ax</i> | <i>pop</i> | <i>death</i> | <i>Mx</i> | <i>qx</i> | <i>px</i> | <i>lx</i> | <i>dx</i> | <i>Lx</i> | <i>Tx</i> | <i>ex</i> |
|------------|----------|----------|-----------|------------|--------------|-----------|-----------|-----------|-----------|-----------|-----------|-----------|-----------|
| <1         | 0        | 1        | 0.1       | 18100      | 489          | 0.027042  | 0.026399  | 0.973601  | 100000    | 2640      | 97624     | 7364590   | 73.65     |
| 1-4        | 1        | 4        | 0.5       | 71684      | 122          | 0.001707  | 0.006805  | 0.993195  | 97360     | 662       | 388115    | 7266966   | 74.64     |
| 5-9        | 5        | 5        | 0.5       | 92916      | 9            | 9.92E-05  | 0.000496  | 0.999504  | 96698     | 48        | 483368    | 6878851   | 71.14     |
| 10-14      | 10       | 5        | 0.5       | 101268     | 11           | 0.000111  | 0.000556  | 0.999444  | 96650     | 54        | 483114    | 6395483   | 66.17     |
| 15-19      | 15       | 5        | 0.5       | 105444     | 9            | 8.74E-05  | 0.000437  | 0.999563  | 96596     | 42        | 482874    | 5912369   | 61.21     |
| 20-24      | 20       | 5        | 0.5       | 120060     | 11           | 9.38E-05  | 0.000469  | 0.999531  | 96554     | 45        | 482655    | 5429496   | 56.23     |
| 25-29      | 25       | 5        | 0.5       | 108576     | 131          | 0.00121   | 0.006031  | 0.993969  | 96508     | 582       | 481087    | 4946841   | 51.26     |
| 30-34      | 30       | 5        | 0.5       | 95004      | 161          | 0.00169   | 0.008414  | 0.991586  | 95926     | 807       | 477613    | 4465754   | 46.55     |
| 35-39      | 35       | 5        | 0.5       | 77256      | 157          | 0.002029  | 0.010091  | 0.989909  | 95119     | 960       | 473196    | 3988141   | 41.93     |
| 40-44      | 40       | 5        | 0.5       | 63684      | 192          | 0.003008  | 0.014926  | 0.985074  | 94159     | 1405      | 467283    | 3514945   | 37.33     |
| 45-49      | 45       | 5        | 0.5       | 51156      | 150          | 0.002939  | 0.01459   | 0.98541   | 92754     | 1353      | 460386    | 3047662   | 32.86     |
| 50-54      | 50       | 5        | 0.5       | 38628      | 175          | 0.004537  | 0.022429  | 0.977571  | 91401     | 2050      | 451878    | 2587277   | 28.31     |
| 55-59      | 55       | 5        | 0.5       | 36540      | 260          | 0.007105  | 0.034906  | 0.965094  | 89351     | 3119      | 438955    | 2135399   | 23.90     |
| 60-64      | 60       | 5        | 0.5       | 24012      | 275          | 0.011435  | 0.055588  | 0.944412  | 86232     | 4793      | 419175    | 1696444   | 19.67     |
| 65-69      | 65       | 5        | 0.5       | 16704      | 430          | 0.025754  | 0.120982  | 0.879018  | 81438     | 9853      | 382560    | 1277269   | 15.68     |
| 70-74      | 70       | 5        | 0.5       | 10440      | 369          | 0.035318  | 0.162262  | 0.837738  | 71586     | 11616     | 328889    | 894709    | 12.50     |
| 75-79      | 75       | 5        | 0.5       | 7308       | 463          | 0.063385  | 0.273573  | 0.726427  | 59970     | 16406     | 258835    | 565819.5  | 9.44      |
| 80-85      | 80       | 5        | 0.5       | 3132       | 346          | 0.110455  | 0.43277   | 0.56723   | 43564     | 18853     | 170687    | 306984.7  | 7.05      |
| 85+        | 85       | 0        | 0.5       | 2088       | 379          | 0.181299  | 1         | 0         | 24711     | 24711     | 136298    | 136298.1  | 5.52      |
| All ages   |          |          |           | 1044000    | 4139         |           |           |           |           |           |           |           |           |

## ODISHA

Estimated abridged life table for 2019

## MALES

| Age      | <i>x</i> | <i>n</i> | <i>ax</i> | <i>pop</i> | <i>death</i> | <i>Mx</i> | <i>qx</i> | <i>px</i> | <i>lx</i> | <i>dx</i> | <i>Lx</i> | <i>Tx</i> | <i>ex</i> |
|----------|----------|----------|-----------|------------|--------------|-----------|-----------|-----------|-----------|-----------|-----------|-----------|-----------|
| <1       | 0        | 1        | 0.1       | 344000     | 12785        | 0.037166  | 0.035963  | 0.964037  | 100000    | 3596      | 96763     | 6649773   | 66.50     |
| 1-4      | 1        | 4        | 0.5       | 1335000    | 2829         | 0.002119  | 0.00844   | 0.99156   | 96404     | 814       | 383988    | 6553010   | 67.97     |
| 5-9      | 5        | 5        | 0.5       | 1661000    | 153          | 9.19E-05  | 0.00046   | 0.99954   | 95590     | 44        | 477840    | 6169022   | 64.54     |
| 10-14    | 10       | 5        | 0.5       | 1810000    | 2129         | 0.001176  | 0.005864  | 0.994136  | 95546     | 560       | 476330    | 5691181   | 59.56     |
| 15-19    | 15       | 5        | 0.5       | 1853000    | 1277         | 0.000689  | 0.003439  | 0.996561  | 94986     | 327       | 474112    | 5214852   | 54.90     |
| 20-24    | 20       | 5        | 0.5       | 1806000    | 3869         | 0.002142  | 0.010653  | 0.989347  | 94659     | 1008      | 470775    | 4740739   | 50.08     |
| 25-29    | 25       | 5        | 0.5       | 1689000    | 4734         | 0.002803  | 0.013916  | 0.986084  | 93651     | 1303      | 464995    | 4269965   | 45.59     |
| 30-34    | 30       | 5        | 0.5       | 1628000    | 4578         | 0.002812  | 0.013964  | 0.986036  | 92347     | 1289      | 458514    | 3804969   | 41.20     |
| 35-39    | 35       | 5        | 0.5       | 1547000    | 6718         | 0.004342  | 0.021479  | 0.978521  | 91058     | 1956      | 450400    | 3346456   | 36.75     |
| 40-44    | 40       | 5        | 0.5       | 1452000    | 8187         | 0.005638  | 0.0278    | 0.9722    | 89102     | 2477      | 439318    | 2896055   | 32.50     |
| 45-49    | 45       | 5        | 0.5       | 1373000    | 13871        | 0.010103  | 0.049271  | 0.950729  | 86625     | 4268      | 422455    | 2456737   | 28.36     |
| 50-54    | 50       | 5        | 0.5       | 1258000    | 11144        | 0.008858  | 0.043332  | 0.956668  | 82357     | 3569      | 402863    | 2034282   | 24.70     |
| 55-59    | 55       | 5        | 0.5       | 1063000    | 16439        | 0.015464  | 0.074444  | 0.925556  | 78788     | 5865      | 379278    | 1631418   | 20.71     |
| 60-64    | 60       | 5        | 0.5       | 820000     | 19374        | 0.023627  | 0.111548  | 0.888452  | 72923     | 8134      | 344279    | 1252140   | 17.17     |
| 65-69    | 65       | 5        | 0.5       | 632000     | 32300        | 0.051107  | 0.226586  | 0.773414  | 64789     | 14680     | 287243    | 907860.6  | 14.01     |
| 70-74    | 70       | 5        | 0.5       | 491000     | 24010        | 0.0489    | 0.217866  | 0.782134  | 50108     | 10917     | 223250    | 620618    | 12.39     |
| 75-79    | 75       | 5        | 0.5       | 323000     | 20866        | 0.0646    | 0.278089  | 0.721911  | 39192     | 10899     | 168711    | 397368.1  | 10.14     |
| 80-85    | 80       | 5        | 0.5       | 192060     | 16740        | 0.087161  | 0.357832  | 0.642168  | 28293     | 10124     | 116154    | 228657.3  | 8.08      |
| 85+      | 85       | 0        | 0.5       | 106700     | 17231        | 0.161495  | 1         | 0         | 18169     | 18169     | 112503    | 112503.5  | 6.19      |
| All ages |          |          |           | 21383760   | 219233       |           |           |           |           |           |           |           |           |

## ODISHA

Estimated abridged life table for 2019

## FEMALES

| Age      | <i>x</i> | <i>n</i> | <i>ax</i> | <i>pop</i> | <i>death</i> | <i>Mx</i> | <i>qx</i> | <i>px</i> | <i>lx</i> | <i>dx</i> | <i>Lx</i> | <i>Tx</i> | <i>ex</i> |
|----------|----------|----------|-----------|------------|--------------|-----------|-----------|-----------|-----------|-----------|-----------|-----------|-----------|
| <1       | 0        | 1        | 0.1       | 344000     | 11810        | 0.034333  | 0.033304  | 0.966696  | 100000    | 3330      | 97003     | 7095697   | 70.96     |
| 1-4      | 1        | 4        | 0.5       | 1338000    | 3417         | 0.002554  | 0.010164  | 0.989836  | 96670     | 983       | 384713    | 6998694   | 72.40     |
| 5-9      | 5        | 5        | 0.5       | 1724000    | 1157         | 0.000671  | 0.00335   | 0.99665   | 95687     | 321       | 477634    | 6613981   | 69.12     |
| 10-14    | 10       | 5        | 0.5       | 1839000    | 968          | 0.000527  | 0.002629  | 0.997371  | 95366     | 251       | 476206    | 6136347   | 64.34     |
| 15-19    | 15       | 5        | 0.5       | 1942000    | 1915         | 0.000986  | 0.004918  | 0.995082  | 95116     | 468       | 474409    | 5660141   | 59.51     |
| 20-24    | 20       | 5        | 0.5       | 2002000    | 2558         | 0.001278  | 0.006368  | 0.993632  | 94648     | 603       | 471733    | 5185732   | 54.79     |
| 25-29    | 25       | 5        | 0.5       | 1935000    | 3416         | 0.001765  | 0.008788  | 0.991212  | 94045     | 826       | 468160    | 4713999   | 50.12     |
| 30-34    | 30       | 5        | 0.5       | 1856000    | 2509         | 0.001352  | 0.006736  | 0.993264  | 93219     | 628       | 464524    | 4245839   | 45.55     |
| 35-39    | 35       | 5        | 0.5       | 1735000    | 3806         | 0.002193  | 0.010907  | 0.989093  | 92591     | 1010      | 460429    | 3781316   | 40.84     |
| 40-44    | 40       | 5        | 0.5       | 1578000    | 4949         | 0.003136  | 0.01556   | 0.98444   | 91581     | 1425      | 454342    | 3320887   | 36.26     |
| 45-49    | 45       | 5        | 0.5       | 1435000    | 7015         | 0.004889  | 0.024148  | 0.975852  | 90156     | 2177      | 445336    | 2866545   | 31.80     |
| 50-54    | 50       | 5        | 0.5       | 1254000    | 8854         | 0.007061  | 0.034693  | 0.965307  | 87979     | 3052      | 432263    | 2421208   | 27.52     |
| 55-59    | 55       | 5        | 0.5       | 1039000    | 9405         | 0.009052  | 0.044258  | 0.955742  | 84927     | 3759      | 415236    | 1988945   | 23.42     |
| 60-64    | 60       | 5        | 0.5       | 831000     | 16373        | 0.019703  | 0.09389   | 0.90611   | 81168     | 7621      | 386787    | 1573709   | 19.39     |
| 65-69    | 65       | 5        | 0.5       | 669000     | 24892        | 0.037208  | 0.170206  | 0.829794  | 73547     | 12518     | 336440    | 1186922   | 16.14     |
| 70-74    | 70       | 5        | 0.5       | 526000     | 20882        | 0.0397    | 0.180578  | 0.819422  | 61029     | 11020     | 277593    | 850482.7  | 13.94     |
| 75-79    | 75       | 5        | 0.5       | 353000     | 23227        | 0.0658    | 0.282525  | 0.717475  | 50008     | 14129     | 214721    | 572889.5  | 11.46     |
| 80-85    | 80       | 5        | 0.5       | 204237     | 16993        | 0.0832    | 0.344371  | 0.655629  | 35880     | 12356     | 148509    | 358169    | 9.98      |
| 85+      | 85       | 0        | 0.5       | 113465     | 12731        | 0.1122    | 1         | 0         | 23524     | 23524     | 209660    | 209659.9  | 8.91      |
| All ages |          |          |           | 22717702   | 176879       |           |           |           |           |           |           |           |           |



**PUNJAB**

Estimated abridged life table for 2019

**MALES**

| <i>Age</i> | <i>x</i> | <i>n</i> | <i>ax</i> | <i>pop</i> | <i>death</i> | <i>Mx</i> | <i>qx</i> | <i>px</i> | <i>lx</i> | <i>dx</i> | <i>Lx</i> | <i>Tx</i> | <i>ex</i> |
|------------|----------|----------|-----------|------------|--------------|-----------|-----------|-----------|-----------|-----------|-----------|-----------|-----------|
| <1         | 0        | 1        | 0.1       | 209000     | 3222         | 0.015415  | 0.015204  | 0.984796  | 100000    | 1520      | 98632     | 6961516   | 69.62     |
| 1-4        | 1        | 4        | 0.5       | 828000     | 1674         | 0.002022  | 0.008055  | 0.991945  | 98480     | 793       | 392332    | 6862884   | 69.69     |
| 5-9        | 5        | 5        | 0.5       | 1107000    | 711          | 0.000642  | 0.003205  | 0.996795  | 97686     | 313       | 487649    | 6470552   | 66.24     |
| 10-14      | 10       | 5        | 0.5       | 1177000    | 177          | 0.000151  | 0.000753  | 0.999247  | 97373     | 73        | 486683    | 5982903   | 61.44     |
| 15-19      | 15       | 5        | 0.5       | 1328000    | 1157         | 0.000871  | 0.004348  | 0.995652  | 97300     | 423       | 485442    | 5496221   | 56.49     |
| 20-24      | 20       | 5        | 0.5       | 1479000    | 2043         | 0.001381  | 0.006881  | 0.993119  | 96877     | 667       | 482718    | 5010779   | 51.72     |
| 25-29      | 25       | 5        | 0.5       | 1539000    | 2623         | 0.001704  | 0.008485  | 0.991515  | 96210     | 816       | 479010    | 4528061   | 47.06     |
| 30-34      | 30       | 5        | 0.5       | 1447000    | 3909         | 0.002701  | 0.013416  | 0.986584  | 95394     | 1280      | 473770    | 4049051   | 42.45     |
| 35-39      | 35       | 5        | 0.5       | 1263000    | 3976         | 0.003148  | 0.015617  | 0.984383  | 94114     | 1470      | 466896    | 3575281   | 37.99     |
| 40-44      | 40       | 5        | 0.5       | 1090000    | 6691         | 0.006139  | 0.03023   | 0.96977   | 92644     | 2801      | 456220    | 3108385   | 33.55     |
| 45-49      | 45       | 5        | 0.5       | 969000     | 6270         | 0.00647   | 0.031837  | 0.968163  | 89844     | 2860      | 442068    | 2652165   | 29.52     |
| 50-54      | 50       | 5        | 0.5       | 864000     | 8997         | 0.010414  | 0.050747  | 0.949253  | 86983     | 4414      | 423881    | 2210097   | 25.41     |
| 55-59      | 55       | 5        | 0.5       | 741000     | 9778         | 0.013196  | 0.063872  | 0.936128  | 82569     | 5274      | 399661    | 1786216   | 21.63     |
| 60-64      | 60       | 5        | 0.5       | 585000     | 11733        | 0.020057  | 0.095495  | 0.904505  | 77295     | 7381      | 368024    | 1386555   | 17.94     |
| 65-69      | 65       | 5        | 0.5       | 446000     | 25241        | 0.056595  | 0.2479    | 0.7521    | 69914     | 17332     | 306241    | 1018531   | 14.57     |
| 70-74      | 70       | 5        | 0.5       | 357000     | 14590        | 0.040868  | 0.185397  | 0.814603  | 52582     | 9749      | 238540    | 712290.1  | 13.55     |
| 75-79      | 75       | 5        | 0.5       | 260000     | 11550        | 0.044422  | 0.19991   | 0.80009   | 42834     | 8563      | 192762    | 473749.8  | 11.06     |
| 80-85      | 80       | 5        | 0.5       | 111601     | 9647         | 0.08644   | 0.355397  | 0.644603  | 34271     | 12180     | 140905    | 280988.1  | 8.20      |
| 85+        | 85       | 0        | 0.5       | 63772      | 10057        | 0.1577    | 1         | 0         | 22091     | 22091     | 140083    | 140083.2  | 6.34      |
| All ages   |          |          |           | 15864373   | 134045       |           |           |           |           |           |           |           |           |

**PUNJAB**

Estimated abridged life table for 2019

**FEMALES**

| <i>Age</i> | <i>x</i> | <i>n</i> | <i>ax</i> | <i>pop</i> | <i>death</i> | <i>Mx</i> | <i>qx</i> | <i>px</i> | <i>lx</i> | <i>dx</i> | <i>Lx</i> | <i>Tx</i> | <i>ex</i> |
|------------|----------|----------|-----------|------------|--------------|-----------|-----------|-----------|-----------|-----------|-----------|-----------|-----------|
| <1         | 0        | 1        | 0.1       | 185000     | 2686         | 0.014517  | 0.01433   | 0.98567   | 100000    | 1433      | 98710     | 7452313   | 74.52     |
| 1-4        | 1        | 4        | 0.5       | 730000     | 1429         | 0.001958  | 0.007801  | 0.992199  | 98567     | 769       | 392730    | 7353603   | 74.61     |
| 5-9        | 5        | 5        | 0.5       | 962000     | 366          | 0.00038   | 0.0019    | 0.9981    | 97798     | 186       | 488526    | 6960873   | 71.18     |
| 10-14      | 10       | 5        | 0.5       | 983000     | 314          | 0.00032   | 0.001597  | 0.998403  | 97612     | 156       | 487671    | 6472347   | 66.31     |
| 15-19      | 15       | 5        | 0.5       | 1089000    | 531          | 0.000487  | 0.002434  | 0.997566  | 97456     | 237       | 486688    | 5984676   | 61.41     |
| 20-24      | 20       | 5        | 0.5       | 1206000    | 1499         | 0.001243  | 0.006194  | 0.993806  | 97219     | 602       | 484590    | 5497987   | 56.55     |
| 25-29      | 25       | 5        | 0.5       | 1281000    | 1763         | 0.001376  | 0.006859  | 0.993141  | 96617     | 663       | 481428    | 5013397   | 51.89     |
| 30-34      | 30       | 5        | 0.5       | 1274000    | 1717         | 0.001348  | 0.006717  | 0.993283  | 95954     | 645       | 478160    | 4531969   | 47.23     |
| 35-39      | 35       | 5        | 0.5       | 1182000    | 2505         | 0.002119  | 0.010541  | 0.989459  | 95310     | 1005      | 474037    | 4053809   | 42.53     |
| 40-44      | 40       | 5        | 0.5       | 1053000    | 3634         | 0.003451  | 0.017108  | 0.982892  | 94305     | 1613      | 467492    | 3579772   | 37.96     |
| 45-49      | 45       | 5        | 0.5       | 953000     | 3094         | 0.003246  | 0.016101  | 0.983899  | 92692     | 1492      | 459728    | 3112280   | 33.58     |
| 50-54      | 50       | 5        | 0.5       | 852000     | 6755         | 0.007929  | 0.038874  | 0.961126  | 91199     | 3545      | 447134    | 2652553   | 29.09     |
| 55-59      | 55       | 5        | 0.5       | 718000     | 6401         | 0.008915  | 0.043605  | 0.956395  | 87654     | 3822      | 428715    | 2205419   | 25.16     |
| 60-64      | 60       | 5        | 0.5       | 562000     | 9327         | 0.016596  | 0.079675  | 0.920325  | 83832     | 6679      | 402462    | 1776704   | 21.19     |
| 65-69      | 65       | 5        | 0.5       | 457000     | 19080        | 0.041751  | 0.189024  | 0.810976  | 77153     | 14584     | 349304    | 1374242   | 17.81     |
| 70-74      | 70       | 5        | 0.5       | 386000     | 10016        | 0.025948  | 0.121834  | 0.878166  | 62569     | 7623      | 293787    | 1024938   | 16.38     |
| 75-79      | 75       | 5        | 0.5       | 265000     | 7649         | 0.028865  | 0.134611  | 0.865389  | 54946     | 7396      | 256239    | 731151.2  | 13.31     |
| 80-85      | 80       | 5        | 0.5       | 100765     | 6625         | 0.06575   | 0.282341  | 0.717659  | 47550     | 13425     | 204185    | 474912.4  | 9.99      |
| 85+        | 85       | 0        | 0.5       | 86370      | 10887        | 0.126047  | 1         | 0         | 34124     | 34124     | 270727    | 270727.4  | 7.93      |
| All ages   |          |          |           | 14325135   | 96278        |           |           |           |           |           |           |           |           |

**RAJASTHAN**

Estimated abridged life table for 2019

**MALES**

| <i>Age</i> | <i>x</i> | <i>n</i> | <i>ax</i> | <i>pop</i> | <i>death</i> | <i>Mx</i> | <i>qx</i> | <i>px</i> | <i>lx</i> | <i>dx</i> | <i>Lx</i> | <i>Tx</i> | <i>ex</i> |
|------------|----------|----------|-----------|------------|--------------|-----------|-----------|-----------|-----------|-----------|-----------|-----------|-----------|
| <1         | 0        | 1        | 0.1       | 836000     | 30121        | 0.03603   | 0.034898  | 0.965102  | 100000    | 3490      | 96859     | 6594115   | 65.94     |
| 1-4        | 1        | 4        | 0.5       | 3264000    | 4431         | 0.001357  | 0.005415  | 0.994585  | 96510     | 523       | 384995    | 6497256   | 67.32     |
| 5-9        | 5        | 5        | 0.5       | 4242000    | 1363         | 0.000321  | 0.001605  | 0.998395  | 95988     | 154       | 479553    | 6112260   | 63.68     |
| 10-14      | 10       | 5        | 0.5       | 3941000    | 1238         | 0.000314  | 0.001569  | 0.998431  | 95833     | 150       | 478791    | 5632708   | 58.78     |
| 15-19      | 15       | 5        | 0.5       | 4070000    | 3561         | 0.000875  | 0.004365  | 0.995635  | 95683     | 418       | 477371    | 5153916   | 53.86     |
| 20-24      | 20       | 5        | 0.5       | 4097000    | 5940         | 0.00145   | 0.007224  | 0.992776  | 95265     | 688       | 474607    | 4676545   | 49.09     |
| 25-29      | 25       | 5        | 0.5       | 3737000    | 8461         | 0.002264  | 0.011257  | 0.988743  | 94577     | 1065      | 470225    | 4201938   | 44.43     |
| 30-34      | 30       | 5        | 0.5       | 3204000    | 8936         | 0.002789  | 0.013848  | 0.986152  | 93513     | 1295      | 464326    | 3731713   | 39.91     |
| 35-39      | 35       | 5        | 0.5       | 2683000    | 9801         | 0.003653  | 0.0181    | 0.9819    | 92218     | 1669      | 456915    | 3267388   | 35.43     |
| 40-44      | 40       | 5        | 0.5       | 2298000    | 13435        | 0.005846  | 0.02881   | 0.97119   | 90548     | 2609      | 446221    | 2810472   | 31.04     |
| 45-49      | 45       | 5        | 0.5       | 2036000    | 14748        | 0.007244  | 0.035574  | 0.964426  | 87940     | 3128      | 431878    | 2364252   | 26.88     |
| 50-54      | 50       | 5        | 0.5       | 1760000    | 22862        | 0.01299   | 0.062906  | 0.937094  | 84811     | 5335      | 410719    | 1932374   | 22.78     |
| 55-59      | 55       | 5        | 0.5       | 1450000    | 25752        | 0.01776   | 0.085026  | 0.914974  | 79476     | 6758      | 380487    | 1521655   | 19.15     |
| 60-64      | 60       | 5        | 0.5       | 1121000    | 32806        | 0.029265  | 0.136348  | 0.863652  | 72719     | 9915      | 338806    | 1141167   | 15.69     |
| 65-69      | 65       | 5        | 0.5       | 812000     | 38184        | 0.047024  | 0.210387  | 0.789613  | 62804     | 13213     | 280986    | 802361.6  | 12.78     |
| 70-74      | 70       | 5        | 0.5       | 569000     | 27631        | 0.048561  | 0.216518  | 0.783482  | 49591     | 10737     | 221110    | 521376.1  | 10.51     |
| 75-79      | 75       | 5        | 0.5       | 368000     | 27688        | 0.07524   | 0.31664   | 0.68336   | 38853     | 12303     | 163510    | 300266.4  | 7.73      |
| 80-85      | 80       | 5        | 0.5       | 163088     | 22834        | 0.140009  | 0.518544  | 0.481456  | 26551     | 13768     | 98335     | 136756.1  | 5.15      |
| 85+        | 85       | 0        | 0.5       | 81544      | 27130        | 0.332705  | 1         | 0         | 12783     | 12783     | 38422     | 38421.57  | 3.01      |
| All ages   |          |          |           | 40732632   | 326922       |           |           |           |           |           |           |           |           |

**RAJASTHAN**

Estimated abridged life table for 2019

**FEMALES**

| <i>Age</i> | <i>x</i> | <i>n</i> | <i>ax</i> | <i>pop</i> | <i>death</i> | <i>Mx</i> | <i>qx</i> | <i>px</i> | <i>lx</i> | <i>dx</i> | <i>Lx</i> | <i>Tx</i> | <i>ex</i> |
|------------|----------|----------|-----------|------------|--------------|-----------|-----------|-----------|-----------|-----------|-----------|-----------|-----------|
| <1         | 0        | 1        | 0.1       | 731000     | 25764        | 0.035246  | 0.034162  | 0.965838  | 100000    | 3416      | 96925     | 7156285   | 71.56     |
| 1-4        | 1        | 4        | 0.5       | 2855000    | 5132         | 0.001798  | 0.007165  | 0.992835  | 96584     | 692       | 384951    | 7059359   | 73.09     |
| 5-9        | 5        | 5        | 0.5       | 3663000    | 777          | 0.000212  | 0.00106   | 0.99894   | 95892     | 102       | 479205    | 6674408   | 69.60     |
| 10-14      | 10       | 5        | 0.5       | 3589000    | 1047         | 0.000292  | 0.001457  | 0.998543  | 95790     | 140       | 478602    | 6195203   | 64.67     |
| 15-19      | 15       | 5        | 0.5       | 3706000    | 2748         | 0.000742  | 0.003701  | 0.996299  | 95651     | 354       | 477368    | 5716601   | 59.77     |
| 20-24      | 20       | 5        | 0.5       | 3713000    | 2609         | 0.000703  | 0.003507  | 0.996493  | 95297     | 334       | 475647    | 5239233   | 54.98     |
| 25-29      | 25       | 5        | 0.5       | 3399000    | 3583         | 0.001054  | 0.005257  | 0.994743  | 94962     | 499       | 473564    | 4763586   | 50.16     |
| 30-34      | 30       | 5        | 0.5       | 2986000    | 4149         | 0.001389  | 0.006923  | 0.993077  | 94463     | 654       | 470681    | 4290022   | 45.41     |
| 35-39      | 35       | 5        | 0.5       | 2606000    | 4907         | 0.001883  | 0.009371  | 0.990629  | 93809     | 879       | 466848    | 3819342   | 40.71     |
| 40-44      | 40       | 5        | 0.5       | 2311000    | 4529         | 0.00196   | 0.009751  | 0.990249  | 92930     | 906       | 462385    | 3352494   | 36.08     |
| 45-49      | 45       | 5        | 0.5       | 2057000    | 8661         | 0.004211  | 0.020834  | 0.979166  | 92024     | 1917      | 455327    | 2890108   | 31.41     |
| 50-54      | 50       | 5        | 0.5       | 1765000    | 9015         | 0.005108  | 0.025216  | 0.974784  | 90107     | 2272      | 444853    | 2434782   | 27.02     |
| 55-59      | 55       | 5        | 0.5       | 1450000    | 10815        | 0.007458  | 0.03661   | 0.96339   | 87835     | 3216      | 431134    | 1989928   | 22.66     |
| 60-64      | 60       | 5        | 0.5       | 1134000    | 25205        | 0.022227  | 0.105284  | 0.894716  | 84619     | 8909      | 400823    | 1558794   | 18.42     |
| 65-69      | 65       | 5        | 0.5       | 889000     | 27039        | 0.030415  | 0.141331  | 0.858669  | 75710     | 10700     | 351800    | 1157971   | 15.29     |
| 70-74      | 70       | 5        | 0.5       | 704000     | 23515        | 0.033402  | 0.154137  | 0.845863  | 65010     | 10020     | 299998    | 806171.8  | 12.40     |
| 75-79      | 75       | 5        | 0.5       | 502000     | 23468        | 0.046749  | 0.209287  | 0.790713  | 54989     | 11509     | 246176    | 506173.7  | 9.20      |
| 80-85      | 80       | 5        | 0.5       | 192545     | 22351        | 0.11608   | 0.449853  | 0.550147  | 43481     | 19560     | 168504    | 259997.9  | 5.98      |
| 85+        | 85       | 0        | 0.5       | 115527     | 30204        | 0.261449  | 1         | 0         | 23921     | 23921     | 91494     | 91493.52  | 3.82      |
| All ages   |          |          |           | 38368072   | 235519       |           |           |           |           |           |           |           |           |

## SIKKIM

## Estimated abridged life table for 2019

## MALES

| Age      | <i>x</i> | <i>n</i> | <i>ax</i> | <i>pop</i> | <i>death</i> | <i>Mx</i> | <i>qx</i> | <i>px</i> | <i>lx</i> | <i>dx</i> | <i>Lx</i> | <i>Tx</i> | <i>ex</i> |
|----------|----------|----------|-----------|------------|--------------|-----------|-----------|-----------|-----------|-----------|-----------|-----------|-----------|
| <1       | 0        | 1        | 0.1       | 4540       | 60           | 0.013213  | 0.013058  | 0.986942  | 100000    | 1306      | 98825     | 7244055   | 72.44     |
| 1-4      | 1        | 4        | 0.5       | 17988      | 18           | 0.001012  | 0.004038  | 0.995962  | 98694     | 399       | 393980    | 7145230   | 72.40     |
| 5-9      | 5        | 5        | 0.5       | 28160      | 9            | 0.000322  | 0.001607  | 0.998393  | 98296     | 158       | 491083    | 6751251   | 68.68     |
| 10-14    | 10       | 5        | 0.5       | 30272      | 11           | 0.000363  | 0.001815  | 0.998185  | 98138     | 178       | 490243    | 6260167   | 63.79     |
| 15-19    | 15       | 5        | 0.5       | 30976      | 24           | 0.000775  | 0.003866  | 0.996134  | 97960     | 379       | 488851    | 5769924   | 58.90     |
| 20-24    | 20       | 5        | 0.5       | 30976      | 30           | 0.000968  | 0.004831  | 0.995169  | 97581     | 471       | 486725    | 5281074   | 54.12     |
| 25-29    | 25       | 5        | 0.5       | 33440      | 36           | 0.001089  | 0.005431  | 0.994569  | 97109     | 527       | 484228    | 4794349   | 49.37     |
| 30-34    | 30       | 5        | 0.5       | 29568      | 44           | 0.001479  | 0.007368  | 0.992632  | 96582     | 712       | 481131    | 4310120   | 44.63     |
| 35-39    | 35       | 5        | 0.5       | 26752      | 57           | 0.002131  | 0.010598  | 0.989402  | 95870     | 1016      | 476812    | 3828989   | 39.94     |
| 40-44    | 40       | 5        | 0.5       | 23584      | 70           | 0.002973  | 0.014756  | 0.985244  | 94854     | 1400      | 470772    | 3352178   | 35.34     |
| 45-49    | 45       | 5        | 0.5       | 20768      | 101          | 0.004886  | 0.024133  | 0.975867  | 93455     | 2255      | 461635    | 2881406   | 30.83     |
| 50-54    | 50       | 5        | 0.5       | 19712      | 123          | 0.006224  | 0.030641  | 0.969359  | 91199     | 2794      | 449010    | 2419771   | 26.53     |
| 55-59    | 55       | 5        | 0.5       | 16896      | 162          | 0.009569  | 0.046726  | 0.953274  | 88405     | 4131      | 431697    | 1970761   | 22.29     |
| 60-64    | 60       | 5        | 0.5       | 12672      | 205          | 0.016172  | 0.077719  | 0.922281  | 84274     | 6550      | 404996    | 1539064   | 18.26     |
| 65-69    | 65       | 5        | 0.5       | 9504       | 215          | 0.022662  | 0.107235  | 0.892765  | 77724     | 8335      | 367784    | 1134069   | 14.59     |
| 70-74    | 70       | 5        | 0.5       | 6688       | 338          | 0.050589  | 0.224546  | 0.775454  | 69389     | 15581     | 307995    | 766284.3  | 11.04     |
| 75-79    | 75       | 5        | 0.5       | 4224       | 330          | 0.078181  | 0.326992  | 0.673008  | 53808     | 17595     | 225055    | 458289.8  | 8.52      |
| 80-85    | 80       | 5        | 0.5       | 3168       | 405          | 0.127806  | 0.484293  | 0.515707  | 36213     | 17538     | 137223    | 233235.2  | 6.44      |
| 85+      | 85       | 0        | 0.5       | 2112       | 411          | 0.194511  | 1         | 0         | 18676     | 18676     | 96013     | 96012.66  | 5.14      |
| All ages |          |          |           | 352000     | 2650         |           |           |           |           |           |           |           |           |

## SIKKIM

Estimated abridged life table for 2019

## FEMALES

| Age      | <i>x</i> | <i>n</i> | <i>ax</i> | <i>pop</i> | <i>death</i> | <i>Mx</i> | <i>qx</i> | <i>px</i> | <i>lx</i> | <i>dx</i> | <i>Lx</i> | <i>Tx</i> | <i>ex</i> |
|----------|----------|----------|-----------|------------|--------------|-----------|-----------|-----------|-----------|-----------|-----------|-----------|-----------|
| <1       | 0        | 1        | 0.1       | 3810       | 48           | 0.012675  | 0.012532  | 0.987468  | 100000    | 1253      | 98872     | 7711522   | 77.12     |
| 1-4      | 1        | 4        | 0.5       | 15090      | 17           | 0.001156  | 0.004615  | 0.995385  | 98747     | 456       | 394076    | 7612650   | 77.09     |
| 5-9      | 5        | 5        | 0.5       | 22050      | 6            | 0.000273  | 0.001363  | 0.998637  | 98291     | 134       | 491121    | 7218574   | 73.44     |
| 10-14    | 10       | 5        | 0.5       | 24570      | 7            | 0.000299  | 0.001495  | 0.998505  | 98157     | 147       | 490419    | 6727453   | 68.54     |
| 15-19    | 15       | 5        | 0.5       | 24255      | 14           | 0.000572  | 0.002856  | 0.997144  | 98010     | 280       | 489352    | 6237034   | 63.64     |
| 20-24    | 20       | 5        | 0.5       | 33390      | 17           | 0.000508  | 0.002536  | 0.997464  | 97731     | 248       | 488033    | 5747682   | 58.81     |
| 25-29    | 25       | 5        | 0.5       | 32760      | 15           | 0.000463  | 0.002314  | 0.997686  | 97483     | 226       | 486849    | 5259649   | 53.95     |
| 30-34    | 30       | 5        | 0.5       | 27090      | 19           | 0.000685  | 0.003418  | 0.996582  | 97257     | 332       | 485454    | 4772799   | 49.07     |
| 35-39    | 35       | 5        | 0.5       | 24570      | 22           | 0.000916  | 0.004568  | 0.995432  | 96925     | 443       | 483516    | 4287345   | 44.23     |
| 40-44    | 40       | 5        | 0.5       | 22050      | 27           | 0.001247  | 0.006215  | 0.993785  | 96482     | 600       | 480910    | 3803829   | 39.43     |
| 45-49    | 45       | 5        | 0.5       | 17955      | 39           | 0.002157  | 0.010726  | 0.989274  | 95882     | 1028      | 476840    | 3322918   | 34.66     |
| 50-54    | 50       | 5        | 0.5       | 17325      | 47           | 0.002732  | 0.013567  | 0.986433  | 94854     | 1287      | 471052    | 2846078   | 30.00     |
| 55-59    | 55       | 5        | 0.5       | 14805      | 77           | 0.005195  | 0.025641  | 0.974359  | 93567     | 2399      | 461837    | 2375026   | 25.38     |
| 60-64    | 60       | 5        | 0.5       | 11340      | 106          | 0.009347  | 0.04567   | 0.95433   | 91168     | 4164      | 445430    | 1913190   | 20.99     |
| 65-69    | 65       | 5        | 0.5       | 8505       | 130          | 0.015266  | 0.073523  | 0.926477  | 87004     | 6397      | 419029    | 1467760   | 16.87     |
| 70-74    | 70       | 5        | 0.5       | 5985       | 266          | 0.04437   | 0.199697  | 0.800303  | 80607     | 16097     | 362794    | 1048731   | 13.01     |
| 75-79    | 75       | 5        | 0.5       | 4095       | 209          | 0.051068  | 0.226432  | 0.773568  | 64510     | 14607     | 286034    | 685937.3  | 10.63     |
| 80-85    | 80       | 5        | 0.5       | 3150       | 293          | 0.093099  | 0.377607  | 0.622393  | 49903     | 18844     | 202406    | 399903.6  | 8.01      |
| 85+      | 85       | 0        | 0.5       | 2205       | 347          | 0.157265  | 1         | 0         | 31059     | 31059     | 197497    | 197497.3  | 6.36      |
| All ages |          |          |           | 315000     | 1707         |           |           |           |           |           |           |           |           |

**TAMIL NADU**

Estimated abridged life table for 2019

**MALES**

| <i>Age</i> | <i>x</i> | <i>n</i> | <i>ax</i> | <i>pop</i> | <i>death</i> | <i>Mx</i> | <i>qx</i> | <i>px</i> | <i>lx</i> | <i>dx</i> | <i>Lx</i> | <i>Tx</i> | <i>ex</i> |
|------------|----------|----------|-----------|------------|--------------|-----------|-----------|-----------|-----------|-----------|-----------|-----------|-----------|
| <1         | 0        | 1        | 0.1       | 497000     | 7811         | 0.015715  | 0.015496  | 0.984504  | 100000    | 1550      | 98605     | 6795145   | 67.95     |
| 1-4        | 1        | 4        | 0.5       | 1969000    | 1273         | 0.000646  | 0.002582  | 0.997418  | 98450     | 254       | 393293    | 6696540   | 68.02     |
| 5-9        | 5        | 5        | 0.5       | 2711000    | 1250         | 0.000461  | 0.002303  | 0.997697  | 98196     | 226       | 490416    | 6303247   | 64.19     |
| 10-14      | 10       | 5        | 0.5       | 2721000    | 808          | 0.000297  | 0.001483  | 0.998517  | 97970     | 145       | 489487    | 5812831   | 59.33     |
| 15-19      | 15       | 5        | 0.5       | 2881000    | 4305         | 0.001494  | 0.007443  | 0.992557  | 97825     | 728       | 487303    | 5323344   | 54.42     |
| 20-24      | 20       | 5        | 0.5       | 3075000    | 5081         | 0.001653  | 0.008229  | 0.991771  | 97097     | 799       | 483486    | 4836041   | 49.81     |
| 25-29      | 25       | 5        | 0.5       | 3141000    | 6626         | 0.002109  | 0.010492  | 0.989508  | 96298     | 1010      | 478963    | 4352555   | 45.20     |
| 30-34      | 30       | 5        | 0.5       | 3124000    | 10241        | 0.003278  | 0.016258  | 0.983742  | 95287     | 1549      | 472564    | 3873592   | 40.65     |
| 35-39      | 35       | 5        | 0.5       | 3058000    | 12163        | 0.003977  | 0.019691  | 0.980309  | 93738     | 1846      | 464076    | 3401029   | 36.28     |
| 40-44      | 40       | 5        | 0.5       | 2877000    | 17783        | 0.006181  | 0.030435  | 0.969565  | 91892     | 2797      | 452470    | 2936952   | 31.96     |
| 45-49      | 45       | 5        | 0.5       | 2650000    | 26154        | 0.00987   | 0.04816   | 0.95184   | 89096     | 4291      | 434751    | 2484483   | 27.89     |
| 50-54      | 50       | 5        | 0.5       | 2400000    | 26226        | 0.010927  | 0.053184  | 0.946816  | 84805     | 4510      | 412748    | 2049732   | 24.17     |
| 55-59      | 55       | 5        | 0.5       | 2071000    | 33986        | 0.01641   | 0.078819  | 0.921181  | 80295     | 6329      | 385651    | 1636984   | 20.39     |
| 60-64      | 60       | 5        | 0.5       | 1665000    | 42353        | 0.025437  | 0.119581  | 0.880419  | 73966     | 8845      | 347717    | 1251333   | 16.92     |
| 65-69      | 65       | 5        | 0.5       | 1287000    | 44306        | 0.034426  | 0.158488  | 0.841512  | 65121     | 10321     | 299802    | 903615.9  | 13.88     |
| 70-74      | 70       | 5        | 0.5       | 939000     | 44560        | 0.047454  | 0.212108  | 0.787892  | 54800     | 11624     | 244941    | 603813.6  | 11.02     |
| 75-79      | 75       | 5        | 0.5       | 595000     | 39627        | 0.0666    | 0.285469  | 0.714531  | 43177     | 12326     | 185069    | 358872.2  | 8.31      |
| 80-85      | 80       | 5        | 0.5       | 228990     | 27299        | 0.119216  | 0.459215  | 0.540785  | 30851     | 14167     | 118837    | 173803.5  | 5.63      |
| 85+        | 85       | 0        | 0.5       | 114495     | 34752        | 0.303523  | 1         | 0         | 16684     | 16684     | 54967     | 54966.92  | 3.29      |
| All ages   |          |          |           | 38004485   | 386602       |           |           |           |           |           |           |           |           |

**TAMIL NADU**

Estimated abridged life table for 2019

**FEMALES**

| <i>Age</i> | <i>x</i> | <i>n</i> | <i>ax</i> | <i>pop</i> | <i>death</i> | <i>Mx</i> | <i>qx</i> | <i>px</i> | <i>lx</i> | <i>dx</i> | <i>Lx</i> | <i>Tx</i> | <i>ex</i> |
|------------|----------|----------|-----------|------------|--------------|-----------|-----------|-----------|-----------|-----------|-----------|-----------|-----------|
| <1         | 0        | 1        | 0.1       | 456000     | 6599         | 0.014471  | 0.014285  | 0.985715  | 100000    | 1429      | 98714     | 7393208   | 73.93     |
| 1-4        | 1        | 4        | 0.5       | 1806000    | 1288         | 0.000713  | 0.002849  | 0.997151  | 98571     | 281       | 393724    | 7294494   | 74.00     |
| 5-9        | 5        | 5        | 0.5       | 2455000    | 497          | 0.000202  | 0.001011  | 0.998989  | 98291     | 99        | 491205    | 6900770   | 70.21     |
| 10-14      | 10       | 5        | 0.5       | 2575000    | 1097         | 0.000426  | 0.002128  | 0.997872  | 98191     | 209       | 490434    | 6409565   | 65.28     |
| 15-19      | 15       | 5        | 0.5       | 2721000    | 1842         | 0.000677  | 0.003379  | 0.996621  | 97982     | 331       | 489084    | 5919131   | 60.41     |
| 20-24      | 20       | 5        | 0.5       | 2889000    | 3400         | 0.001177  | 0.005868  | 0.994132  | 97651     | 573       | 486824    | 5430048   | 55.61     |
| 25-29      | 25       | 5        | 0.5       | 3029000    | 3192         | 0.001054  | 0.005256  | 0.994744  | 97078     | 510       | 484116    | 4943224   | 50.92     |
| 30-34      | 30       | 5        | 0.5       | 3197000    | 3709         | 0.00116   | 0.005783  | 0.994217  | 96568     | 558       | 481444    | 4459109   | 46.18     |
| 35-39      | 35       | 5        | 0.5       | 3210000    | 6505         | 0.002026  | 0.010081  | 0.989919  | 96010     | 968       | 477628    | 3977665   | 41.43     |
| 40-44      | 40       | 5        | 0.5       | 3019000    | 5275         | 0.001747  | 0.008699  | 0.991301  | 95042     | 827       | 473141    | 3500037   | 36.83     |
| 45-49      | 45       | 5        | 0.5       | 2801000    | 8660         | 0.003092  | 0.015341  | 0.984659  | 94215     | 1445      | 467461    | 3026895   | 32.13     |
| 50-54      | 50       | 5        | 0.5       | 2509000    | 16055        | 0.006399  | 0.031491  | 0.968509  | 92770     | 2921      | 456544    | 2559434   | 27.59     |
| 55-59      | 55       | 5        | 0.5       | 2141000    | 19784        | 0.00924   | 0.045159  | 0.954841  | 89848     | 4057      | 439097    | 2102890   | 23.40     |
| 60-64      | 60       | 5        | 0.5       | 1731000    | 27159        | 0.01569   | 0.075488  | 0.924512  | 85791     | 6476      | 412763    | 1663793   | 19.39     |
| 65-69      | 65       | 5        | 0.5       | 1365000    | 34015        | 0.024919  | 0.117289  | 0.882711  | 79315     | 9303      | 373316    | 1251029   | 15.77     |
| 70-74      | 70       | 5        | 0.5       | 1042000    | 35470        | 0.03404   | 0.156853  | 0.843147  | 70012     | 10982     | 322605    | 877713    | 12.54     |
| 75-79      | 75       | 5        | 0.5       | 687000     | 34365        | 0.050022  | 0.222309  | 0.777691  | 59030     | 13123     | 262344    | 555107.5  | 9.40      |
| 80-85      | 80       | 5        | 0.5       | 229422     | 27660        | 0.120563  | 0.463201  | 0.536799  | 45907     | 21264     | 176376    | 292763.5  | 6.38      |
| 85+        | 85       | 0        | 0.5       | 152948     | 32384        | 0.211732  | 1         | 0         | 24643     | 24643     | 116388    | 116387.7  | 4.72      |
| All ages   |          |          |           | 38015370   | 268955       |           |           |           |           |           |           |           |           |



**TELANGANA**

Estimated abridged life table for 2019

**MALES**

| <i>Age</i> | <i>x</i> | <i>n</i> | <i>ax</i> | <i>pop</i> | <i>death</i> | <i>Mx</i> | <i>qx</i> | <i>px</i> | <i>lx</i> | <i>dx</i> | <i>Lx</i> | <i>Tx</i> | <i>ex</i> |
|------------|----------|----------|-----------|------------|--------------|-----------|-----------|-----------|-----------|-----------|-----------|-----------|-----------|
| <1         | 0        | 1        | 0.1       | 276000     | 7198         | 0.02608   | 0.025481  | 0.974519  | 100000    | 2548      | 97707     | 6942819   | 69.43     |
| 1-4        | 1        | 4        | 0.5       | 1090000    | 991          | 0.000909  | 0.003629  | 0.996371  | 97452     | 354       | 389100    | 6845112   | 70.24     |
| 5-9        | 5        | 5        | 0.5       | 1416000    | 606          | 0.000428  | 0.002137  | 0.997863  | 97098     | 208       | 484972    | 6456012   | 66.49     |
| 10-14      | 10       | 5        | 0.5       | 1458000    | 319          | 0.000219  | 0.001094  | 0.998906  | 96891     | 106       | 484189    | 5971040   | 61.63     |
| 15-19      | 15       | 5        | 0.5       | 1610000    | 503          | 0.000312  | 0.00156   | 0.99844   | 96785     | 151       | 483546    | 5486851   | 56.69     |
| 20-24      | 20       | 5        | 0.5       | 1750000    | 1363         | 0.000779  | 0.003888  | 0.996112  | 96634     | 376       | 482230    | 5003305   | 51.78     |
| 25-29      | 25       | 5        | 0.5       | 1747000    | 1989         | 0.001139  | 0.005677  | 0.994323  | 96258     | 546       | 479924    | 4521076   | 46.97     |
| 30-34      | 30       | 5        | 0.5       | 1671000    | 1461         | 0.000874  | 0.004362  | 0.995638  | 95712     | 417       | 477514    | 4041151   | 42.22     |
| 35-39      | 35       | 5        | 0.5       | 1544000    | 2883         | 0.001867  | 0.009291  | 0.990709  | 95294     | 885       | 474257    | 3563637   | 37.40     |
| 40-44      | 40       | 5        | 0.5       | 1378000    | 3219         | 0.002336  | 0.011614  | 0.988386  | 94409     | 1096      | 469303    | 3089380   | 32.72     |
| 45-49      | 45       | 5        | 0.5       | 1227000    | 6596         | 0.005376  | 0.026522  | 0.973478  | 93312     | 2475      | 460375    | 2620077   | 28.08     |
| 50-54      | 50       | 5        | 0.5       | 1048000    | 5174         | 0.004937  | 0.024384  | 0.975616  | 90837     | 2215      | 448650    | 2159702   | 23.78     |
| 55-59      | 55       | 5        | 0.5       | 834000     | 12378        | 0.014842  | 0.071556  | 0.928444  | 88622     | 6342      | 427259    | 1711052   | 19.31     |
| 60-64      | 60       | 5        | 0.5       | 621000     | 12833        | 0.020665  | 0.098251  | 0.901749  | 82281     | 8084      | 391194    | 1283794   | 15.60     |
| 65-69      | 65       | 5        | 0.5       | 469000     | 59098        | 0.126009  | 0.479113  | 0.520887  | 74197     | 35549     | 282112    | 892599.4  | 12.03     |
| 70-74      | 70       | 5        | 0.5       | 375000     | 11940        | 0.03184   | 0.147462  | 0.852538  | 38648     | 5699      | 178993    | 610487.1  | 15.80     |
| 75-79      | 75       | 5        | 0.5       | 257000     | 8026         | 0.031231  | 0.144847  | 0.855153  | 32949     | 4773      | 152814    | 431494.1  | 13.10     |
| 80-85      | 80       | 5        | 0.5       | 75912      | 6402         | 0.08434   | 0.348269  | 0.651731  | 28176     | 9813      | 116350    | 278680.5  | 9.89      |
| 85+        | 85       | 0        | 0.5       | 37956      | 4294         | 0.113124  | 1         | 0         | 18363     | 18363     | 162331    | 162330.7  | 8.84      |
| All ages   |          |          |           | 18884868   | 147274       |           |           |           |           |           |           |           |           |

**TELANGANA**

Estimated abridged life table for 2019

**FEMALES**

| <i>Age</i> | <i>x</i> | <i>n</i> | <i>ax</i> | <i>pop</i> | <i>death</i> | <i>Mx</i> | <i>qx</i> | <i>px</i> | <i>lx</i> | <i>dx</i> | <i>Lx</i> | <i>Tx</i> | <i>ex</i> |
|------------|----------|----------|-----------|------------|--------------|-----------|-----------|-----------|-----------|-----------|-----------|-----------|-----------|
| <1         | 0        | 1        | 0.1       | 251000     | 6856         | 0.027314  | 0.026659  | 0.973341  | 100000    | 2666      | 97601     | 7383780   | 73.84     |
| 1-4        | 1        | 4        | 0.5       | 988000     | 854          | 0.000865  | 0.003453  | 0.996547  | 97334     | 336       | 388664    | 7286180   | 74.86     |
| 5-9        | 5        | 5        | 0.5       | 1265000    | 293          | 0.000231  | 0.001156  | 0.998844  | 96998     | 112       | 484710    | 6897515   | 71.11     |
| 10-14      | 10       | 5        | 0.5       | 1373000    | 401          | 0.000292  | 0.001461  | 0.998539  | 96886     | 142       | 484076    | 6412805   | 66.19     |
| 15-19      | 15       | 5        | 0.5       | 1514000    | 607          | 0.000401  | 0.002003  | 0.997997  | 96744     | 194       | 483238    | 5928729   | 61.28     |
| 20-24      | 20       | 5        | 0.5       | 1644000    | 826          | 0.000502  | 0.002509  | 0.997491  | 96551     | 242       | 482148    | 5445492   | 56.40     |
| 25-29      | 25       | 5        | 0.5       | 1669000    | 1314         | 0.000787  | 0.003927  | 0.996073  | 96308     | 378       | 480597    | 4963344   | 51.54     |
| 30-34      | 30       | 5        | 0.5       | 1679000    | 1055         | 0.000629  | 0.003138  | 0.996862  | 95930     | 301       | 478898    | 4482747   | 46.73     |
| 35-39      | 35       | 5        | 0.5       | 1604000    | 1614         | 0.001006  | 0.005019  | 0.994981  | 95629     | 480       | 476946    | 4003849   | 41.87     |
| 40-44      | 40       | 5        | 0.5       | 1426000    | 2762         | 0.001937  | 0.009637  | 0.990363  | 95149     | 917       | 473453    | 3526903   | 37.07     |
| 45-49      | 45       | 5        | 0.5       | 1244000    | 4783         | 0.003845  | 0.019043  | 0.980957  | 94232     | 1794      | 466675    | 3053450   | 32.40     |
| 50-54      | 50       | 5        | 0.5       | 1034000    | 4228         | 0.004089  | 0.020236  | 0.979764  | 92438     | 1871      | 457512    | 2586775   | 27.98     |
| 55-59      | 55       | 5        | 0.5       | 825000     | 6386         | 0.007741  | 0.037971  | 0.962029  | 90567     | 3439      | 444239    | 2129263   | 23.51     |
| 60-64      | 60       | 5        | 0.5       | 655000     | 10741        | 0.016398  | 0.07876   | 0.92124   | 87128     | 6862      | 418486    | 1685024   | 19.34     |
| 65-69      | 65       | 5        | 0.5       | 548000     | 44239        | 0.080728  | 0.335858  | 0.664142  | 80266     | 26958     | 333935    | 1266538   | 15.78     |
| 70-74      | 70       | 5        | 0.5       | 458000     | 10705        | 0.023374  | 0.110417  | 0.889583  | 53308     | 5886      | 251825    | 932603    | 17.49     |
| 75-79      | 75       | 5        | 0.5       | 305000     | 6644         | 0.021783  | 0.103292  | 0.896708  | 47422     | 4898      | 224864    | 680778.2  | 14.36     |
| 80-85      | 80       | 5        | 0.5       | 74988      | 4763         | 0.063516  | 0.274061  | 0.725939  | 42524     | 11654     | 183483    | 455914.4  | 10.72     |
| 85+        | 85       | 0        | 0.5       | 56241      | 6373         | 0.113311  | 1         | 0         | 30870     | 30870     | 272431    | 272431.4  | 8.83      |
| All ages   |          |          |           | 18613229   | 115444       |           |           |           |           |           |           |           |           |

## TRIPURA

Estimated abridged life table for 2019

## MALES

| Age      | <i>x</i> | <i>n</i> | <i>ax</i> | <i>pop</i> | <i>death</i> | <i>Mx</i> | <i>qx</i> | <i>px</i> | <i>lx</i> | <i>dx</i> | <i>Lx</i> | <i>Tx</i> | <i>ex</i> |
|----------|----------|----------|-----------|------------|--------------|-----------|-----------|-----------|-----------|-----------|-----------|-----------|-----------|
| <1       | 0        | 1        | 0.1       | 36628      | 1467         | 0.040043  | 0.03865   | 0.96135   | 100000    | 3865      | 96521     | 6292420   | 62.92     |
| 1-4      | 1        | 4        | 0.5       | 145110     | 175          | 0.001209  | 0.004824  | 0.995176  | 96135     | 464       | 383612    | 6195899   | 64.45     |
| 5-9      | 5        | 5        | 0.5       | 185822     | 48           | 0.000257  | 0.001283  | 0.998717  | 95671     | 123       | 478049    | 5812286   | 60.75     |
| 10-14    | 10       | 5        | 0.5       | 204200     | 58           | 0.000286  | 0.001427  | 0.998573  | 95548     | 136       | 477402    | 5334237   | 55.83     |
| 15-19    | 15       | 5        | 0.5       | 200116     | 180          | 0.000902  | 0.004498  | 0.995502  | 95412     | 429       | 475988    | 4856835   | 50.90     |
| 20-24    | 20       | 5        | 0.5       | 206242     | 221          | 0.001069  | 0.005333  | 0.994667  | 94983     | 507       | 473649    | 4380848   | 46.12     |
| 25-29    | 25       | 5        | 0.5       | 193990     | 370          | 0.001909  | 0.0095    | 0.9905    | 94476     | 898       | 470138    | 3907199   | 41.36     |
| 30-34    | 30       | 5        | 0.5       | 177654     | 453          | 0.002548  | 0.012659  | 0.987341  | 93579     | 1185      | 464933    | 3437060   | 36.73     |
| 35-39    | 35       | 5        | 0.5       | 151108     | 618          | 0.004089  | 0.020237  | 0.979763  | 92394     | 1870      | 457297    | 2972127   | 32.17     |
| 40-44    | 40       | 5        | 0.5       | 134772     | 755          | 0.005603  | 0.027629  | 0.972371  | 90525     | 2501      | 446370    | 2514830   | 27.78     |
| 45-49    | 45       | 5        | 0.5       | 112310     | 1206         | 0.010738  | 0.052287  | 0.947713  | 88023     | 4602      | 428611    | 2068461   | 23.50     |
| 50-54    | 50       | 5        | 0.5       | 87806      | 1474         | 0.016787  | 0.080554  | 0.919446  | 83421     | 6720      | 400305    | 1639850   | 19.66     |
| 55-59    | 55       | 5        | 0.5       | 67386      | 1759         | 0.026097  | 0.122495  | 0.877505  | 76701     | 9395      | 360016    | 1239545   | 16.16     |
| 60-64    | 60       | 5        | 0.5       | 51050      | 2149         | 0.042104  | 0.19047   | 0.80953   | 67306     | 12820     | 304478    | 879528.4  | 13.07     |
| 65-69    | 65       | 5        | 0.5       | 36756      | 2060         | 0.056045  | 0.245788  | 0.754212  | 54486     | 13392     | 238949    | 575050    | 10.55     |
| 70-74    | 70       | 5        | 0.5       | 24504      | 2254         | 0.091979  | 0.373915  | 0.626085  | 41094     | 15366     | 167055    | 336100.8  | 8.18      |
| 75-79    | 75       | 5        | 0.5       | 14294      | 1724         | 0.120578  | 0.463246  | 0.536754  | 25728     | 11919     | 98845     | 169045.6  | 6.57      |
| 80-85    | 80       | 5        | 0.5       | 8168       | 1061         | 0.129853  | 0.490148  | 0.509852  | 13810     | 6769      | 52127     | 70200.7   | 5.08      |
| 85+      | 85       | 0        | 0.5       | 4084       | 1591         | 0.389559  | 1         | 0         | 7041      | 7041      | 18074     | 18074.08  | 2.57      |
| All ages |          |          |           | 2042000    | 19622        |           |           |           |           |           |           |           |           |

## TRIPURA

Estimated abridged life table for 2019

## FEMALES

| Age      | <i>x</i> | <i>n</i> | <i>ax</i> | <i>pop</i> | <i>death</i> | <i>Mx</i> | <i>qx</i> | <i>px</i> | <i>lx</i> | <i>dx</i> | <i>Lx</i> | <i>Tx</i> | <i>ex</i> |
|----------|----------|----------|-----------|------------|--------------|-----------|-----------|-----------|-----------|-----------|-----------|-----------|-----------|
| <1       | 0        | 1        | 0.1       | 34154      | 1310         | 0.038348  | 0.037069  | 0.962931  | 100000    | 3707      | 96664     | 6689932   | 66.90     |
| 1-4      | 1        | 4        | 0.5       | 135266     | 219          | 0.001619  | 0.006457  | 0.993543  | 96293     | 622       | 383929    | 6593269   | 68.47     |
| 5-9      | 5        | 5        | 0.5       | 175330     | 54           | 0.000305  | 0.001526  | 0.998474  | 95671     | 146       | 477992    | 6209340   | 64.90     |
| 10-14    | 10       | 5        | 0.5       | 191090     | 65           | 0.000343  | 0.001711  | 0.998289  | 95525     | 163       | 477218    | 5731348   | 60.00     |
| 15-19    | 15       | 5        | 0.5       | 198970     | 135          | 0.000678  | 0.003387  | 0.996613  | 95362     | 323       | 476002    | 5254129   | 55.10     |
| 20-24    | 20       | 5        | 0.5       | 226550     | 165          | 0.000728  | 0.003635  | 0.996365  | 95039     | 345       | 474331    | 4778127   | 50.28     |
| 25-29    | 25       | 5        | 0.5       | 204880     | 234          | 0.001142  | 0.005694  | 0.994306  | 94694     | 539       | 472120    | 4303795   | 45.45     |
| 30-34    | 30       | 5        | 0.5       | 179270     | 286          | 0.001595  | 0.007945  | 0.992055  | 94154     | 748       | 468901    | 3831676   | 40.70     |
| 35-39    | 35       | 5        | 0.5       | 145780     | 330          | 0.002266  | 0.011265  | 0.988735  | 93406     | 1052      | 464401    | 3362775   | 36.00     |
| 40-44    | 40       | 5        | 0.5       | 120170     | 404          | 0.003359  | 0.016657  | 0.983343  | 92354     | 1538      | 457924    | 2898374   | 31.38     |
| 45-49    | 45       | 5        | 0.5       | 96530      | 603          | 0.006251  | 0.030776  | 0.969224  | 90816     | 2795      | 447091    | 2440450   | 26.87     |
| 50-54    | 50       | 5        | 0.5       | 72890      | 738          | 0.010119  | 0.049345  | 0.950655  | 88021     | 4343      | 429245    | 1993359   | 22.65     |
| 55-59    | 55       | 5        | 0.5       | 68950      | 928          | 0.013458  | 0.065098  | 0.934902  | 83677     | 5447      | 404769    | 1564114   | 18.69     |
| 60-64    | 60       | 5        | 0.5       | 45310      | 1134         | 0.02503   | 0.117779  | 0.882221  | 78230     | 9214      | 368116    | 1159345   | 14.82     |
| 65-69    | 65       | 5        | 0.5       | 31520      | 1361         | 0.043179  | 0.19486   | 0.80514   | 69016     | 13449     | 311460    | 791229    | 11.46     |
| 70-74    | 70       | 5        | 0.5       | 19700      | 1767         | 0.089677  | 0.366271  | 0.633729  | 55568     | 20353     | 226957    | 479769.1  | 8.63      |
| 75-79    | 75       | 5        | 0.5       | 13790      | 1351         | 0.097967  | 0.393467  | 0.606533  | 35215     | 13856     | 141435    | 252812.4  | 7.18      |
| 80-85    | 80       | 5        | 0.5       | 5910       | 831          | 0.14067   | 0.520355  | 0.479645  | 21359     | 11114     | 79009     | 111377.6  | 5.21      |
| 85+      | 85       | 0        | 0.5       | 3940       | 1247         | 0.316508  | 1         | 0         | 10245     | 10245     | 32368     | 32368.12  | 3.16      |
| All ages |          |          |           | 1970000    | 13162        |           |           |           |           |           |           |           |           |

**UTTAR PRADESH**

Estimated abridged life table for 2019

**MALES**

| <i>Age</i> | <i>x</i> | <i>n</i> | <i>ax</i> | <i>pop</i> | <i>death</i> | <i>Mx</i> | <i>qx</i> | <i>px</i> | <i>lx</i> | <i>dx</i> | <i>Lx</i> | <i>Tx</i> | <i>ex</i> |
|------------|----------|----------|-----------|------------|--------------|-----------|-----------|-----------|-----------|-----------|-----------|-----------|-----------|
| <1         | 0        | 1        | 0.1       | 2592000    | 46573        | 0.017968  | 0.017682  | 0.982318  | 100000    | 1768      | 98409     | 6633166   | 66.33     |
| 1-4        | 1        | 4        | 0.5       | 10028000   | 73545        | 0.007334  | 0.028912  | 0.971088  | 98232     | 2840      | 387247    | 6534757   | 66.52     |
| 5-9        | 5        | 5        | 0.5       | 12912000   | 2567         | 0.000199  | 0.000993  | 0.999007  | 95392     | 95        | 476722    | 6147510   | 64.44     |
| 10-14      | 10       | 5        | 0.5       | 11299000   | 16305        | 0.001443  | 0.007189  | 0.992811  | 95297     | 685       | 474772    | 5670788   | 59.51     |
| 15-19      | 15       | 5        | 0.5       | 12422000   | 12513        | 0.001007  | 0.005024  | 0.994976  | 94612     | 475       | 471871    | 5196016   | 54.92     |
| 20-24      | 20       | 5        | 0.5       | 12773000   | 13693        | 0.001072  | 0.005346  | 0.994654  | 94137     | 503       | 469425    | 4724145   | 50.18     |
| 25-29      | 25       | 5        | 0.5       | 11424000   | 18278        | 0.0016    | 0.007968  | 0.992032  | 93633     | 746       | 466301    | 4254721   | 45.44     |
| 30-34      | 30       | 5        | 0.5       | 9236000    | 22166        | 0.0024    | 0.011928  | 0.988072  | 92887     | 1108      | 461666    | 3788420   | 40.79     |
| 35-39      | 35       | 5        | 0.5       | 7336000    | 21274        | 0.0029    | 0.014396  | 0.985604  | 91779     | 1321      | 455593    | 3326754   | 36.25     |
| 40-44      | 40       | 5        | 0.5       | 6345000    | 32994        | 0.0052    | 0.025666  | 0.974334  | 90458     | 2322      | 446486    | 2871161   | 31.74     |
| 45-49      | 45       | 5        | 0.5       | 5787000    | 30092        | 0.0052    | 0.025666  | 0.974334  | 88136     | 2262      | 435026    | 2424675   | 27.51     |
| 50-54      | 50       | 5        | 0.5       | 4981000    | 42339        | 0.0085    | 0.041616  | 0.958384  | 85874     | 3574      | 420436    | 1989649   | 23.17     |
| 55-59      | 55       | 5        | 0.5       | 3974000    | 85838        | 0.0216    | 0.102467  | 0.897533  | 82300     | 8433      | 390419    | 1569213   | 19.07     |
| 60-64      | 60       | 5        | 0.5       | 3012000    | 82228        | 0.0273    | 0.127779  | 0.872221  | 73867     | 9439      | 345740    | 1178793   | 15.96     |
| 65-69      | 65       | 5        | 0.5       | 2285000    | 97113        | 0.0425    | 0.19209   | 0.80791   | 64429     | 12376     | 291203    | 833053.2  | 12.93     |
| 70-74      | 70       | 5        | 0.5       | 1780000    | 116768       | 0.0656    | 0.281787  | 0.718213  | 52053     | 14668     | 223593    | 541850.3  | 10.41     |
| 75-79      | 75       | 5        | 0.5       | 1199000    | 82012        | 0.0684    | 0.292058  | 0.707942  | 37385     | 10919     | 159628    | 318256.9  | 8.51      |
| 80-85      | 80       | 5        | 0.5       | 361032     | 47981        | 0.1329    | 0.49878   | 0.50122   | 26466     | 13201     | 99329     | 158629.3  | 5.99      |
| 85+        | 85       | 0        | 0.5       | 240688     | 53842        | 0.2237    | 1         | 0         | 13265     | 13265     | 59300     | 59300.03  | 4.47      |
| All ages   |          |          |           | 119986720  | 898121       |           |           |           |           |           |           |           |           |

**UTTAR PRADESH**

Estimated abridged life table for 2019

**FEMALES**

| <i>Age</i> | <i>x</i> | <i>n</i> | <i>ax</i> | <i>pop</i> | <i>death</i> | <i>Mx</i> | <i>qx</i> | <i>px</i> | <i>lx</i> | <i>dx</i> | <i>Lx</i> | <i>Tx</i> | <i>ex</i> |
|------------|----------|----------|-----------|------------|--------------|-----------|-----------|-----------|-----------|-----------|-----------|-----------|-----------|
| <1         | 0        | 1        | 0.1       | 2300000    | 41925        | 0.018228  | 0.017934  | 0.982066  | 100000    | 1793      | 98386     | 6821610   | 68.22     |
| 1-4        | 1        | 4        | 0.5       | 8825000    | 68785        | 0.007794  | 0.030699  | 0.969301  | 98207     | 3015      | 386797    | 6723224   | 68.46     |
| 5-9        | 5        | 5        | 0.5       | 11218000   | 7888         | 0.000703  | 0.00351   | 0.99649   | 95192     | 334       | 475124    | 6336427   | 66.56     |
| 10-14      | 10       | 5        | 0.5       | 10296000   | 7075         | 0.000687  | 0.00343   | 0.99657   | 94858     | 325       | 473475    | 5861304   | 61.79     |
| 15-19      | 15       | 5        | 0.5       | 11144000   | 10836        | 0.000972  | 0.00485   | 0.99515   | 94532     | 458       | 471515    | 5387829   | 56.99     |
| 20-24      | 20       | 5        | 0.5       | 11213000   | 12334        | 0.0011    | 0.005485  | 0.994515  | 94074     | 516       | 469079    | 4916313   | 52.26     |
| 25-29      | 25       | 5        | 0.5       | 9971000    | 14053        | 0.001409  | 0.007022  | 0.992978  | 93558     | 657       | 466147    | 4447234   | 47.53     |
| 30-34      | 30       | 5        | 0.5       | 8301000    | 14507        | 0.001748  | 0.0087    | 0.9913    | 92901     | 808       | 462484    | 3981087   | 42.85     |
| 35-39      | 35       | 5        | 0.5       | 7057000    | 16347        | 0.002316  | 0.011516  | 0.988484  | 92093     | 1061      | 457812    | 3518603   | 38.21     |
| 40-44      | 40       | 5        | 0.5       | 6423000    | 25050        | 0.0039    | 0.019312  | 0.980688  | 91032     | 1758      | 450766    | 3060791   | 33.62     |
| 45-49      | 45       | 5        | 0.5       | 5756000    | 29931        | 0.0052    | 0.025666  | 0.974334  | 89274     | 2291      | 440642    | 2610026   | 29.24     |
| 50-54      | 50       | 5        | 0.5       | 4777000    | 53502        | 0.0112    | 0.054475  | 0.945525  | 86983     | 4738      | 423068    | 2169383   | 24.94     |
| 55-59      | 55       | 5        | 0.5       | 3747000    | 62200        | 0.0166    | 0.079693  | 0.920307  | 82244     | 6554      | 394837    | 1746315   | 21.23     |
| 60-64      | 60       | 5        | 0.5       | 2925000    | 56160        | 0.0192    | 0.091603  | 0.908397  | 75690     | 6933      | 361117    | 1351479   | 17.86     |
| 65-69      | 65       | 5        | 0.5       | 2421000    | 76988        | 0.0318    | 0.14729   | 0.85271   | 68757     | 10127     | 318466    | 990361.4  | 14.40     |
| 70-74      | 70       | 5        | 0.5       | 1944000    | 103810       | 0.0534    | 0.235554  | 0.764446  | 58630     | 13810     | 258622    | 671895.8  | 11.46     |
| 75-79      | 75       | 5        | 0.5       | 1258000    | 75983        | 0.0604    | 0.262381  | 0.737619  | 44819     | 11760     | 194696    | 413274.2  | 9.22      |
| 80-85      | 80       | 5        | 0.5       | 331689     | 43120        | 0.13      | 0.490566  | 0.509434  | 33059     | 16218     | 124753    | 218577.8  | 6.61      |
| 85+        | 85       | 0        | 0.5       | 221126     | 39692        | 0.1795    | 1         | 0         | 16842     | 16842     | 93825     | 93825.12  | 5.57      |
| All ages   |          |          |           | 110128815  | 760186       |           |           |           |           |           |           |           |           |

## UTTARAKHAND

## Estimated abridged life table for 2019

## MALES

| Age      | <i>x</i> | <i>n</i> | <i>ax</i> | <i>pop</i> | <i>death</i> | <i>Mx</i> | <i>qx</i> | <i>px</i> | <i>lx</i> | <i>dx</i> | <i>Lx</i> | <i>Tx</i> | <i>ex</i> |
|----------|----------|----------|-----------|------------|--------------|-----------|-----------|-----------|-----------|-----------|-----------|-----------|-----------|
| <1       | 0        | 1        | 0.1       | 95000      | 2672         | 0.028121  | 0.027427  | 0.972573  | 100000    | 2743      | 97532     | 6838323   | 68.38     |
| 1-4      | 1        | 4        | 0.5       | 373000     | 634          | 0.001699  | 0.006772  | 0.993228  | 97257     | 659       | 387712    | 6740791   | 69.31     |
| 5-9      | 5        | 5        | 0.5       | 474000     | 54           | 0.000113  | 0.000567  | 0.999433  | 96599     | 55        | 482856    | 6353079   | 65.77     |
| 10-14    | 10       | 5        | 0.5       | 517000     | 336          | 0.00065   | 0.003246  | 0.996754  | 96544     | 313       | 481936    | 5870223   | 60.80     |
| 15-19    | 15       | 5        | 0.5       | 564000     | 612          | 0.001086  | 0.005415  | 0.994585  | 96231     | 521       | 479850    | 5388287   | 55.99     |
| 20-24    | 20       | 5        | 0.5       | 603000     | 478          | 0.000793  | 0.003958  | 0.996042  | 95709     | 379       | 477600    | 4908436   | 51.28     |
| 25-29    | 25       | 5        | 0.5       | 577000     | 509          | 0.000882  | 0.004398  | 0.995602  | 95331     | 419       | 475605    | 4430836   | 46.48     |
| 30-34    | 30       | 5        | 0.5       | 494000     | 1102         | 0.002231  | 0.011091  | 0.988909  | 94911     | 1053      | 471925    | 3955231   | 41.67     |
| 35-39    | 35       | 5        | 0.5       | 408000     | 1318         | 0.003229  | 0.016017  | 0.983983  | 93859     | 1503      | 465535    | 3483306   | 37.11     |
| 40-44    | 40       | 5        | 0.5       | 352000     | 1222         | 0.003472  | 0.017212  | 0.982788  | 92355     | 1590      | 457803    | 3017771   | 32.68     |
| 45-49    | 45       | 5        | 0.5       | 316000     | 2519         | 0.007971  | 0.039075  | 0.960925  | 90766     | 3547      | 444962    | 2559968   | 28.20     |
| 50-54    | 50       | 5        | 0.5       | 274000     | 1978         | 0.007218  | 0.035449  | 0.964551  | 87219     | 3092      | 428366    | 2115007   | 24.25     |
| 55-59    | 55       | 5        | 0.5       | 226000     | 3305         | 0.014624  | 0.070542  | 0.929458  | 84127     | 5935      | 405800    | 1686641   | 20.05     |
| 60-64    | 60       | 5        | 0.5       | 176000     | 4476         | 0.025432  | 0.119558  | 0.880442  | 78193     | 9349      | 367592    | 1280841   | 16.38     |
| 65-69    | 65       | 5        | 0.5       | 136000     | 4662         | 0.034282  | 0.157879  | 0.842121  | 68844     | 10869     | 317048    | 913249.4  | 13.27     |
| 70-74    | 70       | 5        | 0.5       | 110000     | 7189         | 0.065357  | 0.280889  | 0.719111  | 57975     | 16285     | 249164    | 596201.3  | 10.28     |
| 75-79    | 75       | 5        | 0.5       | 75000      | 5839         | 0.077854  | 0.325847  | 0.674153  | 41691     | 13585     | 174491    | 347037.1  | 8.32      |
| 80-85    | 80       | 5        | 0.5       | 29200      | 3349         | 0.114703  | 0.445706  | 0.554294  | 28106     | 12527     | 109212    | 172546.4  | 6.14      |
| 85+      | 85       | 0        | 0.5       | 17520      | 4310         | 0.245976  | 1         | 0         | 15579     | 15579     | 63335     | 63334.78  | 4.07      |
| All ages |          |          |           | 5816720    | 46563        |           |           |           |           |           |           |           |           |

## UTTARAKHAND

Estimated abridged life table for 2019

## FEMALES

| Age      | <i>x</i> | <i>n</i> | <i>ax</i> | <i>pop</i> | <i>death</i> | <i>Mx</i> | <i>qx</i> | <i>px</i> | <i>lx</i> | <i>dx</i> | <i>Lx</i> | <i>Tx</i> | <i>ex</i> |
|----------|----------|----------|-----------|------------|--------------|-----------|-----------|-----------|-----------|-----------|-----------|-----------|-----------|
| <1       | 0        | 1        | 0.1       | 81000      | 2039         | 0.025175  | 0.024617  | 0.975383  | 100000    | 2462      | 97784     | 7352218   | 73.52     |
| 1-4      | 1        | 4        | 0.5       | 320000     | 611          | 0.00191   | 0.007611  | 0.992389  | 97538     | 742       | 388668    | 7254434   | 74.38     |
| 5-9      | 5        | 5        | 0.5       | 394000     | 211          | 0.000535  | 0.002671  | 0.997329  | 96796     | 259       | 483333    | 6865765   | 70.93     |
| 10-14    | 10       | 5        | 0.5       | 454000     | 122          | 0.00027   | 0.001347  | 0.998653  | 96537     | 130       | 482362    | 6382432   | 66.11     |
| 15-19    | 15       | 5        | 0.5       | 501000     | 513          | 0.001023  | 0.005103  | 0.994897  | 96407     | 492       | 480807    | 5900070   | 61.20     |
| 20-24    | 20       | 5        | 0.5       | 547000     | 256          | 0.000468  | 0.002338  | 0.997662  | 95915     | 224       | 479017    | 5419263   | 56.50     |
| 25-29    | 25       | 5        | 0.5       | 538000     | 431          | 0.000801  | 0.003998  | 0.996002  | 95691     | 383       | 477499    | 4940247   | 51.63     |
| 30-34    | 30       | 5        | 0.5       | 482000     | 410          | 0.00085   | 0.004242  | 0.995758  | 95309     | 404       | 475532    | 4462747   | 46.82     |
| 35-39    | 35       | 5        | 0.5       | 415000     | 624          | 0.001503  | 0.007486  | 0.992514  | 94904     | 710       | 472745    | 3987215   | 42.01     |
| 40-44    | 40       | 5        | 0.5       | 360000     | 623          | 0.001729  | 0.00861   | 0.99139   | 94194     | 811       | 468941    | 3514470   | 37.31     |
| 45-49    | 45       | 5        | 0.5       | 320000     | 754          | 0.002357  | 0.011714  | 0.988286  | 93383     | 1094      | 464179    | 3045529   | 32.61     |
| 50-54    | 50       | 5        | 0.5       | 276000     | 1391         | 0.005041  | 0.024891  | 0.975109  | 92289     | 2297      | 455702    | 2581349   | 27.97     |
| 55-59    | 55       | 5        | 0.5       | 229000     | 1905         | 0.008318  | 0.040744  | 0.959256  | 89992     | 3667      | 440792    | 2125648   | 23.62     |
| 60-64    | 60       | 5        | 0.5       | 185000     | 2356         | 0.012734  | 0.061706  | 0.938294  | 86325     | 5327      | 418309    | 1684856   | 19.52     |
| 65-69    | 65       | 5        | 0.5       | 155000     | 2990         | 0.019292  | 0.092023  | 0.907977  | 80998     | 7454      | 386357    | 1266547   | 15.64     |
| 70-74    | 70       | 5        | 0.5       | 127000     | 4627         | 0.036432  | 0.166955  | 0.833045  | 73545     | 12279     | 337027    | 880189.5  | 11.97     |
| 75-79    | 75       | 5        | 0.5       | 87000      | 5028         | 0.057797  | 0.252501  | 0.747499  | 61266     | 15470     | 267656    | 543162.9  | 8.87      |
| 80-85    | 80       | 5        | 0.5       | 38920      | 3650         | 0.093773  | 0.379822  | 0.620178  | 45796     | 17394     | 185495    | 275507.3  | 6.02      |
| 85+      | 85       | 0        | 0.5       | 16680      | 5263         | 0.315534  | 1         | 0         | 28402     | 28402     | 90012     | 90012.1   | 3.17      |
| All ages |          |          |           | 5526600    | 33804        |           |           |           |           |           |           |           |           |



**WEST BENGAL**

Estimated abridged life table for 2019

**MALES**

| <i>Age</i> | <i>x</i> | <i>n</i> | <i>ax</i> | <i>pop</i> | <i>death</i> | <i>Mx</i> | <i>qx</i> | <i>px</i> | <i>lx</i> | <i>dx</i> | <i>Lx</i> | <i>Tx</i> | <i>ex</i> |
|------------|----------|----------|-----------|------------|--------------|-----------|-----------|-----------|-----------|-----------|-----------|-----------|-----------|
| <1         | 0        | 1        | 0.1       | 662000     | 16122        | 0.024354  | 0.023832  | 0.976168  | 100000    | 2383      | 97855     | 7066028   | 70.66     |
| 1-4        | 1        | 4        | 0.5       | 2617000    | 1511         | 0.000577  | 0.002307  | 0.997693  | 97617     | 225       | 390017    | 6968173   | 71.38     |
| 5-9        | 5        | 5        | 0.5       | 3501000    | 765          | 0.000218  | 0.001092  | 0.998908  | 97392     | 106       | 486693    | 6578156   | 67.54     |
| 10-14      | 10       | 5        | 0.5       | 3814000    | 935          | 0.000245  | 0.001225  | 0.998775  | 97285     | 119       | 486129    | 6091463   | 62.61     |
| 15-19      | 15       | 5        | 0.5       | 4171000    | 3103         | 0.000744  | 0.003712  | 0.996288  | 97166     | 361       | 484929    | 5605334   | 57.69     |
| 20-24      | 20       | 5        | 0.5       | 4505000    | 3792         | 0.000842  | 0.0042    | 0.9958    | 96805     | 407       | 483011    | 5120405   | 52.89     |
| 25-29      | 25       | 5        | 0.5       | 4551000    | 6586         | 0.001447  | 0.007209  | 0.992791  | 96399     | 695       | 480257    | 4637394   | 48.11     |
| 30-34      | 30       | 5        | 0.5       | 4318000    | 8049         | 0.001864  | 0.009277  | 0.990723  | 95704     | 888       | 476300    | 4157137   | 43.44     |
| 35-39      | 35       | 5        | 0.5       | 3902000    | 10038        | 0.002573  | 0.012781  | 0.987219  | 94816     | 1212      | 471051    | 3680837   | 38.82     |
| 40-44      | 40       | 5        | 0.5       | 3520000    | 12269        | 0.003486  | 0.017277  | 0.982723  | 93604     | 1617      | 463978    | 3209787   | 34.29     |
| 45-49      | 45       | 5        | 0.5       | 3301000    | 20723        | 0.006278  | 0.030904  | 0.969096  | 91987     | 2843      | 452828    | 2745809   | 29.85     |
| 50-54      | 50       | 5        | 0.5       | 3022000    | 25328        | 0.008381  | 0.041046  | 0.958954  | 89144     | 3659      | 436574    | 2292981   | 25.72     |
| 55-59      | 55       | 5        | 0.5       | 2574000    | 36361        | 0.014126  | 0.068222  | 0.931778  | 85485     | 5832      | 412846    | 1856407   | 21.72     |
| 60-64      | 60       | 5        | 0.5       | 2021000    | 44441        | 0.02199   | 0.104219  | 0.895781  | 79653     | 8301      | 377513    | 1443560   | 18.12     |
| 65-69      | 65       | 5        | 0.5       | 1466000    | 45874        | 0.031292  | 0.145108  | 0.854892  | 71352     | 10354     | 330875    | 1066047   | 14.94     |
| 70-74      | 70       | 5        | 0.5       | 1005000    | 45021        | 0.044797  | 0.201428  | 0.798572  | 60998     | 12287     | 274274    | 735172.3  | 12.05     |
| 75-79      | 75       | 5        | 0.5       | 620000     | 34428        | 0.055529  | 0.2438    | 0.7562    | 48711     | 11876     | 213868    | 460898.1  | 9.46      |
| 80-85      | 80       | 5        | 0.5       | 200380     | 21186        | 0.105731  | 0.418133  | 0.581867  | 36836     | 15402     | 145673    | 247030.5  | 6.71      |
| 85+        | 85       | 0        | 0.5       | 150285     | 31780        | 0.211463  | 1         | 0         | 21433     | 21433     | 101358    | 101357.9  | 4.73      |
| All ages   |          |          |           | 49920665   | 368312       |           |           |           |           |           |           |           |           |

**WEST BENGAL**

Estimated abridged life table for 2019

**FEMALES**

| <i>Age</i> | <i>x</i> | <i>n</i> | <i>ax</i> | <i>pop</i> | <i>death</i> | <i>Mx</i> | <i>qx</i> | <i>px</i> | <i>lx</i> | <i>dx</i> | <i>Lx</i> | <i>Tx</i> | <i>ex</i> |
|------------|----------|----------|-----------|------------|--------------|-----------|-----------|-----------|-----------|-----------|-----------|-----------|-----------|
| <1         | 0        | 1        | 0.1       | 621000     | 14692        | 0.023659  | 0.023165  | 0.976835  | 100000    | 2317      | 97915     | 7388706   | 73.89     |
| 1-4        | 1        | 4        | 0.5       | 2456000    | 1827         | 0.000744  | 0.002972  | 0.997028  | 97683     | 290       | 390153    | 7290790   | 74.64     |
| 5-9        | 5        | 5        | 0.5       | 3283000    | 733          | 0.000223  | 0.001116  | 0.998884  | 97393     | 109       | 486694    | 6900637   | 70.85     |
| 10-14      | 10       | 5        | 0.5       | 3698000    | 896          | 0.000242  | 0.001211  | 0.998789  | 97284     | 118       | 486128    | 6413943   | 65.93     |
| 15-19      | 15       | 5        | 0.5       | 3991000    | 2799         | 0.000701  | 0.0035    | 0.9965    | 97167     | 340       | 484983    | 5927815   | 61.01     |
| 20-24      | 20       | 5        | 0.5       | 4262000    | 3421         | 0.000803  | 0.004005  | 0.995995  | 96827     | 388       | 483163    | 5442832   | 56.21     |
| 25-29      | 25       | 5        | 0.5       | 4308000    | 3736         | 0.000867  | 0.004327  | 0.995673  | 96439     | 417       | 481151    | 4959669   | 51.43     |
| 30-34      | 30       | 5        | 0.5       | 4191000    | 4566         | 0.00109   | 0.005433  | 0.994567  | 96021     | 522       | 478803    | 4478519   | 46.64     |
| 35-39      | 35       | 5        | 0.5       | 3853000    | 5212         | 0.001353  | 0.006741  | 0.993259  | 95500     | 644       | 475889    | 3999715   | 41.88     |
| 40-44      | 40       | 5        | 0.5       | 3489000    | 6371         | 0.001826  | 0.009088  | 0.990912  | 94856     | 862       | 472125    | 3523826   | 37.15     |
| 45-49      | 45       | 5        | 0.5       | 3245000    | 12635        | 0.003894  | 0.019281  | 0.980719  | 93994     | 1812      | 465439    | 3051701   | 32.47     |
| 50-54      | 50       | 5        | 0.5       | 2871000    | 15443        | 0.005379  | 0.026538  | 0.973462  | 92182     | 2446      | 454793    | 2586262   | 28.06     |
| 55-59      | 55       | 5        | 0.5       | 2351000    | 18284        | 0.007777  | 0.038145  | 0.961855  | 89735     | 3423      | 440120    | 2131470   | 23.75     |
| 60-64      | 60       | 5        | 0.5       | 1809000    | 26592        | 0.0147    | 0.070895  | 0.929105  | 86312     | 6119      | 416264    | 1691350   | 19.60     |
| 65-69      | 65       | 5        | 0.5       | 1343000    | 35858        | 0.0267    | 0.125146  | 0.874854  | 80193     | 10036     | 375877    | 1275086   | 15.90     |
| 70-74      | 70       | 5        | 0.5       | 986000     | 36876        | 0.0374    | 0.171011  | 0.828989  | 70157     | 11998     | 320793    | 899208.8  | 12.82     |
| 75-79      | 75       | 5        | 0.5       | 658000     | 42704        | 0.0649    | 0.2792    | 0.7208    | 58160     | 16238     | 250203    | 578415.8  | 9.95      |
| 80-85      | 80       | 5        | 0.5       | 240145     | 23078        | 0.0961    | 0.387422  | 0.612578  | 41922     | 16241     | 169005    | 328212.4  | 7.83      |
| 85+        | 85       | 0        | 0.5       | 144087     | 23241        | 0.1613    | 1         | 0         | 25680     | 25680     | 159208    | 159207.9  | 6.20      |
| All ages   |          |          |           | 47799232   | 278966       |           |           |           |           |           |           |           |           |

## CHANDIGARH

Estimated abridged life table for 2019

## MALES

| Age      | <i>x</i> | <i>n</i> | <i>ax</i> | <i>pop</i> | <i>death</i> | <i>Mx</i> | <i>qx</i> | <i>px</i> | <i>lx</i> | <i>dx</i> | <i>Lx</i> | <i>Tx</i> | <i>ex</i> |
|----------|----------|----------|-----------|------------|--------------|-----------|-----------|-----------|-----------|-----------|-----------|-----------|-----------|
| <1       | 0        | 1        | 0.1       | 7748       | 111          | 0.0143    | 0.014118  | 0.985882  | 100000    | 1412      | 98729     | 7362102   | 73.62     |
| 1-4      | 1        | 4        | 0.5       | 30695      | 46           | 0.0015    | 0.005982  | 0.994018  | 98588     | 590       | 393173    | 7263372   | 73.67     |
| 5-9      | 5        | 5        | 0.5       | 44024      | 18           | 0.0004    | 0.001998  | 0.998002  | 97998     | 196       | 489503    | 6870199   | 70.11     |
| 10-14    | 10       | 5        | 0.5       | 50224      | 25           | 0.0005    | 0.002497  | 0.997503  | 97803     | 244       | 488403    | 6380697   | 65.24     |
| 15-19    | 15       | 5        | 0.5       | 59525      | 42           | 0.0007    | 0.003494  | 0.996506  | 97558     | 341       | 486940    | 5892294   | 60.40     |
| 20-24    | 20       | 5        | 0.5       | 68205      | 34           | 0.0005    | 0.002497  | 0.997503  | 97218     | 243       | 485481    | 5405354   | 55.60     |
| 25-29    | 25       | 5        | 0.5       | 66345      | 66           | 0.001     | 0.004988  | 0.995012  | 96975     | 484       | 483665    | 4919873   | 50.73     |
| 30-34    | 30       | 5        | 0.5       | 57045      | 51           | 0.0009    | 0.00449   | 0.99551   | 96491     | 433       | 481373    | 4436208   | 45.98     |
| 35-39    | 35       | 5        | 0.5       | 46504      | 93           | 0.002     | 0.00995   | 0.99005   | 96058     | 956       | 477900    | 3954836   | 41.17     |
| 40-44    | 40       | 5        | 0.5       | 39683      | 91           | 0.0023    | 0.011434  | 0.988566  | 95102     | 1087      | 472792    | 3476936   | 36.56     |
| 45-49    | 45       | 5        | 0.5       | 34723      | 118          | 0.0034    | 0.016857  | 0.983143  | 94015     | 1585      | 466111    | 3004144   | 31.95     |
| 50-54    | 50       | 5        | 0.5       | 29762      | 190          | 0.0064    | 0.031496  | 0.968504  | 92430     | 2911      | 454872    | 2538032   | 27.46     |
| 55-59    | 55       | 5        | 0.5       | 25422      | 203          | 0.008     | 0.039216  | 0.960784  | 89519     | 3511      | 438817    | 2083161   | 23.27     |
| 60-64    | 60       | 5        | 0.5       | 19222      | 298          | 0.0155    | 0.074609  | 0.925391  | 86008     | 6417      | 413999    | 1644343   | 19.12     |
| 65-69    | 65       | 5        | 0.5       | 14881      | 327          | 0.022     | 0.104265  | 0.895735  | 79591     | 8299      | 377210    | 1230345   | 15.46     |
| 70-74    | 70       | 5        | 0.5       | 11161      | 404          | 0.0362    | 0.165979  | 0.834021  | 71293     | 11833     | 326880    | 853135.2  | 11.97     |
| 75-79    | 75       | 5        | 0.5       | 7441       | 447          | 0.0601    | 0.261248  | 0.738752  | 59460     | 15534     | 258464    | 526254.8  | 8.85      |
| 80-85    | 80       | 5        | 0.5       | 4340       | 281          | 0.0648    | 0.27883   | 0.72117   | 43926     | 12248     | 189010    | 267791.3  | 6.10      |
| 85+      | 85       | 0        | 0.5       | 2480       | 997          | 0.4021    | 1         | 0         | 31678     | 31678     | 78782     | 78781.5   | 2.49      |
| All ages |          |          |           | 619429     | 3844         |           |           |           |           |           |           |           |           |

**CHANDIGARH**

Estimated abridged life table for 2019

**FEMALES**

| <i>Age</i> | <i>x</i> | <i>n</i> | <i>ax</i> | <i>pop</i> | <i>death</i> | <i>Mx</i> | <i>qx</i> | <i>px</i> | <i>lx</i> | <i>dx</i> | <i>Lx</i> | <i>Tx</i> | <i>ex</i> |
|------------|----------|----------|-----------|------------|--------------|-----------|-----------|-----------|-----------|-----------|-----------|-----------|-----------|
| <1         | 0        | 1        | 0.1       | 6487       | 76           | 0.0117    | 0.011578  | 0.988422  | 100000    | 1158      | 98958     | 7863904   | 78.64     |
| 1-4        | 1        | 4        | 0.5       | 25693      | 36           | 0.0014    | 0.005584  | 0.994416  | 98842     | 552       | 394265    | 7764946   | 78.56     |
| 5-9        | 5        | 5        | 0.5       | 35935      | 14           | 0.0004    | 0.001998  | 0.998002  | 98290     | 196       | 490960    | 7370681   | 74.99     |
| 10-14      | 10       | 5        | 0.5       | 38617      | 8            | 0.0002    | 0.001     | 0.999     | 98094     | 98        | 490224    | 6879721   | 70.13     |
| 15-19      | 15       | 5        | 0.5       | 46125      | 42           | 0.0009    | 0.00449   | 0.99551   | 97996     | 440       | 488879    | 6389497   | 65.20     |
| 20-24      | 20       | 5        | 0.5       | 57389      | 34           | 0.0006    | 0.002996  | 0.997004  | 97556     | 292       | 487048    | 5900618   | 60.48     |
| 25-29      | 25       | 5        | 0.5       | 60070      | 30           | 0.0005    | 0.002497  | 0.997503  | 97264     | 243       | 485711    | 5413569   | 55.66     |
| 30-34      | 30       | 5        | 0.5       | 50416      | 45           | 0.0009    | 0.00449   | 0.99551   | 97021     | 436       | 484015    | 4927859   | 50.79     |
| 35-39      | 35       | 5        | 0.5       | 40762      | 37           | 0.0009    | 0.00449   | 0.99551   | 96585     | 434       | 481841    | 4443844   | 46.01     |
| 40-44      | 40       | 5        | 0.5       | 36471      | 66           | 0.0018    | 0.00896   | 0.99104   | 96151     | 861       | 478604    | 3962003   | 41.21     |
| 45-49      | 45       | 5        | 0.5       | 32717      | 69           | 0.0021    | 0.010445  | 0.989555  | 95290     | 995       | 473962    | 3483399   | 36.56     |
| 50-54      | 50       | 5        | 0.5       | 28426      | 125          | 0.0044    | 0.021761  | 0.978239  | 94295     | 2052      | 466343    | 3009438   | 31.92     |
| 55-59      | 55       | 5        | 0.5       | 21454      | 142          | 0.0066    | 0.032464  | 0.967536  | 92243     | 2995      | 453727    | 2543094   | 27.57     |
| 60-64      | 60       | 5        | 0.5       | 17699      | 204          | 0.0115    | 0.055893  | 0.944107  | 89248     | 4988      | 433770    | 2089367   | 23.41     |
| 65-69      | 65       | 5        | 0.5       | 13409      | 298          | 0.0222    | 0.105163  | 0.894837  | 84260     | 8861      | 399146    | 1655597   | 19.65     |
| 70-74      | 70       | 5        | 0.5       | 11263      | 311          | 0.0276    | 0.129093  | 0.870907  | 75399     | 9733      | 352660    | 1256451   | 16.66     |
| 75-79      | 75       | 5        | 0.5       | 6972       | 294          | 0.0421    | 0.190455  | 0.809545  | 65665     | 12506     | 297061    | 903790.9  | 13.76     |
| 80-85      | 80       | 5        | 0.5       | 3754       | 218          | 0.0581    | 0.253656  | 0.746344  | 53159     | 13484     | 232085    | 606730    | 11.41     |
| 85+        | 85       | 0        | 0.5       | 3218       | 341          | 0.1059    | 1         | 0         | 39675     | 39675     | 374645    | 374645.1  | 9.44      |
| All ages   |          |          |           | 536879     | 2388         |           |           |           |           |           |           |           |           |

**DADRA & NAGAR HAVELI**

Estimated abridged life table for 2019

**MALES**

| <i>Age</i> | <i>x</i> | <i>n</i> | <i>ax</i> | <i>pop</i> | <i>death</i> | <i>Mx</i> | <i>qx</i> | <i>px</i> | <i>lx</i> | <i>dx</i> | <i>Lx</i> | <i>Tx</i> | <i>ex</i> |
|------------|----------|----------|-----------|------------|--------------|-----------|-----------|-----------|-----------|-----------|-----------|-----------|-----------|
| <1         | 0        | 1        | 0.1       | 5199       | 158          | 0.030424  | 0.029613  | 0.970387  | 100000    | 2961      | 97335     | 6555604   | 65.56     |
| 1-4        | 1        | 4        | 0.5       | 20596      | 39           | 0.001912  | 0.007618  | 0.992382  | 97039     | 739       | 386676    | 6458269   | 66.55     |
| 5-9        | 5        | 5        | 0.5       | 28475      | 23           | 0.00079   | 0.003944  | 0.996056  | 96299     | 380       | 480548    | 6071593   | 63.05     |
| 10-14      | 10       | 5        | 0.5       | 31825      | 21           | 0.000675  | 0.003369  | 0.996631  | 95920     | 323       | 478790    | 5591045   | 58.29     |
| 15-19      | 15       | 5        | 0.5       | 33165      | 53           | 0.001593  | 0.007933  | 0.992067  | 95597     | 758       | 476087    | 5112255   | 53.48     |
| 20-24      | 20       | 5        | 0.5       | 34505      | 79           | 0.002284  | 0.011354  | 0.988646  | 94838     | 1077      | 471499    | 4636168   | 48.89     |
| 25-29      | 25       | 5        | 0.5       | 33835      | 81           | 0.0024    | 0.011929  | 0.988071  | 93761     | 1118      | 466011    | 4164670   | 44.42     |
| 30-34      | 30       | 5        | 0.5       | 31490      | 90           | 0.002852  | 0.014158  | 0.985842  | 92643     | 1312      | 459935    | 3698659   | 39.92     |
| 35-39      | 35       | 5        | 0.5       | 24455      | 92           | 0.003777  | 0.018707  | 0.981293  | 91331     | 1709      | 452385    | 3238724   | 35.46     |
| 40-44      | 40       | 5        | 0.5       | 22110      | 120          | 0.005411  | 0.026693  | 0.973307  | 89623     | 2392      | 442133    | 2786338   | 31.09     |
| 45-49      | 45       | 5        | 0.5       | 18090      | 145          | 0.008016  | 0.039292  | 0.960708  | 87230     | 3427      | 427584    | 2344205   | 26.87     |
| 50-54      | 50       | 5        | 0.5       | 15075      | 182          | 0.012059  | 0.058528  | 0.941472  | 83803     | 4905      | 406753    | 1916621   | 22.87     |
| 55-59      | 55       | 5        | 0.5       | 11390      | 207          | 0.018184  | 0.086965  | 0.913035  | 78898     | 6861      | 377338    | 1509868   | 19.14     |
| 60-64      | 60       | 5        | 0.5       | 9380       | 254          | 0.027052  | 0.12669   | 0.87331   | 72037     | 9126      | 337368    | 1132531   | 15.72     |
| 65-69      | 65       | 5        | 0.5       | 6365       | 258          | 0.040577  | 0.1842    | 0.8158    | 62910     | 11588     | 285582    | 795162.4  | 12.64     |
| 70-74      | 70       | 5        | 0.5       | 4355       | 270          | 0.062026  | 0.268495  | 0.731505  | 51322     | 13780     | 222162    | 509580.1  | 9.93      |
| 75-79      | 75       | 5        | 0.5       | 2680       | 253          | 0.094456  | 0.382061  | 0.617939  | 37543     | 14344     | 151854    | 287417.7  | 7.66      |
| 80-85      | 80       | 5        | 0.5       | 1340       | 194          | 0.144967  | 0.532022  | 0.467978  | 23199     | 12342     | 85139     | 135563.7  | 5.84      |
| 85+        | 85       | 0        | 0.5       | 670        | 144          | 0.215305  | 1         | 0         | 10857     | 10857     | 50425     | 50424.56  | 4.64      |
| All ages   |          |          |           | 335000     | 2664         |           |           |           |           |           |           |           |           |

**DADRA & NAGAR HAVELI**

Estimated abridged life table for 2019

**FEMALES**

| <i>Age</i> | <i>x</i> | <i>n</i> | <i>ax</i> | <i>pop</i> | <i>death</i> | <i>Mx</i> | <i>qx</i> | <i>px</i> | <i>lx</i> | <i>dx</i> | <i>Lx</i> | <i>Tx</i> | <i>ex</i> |
|------------|----------|----------|-----------|------------|--------------|-----------|-----------|-----------|-----------|-----------|-----------|-----------|-----------|
| <1         | 0        | 1        | 0.1       | 3324       | 98           | 0.029455  | 0.028694  | 0.971306  | 100000    | 2869      | 97418     | 7043669   | 70.44     |
| 1-4        | 1        | 4        | 0.5       | 13164      | 28           | 0.002149  | 0.008559  | 0.991441  | 97131     | 831       | 386860    | 6946251   | 71.51     |
| 5-9        | 5        | 5        | 0.5       | 18320      | 13           | 0.000726  | 0.003625  | 0.996375  | 96299     | 349       | 480624    | 6559391   | 68.11     |
| 10-14      | 10       | 5        | 0.5       | 20610      | 12           | 0.000563  | 0.002812  | 0.997188  | 95950     | 270       | 479077    | 6078768   | 63.35     |
| 15-19      | 15       | 5        | 0.5       | 21755      | 21           | 0.000949  | 0.004735  | 0.995265  | 95680     | 453       | 477270    | 5599691   | 58.52     |
| 20-24      | 20       | 5        | 0.5       | 24045      | 29           | 0.001194  | 0.005954  | 0.994046  | 95227     | 567       | 474720    | 5122421   | 53.79     |
| 25-29      | 25       | 5        | 0.5       | 23129      | 32           | 0.001378  | 0.006867  | 0.993133  | 94661     | 650       | 471678    | 4647701   | 49.10     |
| 30-34      | 30       | 5        | 0.5       | 19923      | 35           | 0.001745  | 0.008688  | 0.991312  | 94011     | 817       | 468011    | 4176024   | 44.42     |
| 35-39      | 35       | 5        | 0.5       | 16717      | 40           | 0.002401  | 0.011935  | 0.988065  | 93194     | 1112      | 463188    | 3708013   | 39.79     |
| 40-44      | 40       | 5        | 0.5       | 15114      | 52           | 0.003416  | 0.016938  | 0.983062  | 92081     | 1560      | 456508    | 3244825   | 35.24     |
| 45-49      | 45       | 5        | 0.5       | 12824      | 64           | 0.004955  | 0.024472  | 0.975528  | 90522     | 2215      | 447071    | 2788317   | 30.80     |
| 50-54      | 50       | 5        | 0.5       | 10305      | 75           | 0.007274  | 0.035722  | 0.964278  | 88307     | 3155      | 433646    | 2341247   | 26.51     |
| 55-59      | 55       | 5        | 0.5       | 8702       | 94           | 0.010784  | 0.052506  | 0.947494  | 85152     | 4471      | 414582    | 1907600   | 22.40     |
| 60-64      | 60       | 5        | 0.5       | 7557       | 124          | 0.016354  | 0.07856   | 0.92144   | 80681     | 6338      | 387559    | 1493018   | 18.51     |
| 65-69      | 65       | 5        | 0.5       | 5496       | 144          | 0.026223  | 0.123048  | 0.876952  | 74343     | 9148      | 348844    | 1105459   | 14.87     |
| 70-74      | 70       | 5        | 0.5       | 3664       | 161          | 0.043856  | 0.197615  | 0.802385  | 65195     | 12884     | 293766    | 756614.4  | 11.61     |
| 75-79      | 75       | 5        | 0.5       | 2290       | 167          | 0.073015  | 0.308721  | 0.691279  | 52312     | 16150     | 221183    | 462848.1  | 8.85      |
| 80-85      | 80       | 5        | 0.5       | 1145       | 138          | 0.120313  | 0.462465  | 0.537535  | 36162     | 16724     | 139000    | 241664.8  | 6.68      |
| 85+        | 85       | 0        | 0.5       | 916        | 173          | 0.189337  | 1         | 0         | 19438     | 19438     | 102665    | 102664.6  | 5.28      |
| All ages   |          |          |           | 229000     | 1498         |           |           |           |           |           |           |           |           |

**DAMAN & DIU**

Estimated abridged life table for 2019

**MALES**

| <i>Age</i> | <i>x</i> | <i>n</i> | <i>ax</i> | <i>pop</i> | <i>death</i> | <i>Mx</i> | <i>qx</i> | <i>px</i> | <i>lx</i> | <i>dx</i> | <i>Lx</i> | <i>Tx</i> | <i>ex</i> |
|------------|----------|----------|-----------|------------|--------------|-----------|-----------|-----------|-----------|-----------|-----------|-----------|-----------|
| <1         | 0        | 1        | 0.1       | 4625       | 142          | 0.030712  | 0.029886  | 0.970114  | 100000    | 2989      | 97310     | 6669689   | 66.70     |
| 1-4        | 1        | 4        | 0.5       | 18321      | 34           | 0.001841  | 0.007339  | 0.992661  | 97011     | 712       | 386622    | 6572379   | 67.75     |
| 5-9        | 5        | 5        | 0.5       | 25330      | 19           | 0.00075   | 0.003743  | 0.996257  | 96299     | 360       | 480596    | 6185757   | 64.23     |
| 10-14      | 10       | 5        | 0.5       | 28310      | 18           | 0.000635  | 0.003172  | 0.996828  | 95939     | 304       | 478934    | 5705161   | 59.47     |
| 15-19      | 15       | 5        | 0.5       | 29502      | 43           | 0.001468  | 0.007313  | 0.992687  | 95635     | 699       | 476425    | 5226227   | 54.65     |
| 20-24      | 20       | 5        | 0.5       | 30694      | 62           | 0.002036  | 0.010129  | 0.989871  | 94935     | 962       | 472273    | 4749802   | 50.03     |
| 25-29      | 25       | 5        | 0.5       | 30098      | 63           | 0.002082  | 0.010356  | 0.989644  | 93974     | 973       | 467436    | 4277529   | 45.52     |
| 30-34      | 30       | 5        | 0.5       | 28012      | 68           | 0.002421  | 0.012032  | 0.987968  | 93001     | 1119      | 462205    | 3810093   | 40.97     |
| 35-39      | 35       | 5        | 0.5       | 21754      | 69           | 0.003173  | 0.01574   | 0.98426   | 91882     | 1446      | 455792    | 3347888   | 36.44     |
| 40-44      | 40       | 5        | 0.5       | 19668      | 90           | 0.004566  | 0.022572  | 0.977428  | 90435     | 2041      | 447073    | 2892096   | 31.98     |
| 45-49      | 45       | 5        | 0.5       | 16092      | 111          | 0.006887  | 0.033851  | 0.966149  | 88394     | 2992      | 434490    | 2445022   | 27.66     |
| 50-54      | 50       | 5        | 0.5       | 13410      | 142          | 0.010599  | 0.051629  | 0.948371  | 85402     | 4409      | 415986    | 2010533   | 23.54     |
| 55-59      | 55       | 5        | 0.5       | 10132      | 166          | 0.01638   | 0.078678  | 0.921322  | 80993     | 6372      | 389032    | 1594547   | 19.69     |
| 60-64      | 60       | 5        | 0.5       | 8344       | 207          | 0.024805  | 0.116785  | 0.883215  | 74620     | 8715      | 351315    | 1205515   | 16.16     |
| 65-69      | 65       | 5        | 0.5       | 5662       | 215          | 0.037955  | 0.173328  | 0.826672  | 65906     | 11423     | 300970    | 854199.8  | 12.96     |
| 70-74      | 70       | 5        | 0.5       | 3874       | 228          | 0.058951  | 0.256894  | 0.743106  | 54482     | 13996     | 237421    | 553229.5  | 10.15     |
| 75-79      | 75       | 5        | 0.5       | 2384       | 217          | 0.09122   | 0.371403  | 0.628597  | 40486     | 15037     | 164839    | 315808.1  | 7.80      |
| 80-85      | 80       | 5        | 0.5       | 1192       | 169          | 0.141807  | 0.52346   | 0.47654   | 25450     | 13322     | 93943     | 150968.8  | 5.93      |
| 85+        | 85       | 0        | 0.5       | 596        | 127          | 0.212671  | 1         | 0         | 12128     | 12128     | 57026     | 57025.79  | 4.70      |
| All ages   |          |          |           | 298000     | 2190         |           |           |           |           |           |           |           |           |

**DAMAN & DIU**

Estimated abridged life table for 2019

**FEMALES**

| <i>Age</i> | <i>x</i> | <i>n</i> | <i>ax</i> | <i>pop</i> | <i>death</i> | <i>Mx</i> | <i>qx</i> | <i>px</i> | <i>lx</i> | <i>dx</i> | <i>Lx</i> | <i>Tx</i> | <i>ex</i> |
|------------|----------|----------|-----------|------------|--------------|-----------|-----------|-----------|-----------|-----------|-----------|-----------|-----------|
| <1         | 0        | 1        | 0.1       | 1916       | 59           | 0.030947  | 0.030108  | 0.969892  | 100000    | 3011      | 97290     | 7245384   | 72.45     |
| 1-4        | 1        | 4        | 0.5       | 7588       | 14           | 0.001784  | 0.007111  | 0.992889  | 96989     | 690       | 386577    | 7148094   | 73.70     |
| 5-9        | 5        | 5        | 0.5       | 10560      | 6            | 0.00058   | 0.002897  | 0.997103  | 96300     | 279       | 480800    | 6761517   | 70.21     |
| 10-14      | 10       | 5        | 0.5       | 11880      | 5            | 0.000414  | 0.00207   | 0.99793   | 96021     | 199       | 479606    | 6280717   | 65.41     |
| 15-19      | 15       | 5        | 0.5       | 12540      | 8            | 0.000628  | 0.003134  | 0.996866  | 95822     | 300       | 478358    | 5801111   | 60.54     |
| 20-24      | 20       | 5        | 0.5       | 13860      | 11           | 0.000793  | 0.003955  | 0.996045  | 95521     | 378       | 476663    | 5322753   | 55.72     |
| 25-29      | 25       | 5        | 0.5       | 13332      | 13           | 0.000951  | 0.004744  | 0.995256  | 95144     | 451       | 474590    | 4846090   | 50.93     |
| 30-34      | 30       | 5        | 0.5       | 11484      | 14           | 0.001223  | 0.006098  | 0.993902  | 94692     | 577       | 472018    | 4371500   | 46.17     |
| 35-39      | 35       | 5        | 0.5       | 9636       | 16           | 0.001689  | 0.008408  | 0.991592  | 94115     | 791       | 468596    | 3899482   | 41.43     |
| 40-44      | 40       | 5        | 0.5       | 8712       | 21           | 0.002431  | 0.012081  | 0.987919  | 93324     | 1127      | 463799    | 3430886   | 36.76     |
| 45-49      | 45       | 5        | 0.5       | 7392       | 27           | 0.003644  | 0.018054  | 0.981946  | 92196     | 1665      | 456819    | 2967087   | 32.18     |
| 50-54      | 50       | 5        | 0.5       | 5940       | 33           | 0.005514  | 0.027194  | 0.972806  | 90532     | 2462      | 446503    | 2510268   | 27.73     |
| 55-59      | 55       | 5        | 0.5       | 5016       | 43           | 0.008479  | 0.041517  | 0.958483  | 88070     | 3656      | 431207    | 2063765   | 23.43     |
| 60-64      | 60       | 5        | 0.5       | 4356       | 58           | 0.013326  | 0.064483  | 0.935517  | 84413     | 5443      | 408458    | 1632558   | 19.34     |
| 65-69      | 65       | 5        | 0.5       | 3168       | 71           | 0.022413  | 0.106117  | 0.893883  | 78970     | 8380      | 373900    | 1224099   | 15.50     |
| 70-74      | 70       | 5        | 0.5       | 2112       | 83           | 0.039163  | 0.178355  | 0.821645  | 70590     | 12590     | 321475    | 850199.1  | 12.04     |
| 75-79      | 75       | 5        | 0.5       | 1320       | 90           | 0.068212  | 0.291373  | 0.708627  | 58000     | 16900     | 247751    | 528724.4  | 9.12      |
| 80-85      | 80       | 5        | 0.5       | 660        | 76           | 0.115784  | 0.448963  | 0.551037  | 41100     | 18453     | 159370    | 280973.9  | 6.84      |
| 85+        | 85       | 0        | 0.5       | 528        | 98           | 0.186243  | 1         | 0         | 22648     | 22648     | 121604    | 121603.6  | 5.37      |
| All ages   |          |          |           | 132000     | 746          |           |           |           |           |           |           |           |           |



**DELHI**

Estimated abridged life table for 2019

**MALES**

| <i>Age</i> | <i>x</i> | <i>n</i> | <i>ax</i> | <i>pop</i> | <i>death</i> | <i>Mx</i> | <i>qx</i> | <i>px</i> | <i>lx</i> | <i>dx</i> | <i>Lx</i> | <i>Tx</i> | <i>ex</i> |
|------------|----------|----------|-----------|------------|--------------|-----------|-----------|-----------|-----------|-----------|-----------|-----------|-----------|
| <1         | 0        | 1        | 0.1       | 155000     | 2217         | 0.0143    | 0.014118  | 0.985882  | 100000    | 1412      | 98729     | 7362102   | 73.62     |
| 1-4        | 1        | 4        | 0.5       | 616000     | 924          | 0.0015    | 0.005982  | 0.994018  | 98588     | 590       | 393173    | 7263372   | 73.67     |
| 5-9        | 5        | 5        | 0.5       | 823000     | 329          | 0.0004    | 0.001998  | 0.998002  | 97998     | 196       | 489503    | 6870199   | 70.11     |
| 10-14      | 10       | 5        | 0.5       | 830000     | 415          | 0.0005    | 0.002497  | 0.997503  | 97803     | 244       | 488403    | 6380697   | 65.24     |
| 15-19      | 15       | 5        | 0.5       | 929000     | 650          | 0.0007    | 0.003494  | 0.996506  | 97558     | 341       | 486940    | 5892294   | 60.40     |
| 20-24      | 20       | 5        | 0.5       | 1041000    | 521          | 0.0005    | 0.002497  | 0.997503  | 97218     | 243       | 485481    | 5405354   | 55.60     |
| 25-29      | 25       | 5        | 0.5       | 1071000    | 1071         | 0.001     | 0.004988  | 0.995012  | 96975     | 484       | 483665    | 4919873   | 50.73     |
| 30-34      | 30       | 5        | 0.5       | 1026000    | 923          | 0.0009    | 0.00449   | 0.99551   | 96491     | 433       | 481373    | 4436208   | 45.98     |
| 35-39      | 35       | 5        | 0.5       | 931000     | 1862         | 0.002     | 0.00995   | 0.99005   | 96058     | 956       | 477900    | 3954836   | 41.17     |
| 40-44      | 40       | 5        | 0.5       | 806000     | 1854         | 0.0023    | 0.011434  | 0.988566  | 95102     | 1087      | 472792    | 3476936   | 36.56     |
| 45-49      | 45       | 5        | 0.5       | 697000     | 2370         | 0.0034    | 0.016857  | 0.983143  | 94015     | 1585      | 466111    | 3004144   | 31.95     |
| 50-54      | 50       | 5        | 0.5       | 586000     | 3750         | 0.0064    | 0.031496  | 0.968504  | 92430     | 2911      | 454872    | 2538032   | 27.46     |
| 55-59      | 55       | 5        | 0.5       | 468000     | 3744         | 0.008     | 0.039216  | 0.960784  | 89519     | 3511      | 438817    | 2083161   | 23.27     |
| 60-64      | 60       | 5        | 0.5       | 349000     | 5410         | 0.0155    | 0.074609  | 0.925391  | 86008     | 6417      | 413999    | 1644343   | 19.12     |
| 65-69      | 65       | 5        | 0.5       | 249000     | 5478         | 0.022     | 0.104265  | 0.895735  | 79591     | 8299      | 377210    | 1230345   | 15.46     |
| 70-74      | 70       | 5        | 0.5       | 177000     | 6407         | 0.0362    | 0.165979  | 0.834021  | 71293     | 11833     | 326880    | 853135.2  | 11.97     |
| 75-79      | 75       | 5        | 0.5       | 111000     | 6671         | 0.0601    | 0.261248  | 0.738752  | 59460     | 15534     | 258464    | 526254.8  | 8.85      |
| 80-85      | 80       | 5        | 0.5       | 32889      | 2131         | 0.0648    | 0.27883   | 0.72117   | 43926     | 12248     | 189010    | 267791.3  | 6.10      |
| 85+        | 85       | 0        | 0.5       | 10963      | 4408         | 0.4021    | 1         | 0         | 31678     | 31678     | 78782     | 78781.5   | 2.49      |
| All ages   |          |          |           | 10908852   | 51135        |           |           |           |           |           |           |           |           |

**DELHI**

Estimated abridged life table for 2019

**FEMALES**

| <i>Age</i> | <i>x</i> | <i>n</i> | <i>ax</i> | <i>pop</i> | <i>death</i> | <i>Mx</i> | <i>qx</i> | <i>px</i> | <i>lx</i> | <i>dx</i> | <i>Lx</i> | <i>Tx</i> | <i>ex</i> |
|------------|----------|----------|-----------|------------|--------------|-----------|-----------|-----------|-----------|-----------|-----------|-----------|-----------|
| <1         | 0        | 1        | 0.1       | 133000     | 1556         | 0.0117    | 0.011578  | 0.988422  | 100000    | 1158      | 98958     | 7863904   | 78.64     |
| 1-4        | 1        | 4        | 0.5       | 528000     | 739          | 0.0014    | 0.005584  | 0.994416  | 98842     | 552       | 394265    | 7764946   | 78.56     |
| 5-9        | 5        | 5        | 0.5       | 683000     | 273          | 0.0004    | 0.001998  | 0.998002  | 98290     | 196       | 490960    | 7370681   | 74.99     |
| 10-14      | 10       | 5        | 0.5       | 711000     | 142          | 0.0002    | 0.001     | 0.999     | 98094     | 98        | 490224    | 6879721   | 70.13     |
| 15-19      | 15       | 5        | 0.5       | 811000     | 730          | 0.0009    | 0.00449   | 0.99551   | 97996     | 440       | 488879    | 6389497   | 65.20     |
| 20-24      | 20       | 5        | 0.5       | 982000     | 589          | 0.0006    | 0.002996  | 0.997004  | 97556     | 292       | 487048    | 5900618   | 60.48     |
| 25-29      | 25       | 5        | 0.5       | 958000     | 479          | 0.0005    | 0.002497  | 0.997503  | 97264     | 243       | 485711    | 5413569   | 55.66     |
| 30-34      | 30       | 5        | 0.5       | 853000     | 768          | 0.0009    | 0.00449   | 0.99551   | 97021     | 436       | 484015    | 4927859   | 50.79     |
| 35-39      | 35       | 5        | 0.5       | 797000     | 717          | 0.0009    | 0.00449   | 0.99551   | 96585     | 434       | 481841    | 4443844   | 46.01     |
| 40-44      | 40       | 5        | 0.5       | 705000     | 1269         | 0.0018    | 0.00896   | 0.99104   | 96151     | 861       | 478604    | 3962003   | 41.21     |
| 45-49      | 45       | 5        | 0.5       | 613000     | 1287         | 0.0021    | 0.010445  | 0.989555  | 95290     | 995       | 473962    | 3483399   | 36.56     |
| 50-54      | 50       | 5        | 0.5       | 512000     | 2253         | 0.0044    | 0.021761  | 0.978239  | 94295     | 2052      | 466343    | 3009438   | 31.92     |
| 55-59      | 55       | 5        | 0.5       | 403000     | 2660         | 0.0066    | 0.032464  | 0.967536  | 92243     | 2995      | 453727    | 2543094   | 27.57     |
| 60-64      | 60       | 5        | 0.5       | 304000     | 3496         | 0.0115    | 0.055893  | 0.944107  | 89248     | 4988      | 433770    | 2089367   | 23.41     |
| 65-69      | 65       | 5        | 0.5       | 235000     | 5217         | 0.0222    | 0.105163  | 0.894837  | 84260     | 8861      | 399146    | 1655597   | 19.65     |
| 70-74      | 70       | 5        | 0.5       | 179000     | 4940         | 0.0276    | 0.129093  | 0.870907  | 75399     | 9733      | 352660    | 1256451   | 16.66     |
| 75-79      | 75       | 5        | 0.5       | 111000     | 4673         | 0.0421    | 0.190455  | 0.809545  | 65665     | 12506     | 297061    | 903790.9  | 13.76     |
| 80-85      | 80       | 5        | 0.5       | 38436      | 2233         | 0.0581    | 0.253656  | 0.746344  | 53159     | 13484     | 232085    | 606730    | 11.41     |
| 85+        | 85       | 0        | 0.5       | 28827      | 3053         | 0.1059    | 1         | 0         | 39675     | 39675     | 374645    | 374645.1  | 9.44      |
| All ages   |          |          |           | 9585263    | 37075        |           |           |           |           |           |           |           |           |

**LAKSHADWEEP**

Estimated abridged life table for 2019

**MALES**

| <i>Age</i> | <i>x</i> | <i>n</i> | <i>ax</i> | <i>pop</i> | <i>death</i> | <i>Mx</i> | <i>qx</i> | <i>px</i> | <i>lx</i> | <i>dx</i> | <i>Lx</i> | <i>Tx</i> | <i>ex</i> |
|------------|----------|----------|-----------|------------|--------------|-----------|-----------|-----------|-----------|-----------|-----------|-----------|-----------|
| <1         | 0        | 1        | 0.1       | 471        | 4            | 0.007781  | 0.007727  | 0.992273  | 100000    | 773       | 99305     | 7842417   | 78.42     |
| 1-4        | 1        | 4        | 0.5       | 1877       | 2            | 0.001243  | 0.00496   | 0.99504   | 99227     | 492       | 395925    | 7743112   | 78.03     |
| 5-9        | 5        | 5        | 0.5       | 2454       | 0            | 0.000122  | 0.000611  | 0.999389  | 98735     | 60        | 493525    | 7347188   | 74.41     |
| 10-14      | 10       | 5        | 0.5       | 2551       | 0            | 0.000144  | 0.000718  | 0.999282  | 98675     | 71        | 493197    | 6853663   | 69.46     |
| 15-19      | 15       | 5        | 0.5       | 2617       | 1            | 0.000287  | 0.001432  | 0.998568  | 98604     | 141       | 492666    | 6360466   | 64.51     |
| 20-24      | 20       | 5        | 0.5       | 2710       | 1            | 0.000338  | 0.00169   | 0.99831   | 98463     | 166       | 491897    | 5867800   | 59.59     |
| 25-29      | 25       | 5        | 0.5       | 2642       | 1            | 0.000511  | 0.002551  | 0.997449  | 98296     | 251       | 490855    | 5375902   | 54.69     |
| 30-34      | 30       | 5        | 0.5       | 2507       | 2            | 0.000658  | 0.003285  | 0.996715  | 98046     | 322       | 489422    | 4885048   | 49.82     |
| 35-39      | 35       | 5        | 0.5       | 2358       | 3            | 0.001399  | 0.006973  | 0.993027  | 97723     | 681       | 486914    | 4395625   | 44.98     |
| 40-44      | 40       | 5        | 0.5       | 2241       | 4            | 0.0018    | 0.008959  | 0.991041  | 97042     | 869       | 483037    | 3908712   | 40.28     |
| 45-49      | 45       | 5        | 0.5       | 2191       | 7            | 0.003354  | 0.016633  | 0.983367  | 96173     | 1600      | 476864    | 3425675   | 35.62     |
| 50-54      | 50       | 5        | 0.5       | 2122       | 9            | 0.004234  | 0.02095   | 0.97905   | 94573     | 1981      | 467912    | 2948811   | 31.18     |
| 55-59      | 55       | 5        | 0.5       | 1955       | 12           | 0.006063  | 0.029862  | 0.970138  | 92592     | 2765      | 456046    | 2480899   | 26.79     |
| 60-64      | 60       | 5        | 0.5       | 1688       | 14           | 0.00858   | 0.041998  | 0.958002  | 89827     | 3773      | 439702    | 2024853   | 22.54     |
| 65-69      | 65       | 5        | 0.5       | 1384       | 28           | 0.020233  | 0.096295  | 0.903705  | 86054     | 8287      | 409555    | 1585151   | 18.42     |
| 70-74      | 70       | 5        | 0.5       | 1004       | 30           | 0.029685  | 0.138171  | 0.861829  | 77768     | 10745     | 361975    | 1175596   | 15.12     |
| 75-79      | 75       | 5        | 0.5       | 606        | 23           | 0.037586  | 0.171787  | 0.828213  | 67022     | 11514     | 306328    | 813621.3  | 12.14     |
| 80-85      | 80       | 5        | 0.5       | 237        | 14           | 0.059132  | 0.257583  | 0.742417  | 55509     | 14298     | 241799    | 507293.3  | 9.14      |
| 85+        | 85       | 0        | 0.5       | 136        | 21           | 0.155222  | 1         | 0         | 41211     | 41211     | 265494    | 265494.5  | 6.44      |
| All ages   |          |          |           | 33751      | 177          |           |           |           |           |           |           |           |           |

**LAKSHADWEEP**

Estimated abridged life table for 2019

**FEMALES**

| <i>Age</i> | <i>x</i> | <i>n</i> | <i>ax</i> | <i>pop</i> | <i>death</i> | <i>Mx</i> | <i>qx</i> | <i>px</i> | <i>lx</i> | <i>dx</i> | <i>Lx</i> | <i>Tx</i> | <i>ex</i> |
|------------|----------|----------|-----------|------------|--------------|-----------|-----------|-----------|-----------|-----------|-----------|-----------|-----------|
| <1         | 0        | 1        | 0.1       | 395        | 4            | 0.010959  | 0.010852  | 0.989148  | 100000    | 1085      | 99023     | 8256614   | 82.57     |
| 1-4        | 1        | 4        | 0.5       | 1580       | 1            | 0.000422  | 0.001686  | 0.998314  | 98915     | 167       | 395326    | 8157591   | 82.47     |
| 5-9        | 5        | 5        | 0.5       | 2059       | 0            | 0.000219  | 0.001092  | 0.998908  | 98748     | 108       | 493471    | 7762265   | 78.61     |
| 10-14      | 10       | 5        | 0.5       | 2148       | 1            | 0.000256  | 0.00128   | 0.99872   | 98640     | 126       | 492885    | 7268794   | 73.69     |
| 15-19      | 15       | 5        | 0.5       | 2186       | 0            | 6.86E-05  | 0.000343  | 0.999657  | 98514     | 34        | 492485    | 6775909   | 68.78     |
| 20-24      | 20       | 5        | 0.5       | 2237       | 0            | 8.2E-05   | 0.00041   | 0.99959   | 98480     | 40        | 492300    | 6283423   | 63.80     |
| 25-29      | 25       | 5        | 0.5       | 2251       | 1            | 0.0004    | 0.001997  | 0.998003  | 98440     | 197       | 491708    | 5791123   | 58.83     |
| 30-34      | 30       | 5        | 0.5       | 2329       | 1            | 0.000472  | 0.002359  | 0.997641  | 98243     | 232       | 490637    | 5299416   | 53.94     |
| 35-39      | 35       | 5        | 0.5       | 2366       | 1            | 0.000254  | 0.001267  | 0.998733  | 98011     | 124       | 489747    | 4808779   | 49.06     |
| 40-44      | 40       | 5        | 0.5       | 2355       | 1            | 0.000311  | 0.001556  | 0.998444  | 97887     | 152       | 489056    | 4319032   | 44.12     |
| 45-49      | 45       | 5        | 0.5       | 2339       | 5            | 0.001924  | 0.009571  | 0.990429  | 97735     | 935       | 486336    | 3829976   | 39.19     |
| 50-54      | 50       | 5        | 0.5       | 2233       | 6            | 0.002463  | 0.012239  | 0.987761  | 96800     | 1185      | 481036    | 3343640   | 34.54     |
| 55-59      | 55       | 5        | 0.5       | 2009       | 11           | 0.005452  | 0.026893  | 0.973107  | 95615     | 2571      | 471646    | 2862604   | 29.94     |
| 60-64      | 60       | 5        | 0.5       | 1697       | 13           | 0.007888  | 0.038677  | 0.961323  | 93043     | 3599      | 456221    | 2390959   | 25.70     |
| 65-69      | 65       | 5        | 0.5       | 1385       | 24           | 0.017571  | 0.084157  | 0.915843  | 89445     | 7527      | 428406    | 1934738   | 21.63     |
| 70-74      | 70       | 5        | 0.5       | 1075       | 30           | 0.027943  | 0.130593  | 0.869407  | 81917     | 10698     | 382843    | 1506332   | 18.39     |
| 75-79      | 75       | 5        | 0.5       | 739        | 23           | 0.031095  | 0.14426   | 0.85574   | 71220     | 10274     | 330413    | 1123489   | 15.77     |
| 80-85      | 80       | 5        | 0.5       | 321        | 14           | 0.043982  | 0.198125  | 0.801875  | 60945     | 12075     | 274540    | 793076.6  | 13.01     |
| 85+        | 85       | 0        | 0.5       | 225        | 21           | 0.094247  | 1         | 0         | 48871     | 48871     | 518536    | 518536.4  | 10.61     |
| All ages   |          |          |           | 31928      | 157          |           |           |           |           |           |           |           |           |

**PUDUCHERRY**

Estimated abridged life table for 2019

**MALES**

| <i>Age</i> | <i>x</i> | <i>n</i> | <i>ax</i> | <i>pop</i> | <i>death</i> | <i>Mx</i> | <i>qx</i> | <i>px</i> | <i>lx</i> | <i>dx</i> | <i>Lx</i> | <i>Tx</i> | <i>ex</i> |
|------------|----------|----------|-----------|------------|--------------|-----------|-----------|-----------|-----------|-----------|-----------|-----------|-----------|
| <1         | 0        | 1        | 0.1       | 9442       | 286          | 0.030328  | 0.029523  | 0.970477  | 100000    | 2952      | 97343     | 6379956   | 63.80     |
| 1-4        | 1        | 4        | 0.5       | 37406      | 89           | 0.002382  | 0.009484  | 0.990516  | 97048     | 920       | 386350    | 6282613   | 64.74     |
| 5-9        | 5        | 5        | 0.5       | 49776      | 27           | 0.000534  | 0.002667  | 0.997333  | 96127     | 256       | 479996    | 5896263   | 61.34     |
| 10-14      | 10       | 5        | 0.5       | 55632      | 32           | 0.000584  | 0.002916  | 0.997084  | 95871     | 280       | 478656    | 5416267   | 56.50     |
| 15-19      | 15       | 5        | 0.5       | 61488      | 105          | 0.0017    | 0.008464  | 0.991536  | 95591     | 809       | 475935    | 4937611   | 51.65     |
| 20-24      | 20       | 5        | 0.5       | 65148      | 128          | 0.001961  | 0.009757  | 0.990243  | 94782     | 925       | 471600    | 4461676   | 47.07     |
| 25-29      | 25       | 5        | 0.5       | 68808      | 196          | 0.002848  | 0.014141  | 0.985859  | 93858     | 1327      | 465970    | 3990077   | 42.51     |
| 30-34      | 30       | 5        | 0.5       | 67344      | 240          | 0.003557  | 0.017629  | 0.982371  | 92530     | 1631      | 458573    | 3524107   | 38.09     |
| 35-39      | 35       | 5        | 0.5       | 58560      | 396          | 0.006771  | 0.03329   | 0.96671   | 90899     | 3026      | 446930    | 3065534   | 33.72     |
| 40-44      | 40       | 5        | 0.5       | 54168      | 485          | 0.008946  | 0.043753  | 0.956247  | 87873     | 3845      | 429754    | 2618603   | 29.80     |
| 45-49      | 45       | 5        | 0.5       | 49044      | 671          | 0.013688  | 0.066177  | 0.933823  | 84028     | 5561      | 406240    | 2188850   | 26.05     |
| 50-54      | 50       | 5        | 0.5       | 41724      | 821          | 0.019665  | 0.093719  | 0.906281  | 78468     | 7354      | 373953    | 1782610   | 22.72     |
| 55-59      | 55       | 5        | 0.5       | 33672      | 711          | 0.021102  | 0.100221  | 0.899779  | 71114     | 7127      | 337751    | 1408656   | 19.81     |
| 60-64      | 60       | 5        | 0.5       | 30012      | 868          | 0.028936  | 0.13492   | 0.86508   | 63987     | 8633      | 298350    | 1070905   | 16.74     |
| 65-69      | 65       | 5        | 0.5       | 21228      | 718          | 0.033818  | 0.155909  | 0.844091  | 55354     | 8630      | 255193    | 772554.9  | 13.96     |
| 70-74      | 70       | 5        | 0.5       | 13908      | 779          | 0.056003  | 0.245625  | 0.754375  | 46723     | 11476     | 204926    | 517362.4  | 11.07     |
| 75-79      | 75       | 5        | 0.5       | 8052       | 596          | 0.073972  | 0.312135  | 0.687865  | 35247     | 11002     | 148731    | 312436.3  | 8.86      |
| 80-85      | 80       | 5        | 0.5       | 4392       | 367          | 0.083455  | 0.345244  | 0.654756  | 24245     | 8371      | 100300    | 163705.8  | 6.75      |
| 85+        | 85       | 0        | 0.5       | 2196       | 550          | 0.250365  | 1         | 0         | 15875     | 15875     | 63406     | 63406.1   | 3.99      |
| All ages   |          |          |           | 732000     | 8063         |           |           |           |           |           |           |           |           |

**PUDUCHERRY**

Estimated abridged life table for 2019

**FEMALES**

| <i>Age</i> | <i>x</i> | <i>n</i> | <i>ax</i> | <i>pop</i> | <i>death</i> | <i>Mx</i> | <i>qx</i> | <i>px</i> | <i>lx</i> | <i>dx</i> | <i>Lx</i> | <i>Tx</i> | <i>ex</i> |
|------------|----------|----------|-----------|------------|--------------|-----------|-----------|-----------|-----------|-----------|-----------|-----------|-----------|
| <1         | 0        | 1        | 0.1       | 9727       | 172          | 0.017686  | 0.017409  | 0.982591  | 100000    | 1741      | 98433     | 7250372   | 72.50     |
| 1-4        | 1        | 4        | 0.5       | 38524      | 78           | 0.002025  | 0.008068  | 0.991932  | 98259     | 793       | 391451    | 7151939   | 72.79     |
| 5-9        | 5        | 5        | 0.5       | 52206      | 24           | 0.000466  | 0.002325  | 0.997675  | 97466     | 227       | 486765    | 6760488   | 69.36     |
| 10-14      | 10       | 5        | 0.5       | 56952      | 30           | 0.000522  | 0.002605  | 0.997395  | 97240     | 253       | 485566    | 6273723   | 64.52     |
| 15-19      | 15       | 5        | 0.5       | 61698      | 79           | 0.001277  | 0.006363  | 0.993637  | 96986     | 617       | 483390    | 5788157   | 59.68     |
| 20-24      | 20       | 5        | 0.5       | 76727      | 96           | 0.001255  | 0.006254  | 0.993746  | 96369     | 603       | 480340    | 5304767   | 55.05     |
| 25-29      | 25       | 5        | 0.5       | 79100      | 112          | 0.001417  | 0.007059  | 0.992941  | 95767     | 676       | 477143    | 4824427   | 50.38     |
| 30-34      | 30       | 5        | 0.5       | 70399      | 137          | 0.001946  | 0.009681  | 0.990319  | 95091     | 921       | 473152    | 4347284   | 45.72     |
| 35-39      | 35       | 5        | 0.5       | 64862      | 121          | 0.001867  | 0.00929   | 0.99071   | 94170     | 875       | 468663    | 3874132   | 41.14     |
| 40-44      | 40       | 5        | 0.5       | 57743      | 148          | 0.002563  | 0.012732  | 0.987268  | 93295     | 1188      | 463507    | 3405469   | 36.50     |
| 45-49      | 45       | 5        | 0.5       | 49833      | 271          | 0.005428  | 0.026777  | 0.973223  | 92107     | 2466      | 454371    | 2941962   | 31.94     |
| 50-54      | 50       | 5        | 0.5       | 46669      | 331          | 0.007084  | 0.034805  | 0.965195  | 89641     | 3120      | 440405    | 2487591   | 27.75     |
| 55-59      | 55       | 5        | 0.5       | 38759      | 352          | 0.009093  | 0.044452  | 0.955548  | 86521     | 3846      | 422990    | 2047186   | 23.66     |
| 60-64      | 60       | 5        | 0.5       | 30849      | 431          | 0.013963  | 0.067458  | 0.932542  | 82675     | 5577      | 399432    | 1624196   | 19.65     |
| 65-69      | 65       | 5        | 0.5       | 23730      | 490          | 0.020653  | 0.098195  | 0.901805  | 77098     | 7571      | 366563    | 1224764   | 15.89     |
| 70-74      | 70       | 5        | 0.5       | 15029      | 789          | 0.052495  | 0.232026  | 0.767974  | 69527     | 16132     | 307306    | 858200.9  | 12.34     |
| 75-79      | 75       | 5        | 0.5       | 10283      | 603          | 0.058671  | 0.255831  | 0.744169  | 53395     | 13660     | 232825    | 550894.8  | 10.32     |
| 80-85      | 80       | 5        | 0.5       | 4746       | 371          | 0.078228  | 0.327159  | 0.672841  | 39735     | 13000     | 166176    | 318069.5  | 8.00      |
| 85+        | 85       | 0        | 0.5       | 3164       | 557          | 0.176014  | 1         | 0         | 26735     | 26735     | 151894    | 151893.6  | 5.68      |
| All ages   |          |          |           | 791000     | 5192         |           |           |           |           |           |           |           |           |

**ANDAMAN & NICOBAR ISLANDS**

Estimated abridged life table for 2019

**MALES**

| <i>Age</i> | <i>x</i> | <i>n</i> | <i>ax</i> | <i>pop</i> | <i>death</i> | <i>Mx</i> | <i>qx</i> | <i>px</i> | <i>lx</i> | <i>dx</i> | <i>Lx</i> | <i>Tx</i> | <i>ex</i> |
|------------|----------|----------|-----------|------------|--------------|-----------|-----------|-----------|-----------|-----------|-----------|-----------|-----------|
| <1         | 0        | 1        | 0.1       | 2750       | 56           | 0.020439  | 0.02007   | 0.97993   | 100000    | 2007      | 98194     | 6746949   | 67.47     |
| 1-4        | 1        | 4        | 0.5       | 10789      | 12           | 0.001133  | 0.00452   | 0.99548   | 97993     | 443       | 391086    | 6648755   | 67.85     |
| 5-9        | 5        | 5        | 0.5       | 14386      | 8            | 0.000532  | 0.002655  | 0.997345  | 97550     | 259       | 487103    | 6257669   | 64.15     |
| 10-14      | 10       | 5        | 0.5       | 16078      | 9            | 0.000582  | 0.002903  | 0.997097  | 97291     | 282       | 485749    | 5770567   | 59.31     |
| 15-19      | 15       | 5        | 0.5       | 17770      | 23           | 0.001291  | 0.006437  | 0.993563  | 97009     | 624       | 483482    | 5284818   | 54.48     |
| 20-24      | 20       | 5        | 0.5       | 18828      | 28           | 0.00149   | 0.007421  | 0.992579  | 96384     | 715       | 480132    | 4801336   | 49.81     |
| 25-29      | 25       | 5        | 0.5       | 19886      | 52           | 0.002602  | 0.012928  | 0.987072  | 95669     | 1237      | 475252    | 4321204   | 45.17     |
| 30-34      | 30       | 5        | 0.5       | 19463      | 63           | 0.00325   | 0.016118  | 0.983882  | 94432     | 1522      | 468355    | 3845952   | 40.73     |
| 35-39      | 35       | 5        | 0.5       | 16924      | 78           | 0.004627  | 0.022868  | 0.977132  | 92910     | 2125      | 459238    | 3377597   | 36.35     |
| 40-44      | 40       | 5        | 0.5       | 15655      | 96           | 0.006113  | 0.030105  | 0.969895  | 90785     | 2733      | 447094    | 2918358   | 32.15     |
| 45-49      | 45       | 5        | 0.5       | 14174      | 114          | 0.008064  | 0.039523  | 0.960477  | 88052     | 3480      | 431561    | 2471264   | 28.07     |
| 50-54      | 50       | 5        | 0.5       | 12059      | 140          | 0.011585  | 0.056295  | 0.943705  | 84572     | 4761      | 410958    | 2039704   | 24.12     |
| 55-59      | 55       | 5        | 0.5       | 9731       | 137          | 0.014058  | 0.067901  | 0.932099  | 79811     | 5419      | 385507    | 1628746   | 20.41     |
| 60-64      | 60       | 5        | 0.5       | 8674       | 167          | 0.019277  | 0.091952  | 0.908048  | 74392     | 6841      | 354858    | 1243239   | 16.71     |
| 65-69      | 65       | 5        | 0.5       | 6135       | 192          | 0.031238  | 0.144878  | 0.855122  | 67551     | 9787      | 313290    | 888381.1  | 13.15     |
| 70-74      | 70       | 5        | 0.5       | 4020       | 251          | 0.062365  | 0.269767  | 0.730233  | 57765     | 15583     | 249866    | 575091.4  | 9.96      |
| 75-79      | 75       | 5        | 0.5       | 2327       | 218          | 0.093871  | 0.380145  | 0.619855  | 42182     | 16035     | 170820    | 325225.9  | 7.71      |
| 80-85      | 80       | 5        | 0.5       | 1269       | 182          | 0.143349  | 0.527649  | 0.472351  | 26146     | 13796     | 96242     | 154405.6  | 5.91      |
| 85+        | 85       | 0        | 0.5       | 635        | 135          | 0.212338  | 1         | 0         | 12350     | 12350     | 58163     | 58163.49  | 4.71      |
| All ages   |          |          |           | 211553     | 1961         |           |           |           |           |           |           |           |           |

**ANDAMAN & NICOBAR ISLANDS**

Estimated abridged life table for 2019

**FEMALES**

| <i>Age</i> | <i>x</i> | <i>n</i> | <i>ax</i> | <i>pop</i> | <i>death</i> | <i>Mx</i> | <i>qx</i> | <i>px</i> | <i>lx</i> | <i>dx</i> | <i>Lx</i> | <i>Tx</i> | <i>ex</i> |
|------------|----------|----------|-----------|------------|--------------|-----------|-----------|-----------|-----------|-----------|-----------|-----------|-----------|
| <1         | 0        | 1        | 0.1       | 2317       | 46           | 0.019851  | 0.019502  | 0.980498  | 100000    | 1950      | 98245     | 7268235   | 72.68     |
| 1-4        | 1        | 4        | 0.5       | 8988       | 11           | 0.001279  | 0.005103  | 0.994897  | 98050     | 500       | 391198    | 7169990   | 73.13     |
| 5-9        | 5        | 5        | 0.5       | 12231      | 7            | 0.000589  | 0.002939  | 0.997061  | 97549     | 287       | 487030    | 6778792   | 69.49     |
| 10-14      | 10       | 5        | 0.5       | 13343      | 9            | 0.00066   | 0.003292  | 0.996708  | 97263     | 320       | 485513    | 6291761   | 64.69     |
| 15-19      | 15       | 5        | 0.5       | 14455      | 13           | 0.000872  | 0.004349  | 0.995651  | 96943     | 422       | 483659    | 5806248   | 59.89     |
| 20-24      | 20       | 5        | 0.5       | 17976      | 15           | 0.000857  | 0.004274  | 0.995726  | 96521     | 413       | 481573    | 5322589   | 55.14     |
| 25-29      | 25       | 5        | 0.5       | 18532      | 27           | 0.001457  | 0.007258  | 0.992742  | 96108     | 698       | 478798    | 4841016   | 50.37     |
| 30-34      | 30       | 5        | 0.5       | 16494      | 33           | 0.002001  | 0.009954  | 0.990046  | 95411     | 950       | 474680    | 4362218   | 45.72     |
| 35-39      | 35       | 5        | 0.5       | 15196      | 29           | 0.001895  | 0.009431  | 0.990569  | 94461     | 891       | 470078    | 3887539   | 41.15     |
| 40-44      | 40       | 5        | 0.5       | 13528      | 35           | 0.002602  | 0.012926  | 0.987074  | 93570     | 1209      | 464827    | 3417461   | 36.52     |
| 45-49      | 45       | 5        | 0.5       | 11675      | 42           | 0.003585  | 0.017763  | 0.982237  | 92361     | 1641      | 457702    | 2952633   | 31.97     |
| 50-54      | 50       | 5        | 0.5       | 10934      | 51           | 0.004678  | 0.02312   | 0.97688   | 90720     | 2097      | 448357    | 2494931   | 27.50     |
| 55-59      | 55       | 5        | 0.5       | 9081       | 88           | 0.009713  | 0.047413  | 0.952587  | 88623     | 4202      | 432608    | 2046575   | 23.09     |
| 60-64      | 60       | 5        | 0.5       | 7227       | 108          | 0.014915  | 0.071896  | 0.928104  | 84421     | 6069      | 406930    | 1613966   | 19.12     |
| 65-69      | 65       | 5        | 0.5       | 5560       | 135          | 0.024258  | 0.114356  | 0.885644  | 78351     | 8960      | 369356    | 1207037   | 15.41     |
| 70-74      | 70       | 5        | 0.5       | 3521       | 143          | 0.040493  | 0.183851  | 0.816149  | 69391     | 12758     | 315062    | 837680.2  | 12.07     |
| 75-79      | 75       | 5        | 0.5       | 2409       | 163          | 0.067681  | 0.289432  | 0.710568  | 56634     | 16392     | 242189    | 522618    | 9.23      |
| 80-85      | 80       | 5        | 0.5       | 1112       | 126          | 0.113546  | 0.442204  | 0.557796  | 40242     | 17795     | 156722    | 280428.9  | 6.97      |
| 85+        | 85       | 0        | 0.5       | 741        | 135          | 0.181452  | 1         | 0         | 22447     | 22447     | 123707    | 123706.7  | 5.51      |
| All ages   |          |          |           | 185320     | 1216         |           |           |           |           |           |           |           |           |



Appendix Figure 1 : *Logarithmic age-specific death rates at ages 55 to 70+ years for males and females in selected states of India with high overall completeness of death registration in 2019*

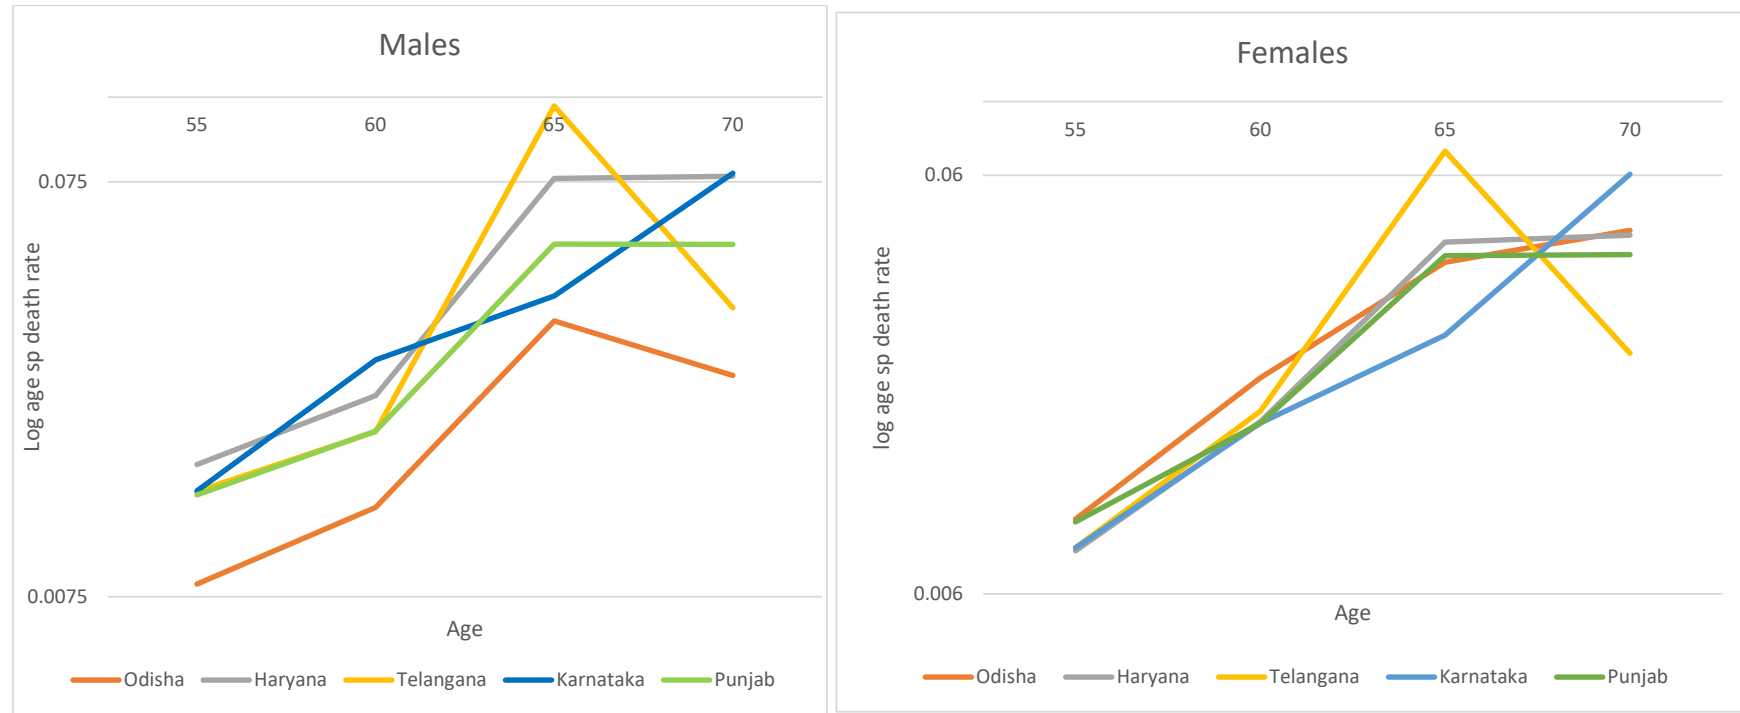

Appendix Figure 2a: Comparison of Study\* and GBD life expectancies at birth for males, 2019

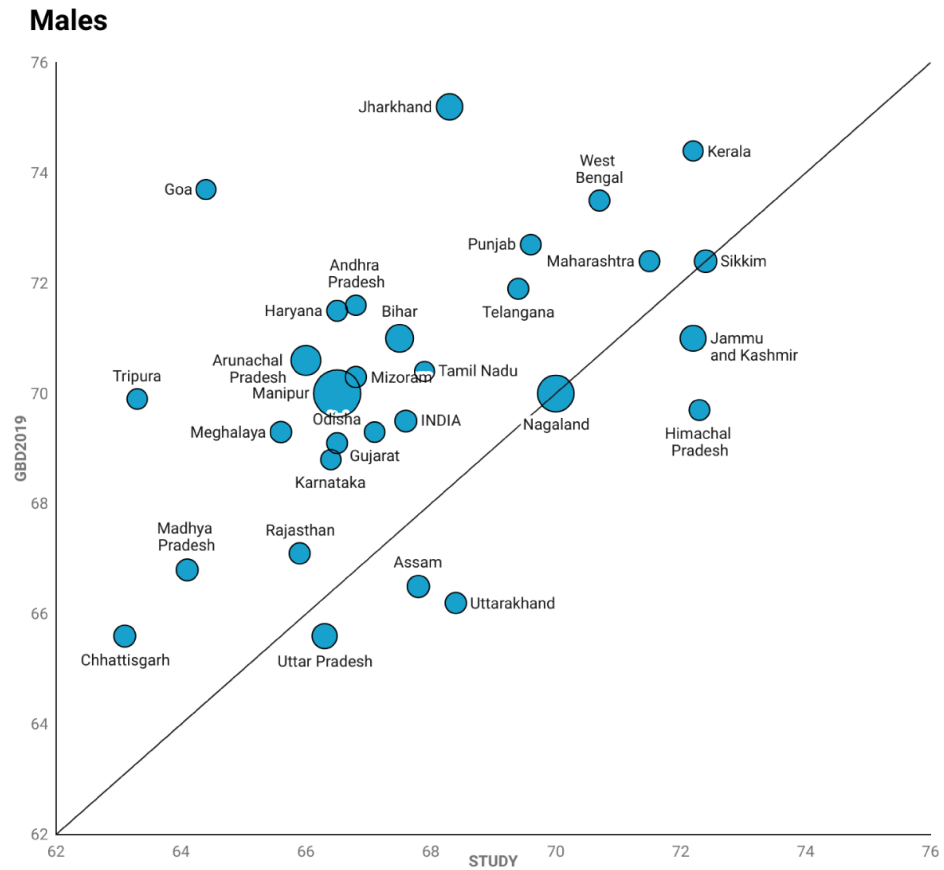

\*Study CRS life expectancies represented by bubbles scaled according to the magnitude of final adjustment factors applied to CRS data in their derivation

Appendix Figure 2b: Comparison of Study\* and GBD life expectancies at birth for females, 2019

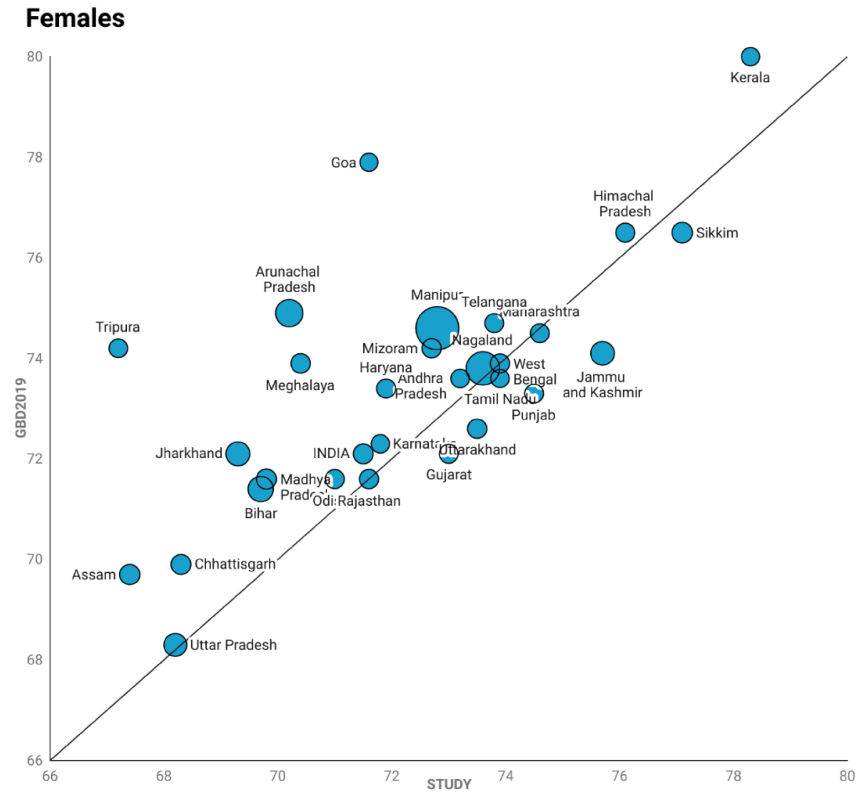

\*Study CRS life expectancies represented by bubbles scaled according to the magnitude of final adjustment factors applied to CRS data in their derivation
